# Supplementary material
Source: MDPI journal article supplement (https://www.mdpi.com/2571-712X/4/2/20)
Supplement: s1 [file s1]

Supporting information for

**Theoretical characterization of new dynamic bonds for responsive materials  
based on frustrated Lewis pairs**

Maialen Galdeano,<sup>1</sup> Fernando Ruipérez<sup>1,\*</sup> and Jon M. Matxain<sup>2,\*</sup>

<sup>1</sup>POLYMAT, University of the Basque Country UPV/EHU,  
Jose Mari Korta Center, Avda. Tolosa 72, 20018 Donostia – San Sebastián, Spain  
<sup>2</sup>Polimero eta Material Aurreratuak: Fisika, Kimika eta Teknologia Saila, Kimika Fakultatea,  
Euskal Herriko Unibertsitatea UPV/EHU and Donostia International Physics Center (DIPC),  
P.K. 1072, 20080 Donostia, Euskadi, Spain

email: jonmattin.matxain@ehu.eus; fernando.ruiperez@polymat.eu

Content: cartesian coordinates of all species, along with the calculated total energies and enthalpy values. All structures are minima of the Potential Energy Surface, and hence no imaginary frequencies are reported.

**Index**

|                                                |    |
|------------------------------------------------|----|
| 1. TPB derivatives. Cartesian coordinates..... | 1  |
| 2. TPP derivatives. Cartesian coordinates..... | 41 |
| 3. FLP cartesian coordinates.....              | 66 |
| 4. FLP-DEAD cartesian coordinates.....         | 98 |

**1. TPB derivatives. Cartesian coordinates**

**1. TPB. R = CF<sub>3</sub>**

E<sub>elec</sub> = -3755.179087 a.u.; H = -3754.822177 a.u.

|   |           |           |           |
|---|-----------|-----------|-----------|
| C | -3.276526 | -3.031922 | 0.011280  |
| C | -3.325704 | -1.948150 | -0.851908 |
| C | -2.301459 | -1.001775 | -0.860048 |
| C | -1.176335 | -1.091179 | 0.008839  |
| C | -1.174450 | -2.219117 | 0.878373  |
| C | -2.198056 | -3.166564 | 0.871722  |
| B | 0.000285  | -0.000315 | 0.009424  |
| C | 1.533352  | -0.473797 | 0.009368  |
| C | 2.019010  | -1.493114 | -0.858918 |
| C | 3.350945  | -1.906269 | -0.850677 |
| C | 4.264801  | -1.320482 | 0.011716  |
| C | 3.841787  | -0.318645 | 0.871384  |
| C | 2.509150  | 0.093062  | 0.878296  |
| C | -0.356397 | 1.563939  | 0.009123  |
| C | 0.283325  | 2.493978  | -0.859450 |
| C | -0.024734 | 3.854142  | -0.851123 |
| C | -0.988483 | 4.352858  | 0.011646  |
| C | -1.644325 | 3.485715  | 0.871676  |
| C | -1.334830 | 2.125769  | 0.878382  |
| C | 1.352434  | 2.134140  | -1.890434 |
| C | -2.141617 | 1.338155  | 1.910034  |
| H | 0.489376  | 4.526539  | -1.526909 |
| H | -2.389797 | 3.871382  | 1.556150  |

|   |           |           |           |
|---|-----------|-----------|-----------|
| C | -1.351406 | 5.818649  | -0.018295 |
| C | 1.172505  | -2.239149 | -1.889532 |
| C | 2.230653  | 1.185569  | 1.910006  |
| H | 3.676205  | -2.687916 | -1.526226 |
| H | 4.548580  | 0.134416  | 1.555596  |
| C | 5.715597  | -1.739359 | -0.018427 |
| C | -2.523341 | 0.104354  | -1.890810 |
| C | -0.089522 | -2.524196 | 1.910474  |
| H | -4.164799 | -1.838905 | -1.528025 |
| H | -2.159967 | -4.004754 | 1.556525  |
| C | -4.365424 | -4.078123 | -0.018899 |
| F | 0.162291  | -1.507338 | -2.407809 |
| F | 0.619417  | -3.369064 | -1.371368 |
| F | 1.928842  | -2.636347 | -2.946744 |
| F | 5.857050  | -3.041361 | -0.369780 |
| F | 6.315276  | -1.571914 | 1.185806  |
| F | 6.420107  | -1.003890 | -0.920995 |
| F | 2.411360  | 2.430695  | 1.391678  |
| F | 0.983704  | 1.151784  | 2.428131  |
| F | 3.078974  | 1.086964  | 2.967345  |
| F | 0.897964  | -3.304281 | 1.392812  |
| F | 0.505478  | -1.427377 | 2.427855  |
| F | -0.599705 | -3.208442 | 2.968189  |
| F | -5.564079 | -3.547993 | -0.366677 |
| F | -4.518137 | -4.683720 | 1.184288  |
| F | -4.083251 | -5.054160 | -0.924216 |
| F | -3.245546 | -0.351527 | -2.948181 |
| F | -3.224615 | 1.148745  | -1.372651 |
| F | -1.383997 | 0.612683  | -2.408840 |
| F | -3.309893 | 0.871374  | 1.391494  |
| F | -1.488308 | 0.275449  | 2.428249  |
| F | -2.481034 | 2.121900  | 2.967253  |
| F | 2.607614  | 2.222292  | -1.372992 |
| F | 1.225334  | 0.892745  | -2.407590 |
| F | 1.316483  | 2.986631  | -2.948543 |
| F | -0.295667 | 6.592289  | -0.372560 |
| F | -1.793462 | 6.254582  | 1.186866  |
| F | -2.342947 | 6.060378  | -0.918464 |

## 2. TPB. R = CH<sub>3</sub>

$E_{\text{elec}} = -1074.270401$  a.u.;  $H = -1073.725803$  a.u.

|   |           |           |           |
|---|-----------|-----------|-----------|
| C | -0.435826 | -4.403091 | -0.003143 |
| C | 0.408936  | -3.761404 | 0.908233  |
| C | 0.574027  | -2.375611 | 0.912065  |
| C | -0.156207 | -1.567101 | 0.000077  |
| C | -1.028415 | -2.213710 | -0.911941 |
| C | -1.137039 | -3.608006 | -0.910760 |
| B | 0.000045  | 0.000328  | 0.000760  |
| C | -1.279537 | 0.919100  | 0.000266  |
| C | -2.344452 | 0.691067  | 0.912749  |
| C | -3.462378 | 1.526528  | 0.908755  |
| C | -3.596397 | 2.578348  | -0.003155 |
| C | -2.557397 | 2.788228  | -0.910926 |
| C | -1.403923 | 1.997462  | -0.911958 |
| C | 1.435753  | 0.648728  | -0.000069 |

|   |           |           |           |
|---|-----------|-----------|-----------|
| C | 1.771400  | 1.684708  | 0.912435  |
| C | 3.054304  | 2.234159  | 0.908594  |
| C | 4.031995  | 1.823737  | -0.003351 |
| C | 3.693397  | 0.819691  | -0.911518 |
| C | 2.431431  | 0.216978  | -0.912615 |
| C | 0.778839  | 2.209235  | 1.930261  |
| C | 2.171753  | -0.875848 | -1.929871 |
| H | 3.297158  | 3.009916  | 1.634280  |
| H | 4.435304  | 0.490222  | -1.638037 |
| C | 5.405326  | 2.450228  | 0.000531  |
| C | -2.301657 | -0.430436 | 1.930998  |
| C | -0.327274 | 2.319806  | -1.928476 |
| H | -4.255658 | 1.348362  | 1.634251  |
| H | -2.643329 | 3.595687  | -1.637160 |
| C | -4.826373 | 3.453403  | 0.000348  |
| C | 1.525026  | -1.777945 | 1.929267  |
| C | -1.846105 | -1.442650 | -1.928492 |
| H | 0.960056  | -4.359434 | 1.633496  |
| H | -1.793789 | -4.085917 | -1.636748 |
| C | -0.579370 | -5.905731 | 0.000743  |
| H | -3.074908 | -0.285310 | 2.692070  |
| H | -2.466562 | -1.404595 | 1.457827  |
| H | -1.333811 | -0.489286 | 2.439860  |
| H | -4.768830 | 4.223473  | -0.774700 |
| H | -5.732303 | 2.860555  | -0.175441 |
| H | -4.950757 | 3.953613  | 0.968496  |
| H | -0.715478 | 2.999443  | -2.693759 |
| H | 0.537009  | 2.797780  | -1.454291 |
| H | 0.047949  | 1.422945  | -2.432122 |
| H | 1.291253  | 2.806238  | 2.691330  |
| H | 0.018279  | 2.839498  | 1.456534  |
| H | 0.243220  | 1.401011  | 2.439192  |
| H | 2.954426  | -0.879140 | -2.695165 |
| H | 2.153332  | -1.863721 | -1.456502 |
| H | 1.207528  | -0.751712 | -2.433546 |
| H | 6.043192  | 2.015048  | -0.774552 |
| H | 5.345826  | 3.531319  | -0.174908 |
| H | 5.900417  | 2.307068  | 0.968714  |
| H | -2.240467 | -2.118892 | -2.693639 |
| H | -2.692345 | -0.933220 | -1.454536 |
| H | -1.257175 | -0.669302 | -2.432357 |
| H | 1.786231  | -2.519945 | 2.690467  |
| H | 2.450863  | -1.434522 | 1.454948  |
| H | 1.093074  | -0.909777 | 2.438015  |
| H | -1.275776 | -6.240777 | -0.773715 |
| H | 0.386657  | -6.394358 | -0.175645 |
| H | -0.949817 | -6.263149 | 0.969248  |

### 3. TPB. R = CN

$E_{\text{elec}} = -1550.838094$  a.u.;  $H = -1550.549129$  a.u.

|   |          |          |           |
|---|----------|----------|-----------|
| C | 3.978715 | 1.902343 | -0.000263 |
| C | 3.714007 | 0.833153 | -0.865517 |
| C | 2.456801 | 0.222468 | -0.847370 |
| C | 1.415721 | 0.676978 | 0.000272  |
| C | 1.715947 | 1.772734 | 0.847683  |

|   |           |           |           |
|---|-----------|-----------|-----------|
| C | 2.980639  | 2.367782  | 0.865289  |
| B | -0.000065 | 0.000132  | 0.000338  |
| C | -1.294159 | 0.887707  | 0.000322  |
| C | -1.421125 | 2.016892  | -0.846894 |
| C | -2.578779 | 2.800059  | -0.864954 |
| C | -3.637237 | 2.494075  | -0.000090 |
| C | -3.541282 | 1.396622  | 0.864969  |
| C | -2.393408 | 0.599189  | 0.847288  |
| C | -0.121650 | -1.564391 | 0.000183  |
| C | -1.035558 | -2.238954 | -0.847556 |
| C | -1.135066 | -3.633083 | -0.865576 |
| C | -0.341420 | -4.396706 | -0.000134 |
| C | 0.560495  | -3.764845 | 0.865460  |
| C | 0.677264  | -2.372054 | 0.847728  |
| H | -1.826898 | -4.120139 | -1.543626 |
| H | 1.168909  | -4.352939 | 1.543387  |
| H | -2.654462 | 3.643037  | -1.542645 |
| H | -4.355070 | 1.163348  | 1.542420  |
| H | 4.481649  | 0.477310  | -1.543531 |
| H | 3.185909  | 3.188790  | 1.543090  |
| C | -0.362994 | 2.364949  | -1.747517 |
| N | 0.493738  | 2.659446  | -2.475462 |
| C | -4.816317 | 3.302375  | -0.000353 |
| N | -5.774527 | 3.959243  | -0.000570 |
| C | -2.336838 | -0.513296 | 1.747893  |
| N | -2.302905 | -1.418566 | 2.475872  |
| C | 0.724544  | 2.279698  | 1.748793  |
| C | 5.268413  | 2.518992  | -0.000544 |
| C | 2.228659  | -0.867581 | -1.748286 |
| N | 2.055189  | -1.756560 | -2.476462 |
| N | 6.316499  | 3.020146  | -0.000745 |
| N | -0.076265 | 2.702845  | 2.476990  |
| C | 1.611848  | -1.766775 | 1.748893  |
| C | -1.865399 | -1.496505 | -1.748682 |
| C | -0.451993 | -5.821961 | -0.000327 |
| N | 2.378472  | -1.284642 | 2.477220  |
| N | -0.541859 | -6.980221 | -0.000503 |
| N | -2.548154 | -0.901586 | -2.477062 |

#### 4. TPB. R = 5F

$E_{\text{elec}} = -2209.480848$  a.u.;  $H = -2209.300739$  a.u.

|   |           |           |           |
|---|-----------|-----------|-----------|
| C | -1.768735 | 1.763723  | -0.731042 |
| C | -1.441899 | 0.610328  | 0.000182  |
| C | -2.497387 | 0.041832  | 0.731211  |
| C | -3.780619 | 0.575266  | 0.753887  |
| C | -4.055867 | 1.716389  | 0.000038  |
| C | -3.045106 | 2.313320  | -0.753847 |
| B | -0.000247 | 0.000210  | 0.000019  |
| C | 0.192305  | -1.553390 | 0.000034  |
| C | 1.211915  | -2.183095 | 0.731891  |
| C | 1.391714  | -3.561070 | 0.754722  |
| C | 0.541762  | -4.370124 | 0.000222  |
| C | -0.480134 | -3.793411 | -0.754349 |
| C | -0.642545 | -2.413238 | -0.731705 |
| F | 2.053465  | -1.448063 | 1.488033  |

|   |           |           |           |
|---|-----------|-----------|-----------|
| F | 0.706192  | -5.695817 | 0.000355  |
| F | -1.638200 | -1.906184 | -1.487878 |
| F | -2.282031 | -1.055193 | 1.486407  |
| F | -5.286145 | 2.236870  | -0.000095 |
| F | -0.831461 | 2.372748  | -1.486587 |
| C | 1.249049  | 0.943592  | -0.000222 |
| C | 1.285347  | 2.141236  | 0.731951  |
| C | 2.389223  | 2.985426  | 0.754680  |
| C | 3.514437  | 2.653643  | -0.000362 |
| C | 3.525157  | 1.480472  | -0.755214 |
| C | 2.410793  | 0.650190  | -0.732318 |
| F | 4.580656  | 3.458435  | -0.000360 |
| F | 0.228507  | 2.502628  | 1.488723  |
| F | 2.468904  | -0.465658 | -1.488436 |
| F | -4.752220 | 0.009830  | 1.485417  |
| F | -3.315799 | 3.404277  | -1.485574 |
| F | -1.289001 | -4.573439 | -1.486581 |
| F | 2.366606  | -4.119688 | 1.487112  |
| F | 4.604773  | 1.169609  | -1.487791 |
| F | 2.386286  | 4.108803  | 1.487407  |

## 5. TPB. R = F

$E_{elec} = -1613.835736$  a.u.;  $H = -1613.613252$  a.u.

|   |           |           |           |
|---|-----------|-----------|-----------|
| C | 0.647979  | 4.338789  | -0.000282 |
| C | -0.394641 | 3.822837  | 0.758697  |
| C | -0.571523 | 2.448058  | 0.721817  |
| C | 0.231101  | 1.547311  | 0.000169  |
| C | 1.261890  | 2.174017  | -0.721627 |
| C | 1.494387  | 3.540470  | -0.758978 |
| B | -0.000077 | -0.000118 | 0.000356  |
| C | 1.224445  | -0.974017 | 0.000341  |
| C | 2.405622  | -0.729394 | 0.722356  |
| C | 3.507852  | -1.569866 | 0.759246  |
| C | 3.433702  | -2.730530 | -0.000165 |
| C | 2.319483  | -3.064129 | -0.759439 |
| C | 1.252249  | -2.179665 | -0.722103 |
| C | -1.455811 | -0.573597 | 0.000296  |
| C | -1.834793 | -1.718423 | 0.722709  |
| C | -3.113863 | -2.252564 | 0.759609  |
| C | -4.081759 | -1.608158 | -0.000151 |
| C | -3.813314 | -0.476651 | -0.759726 |
| C | -2.513657 | 0.005183  | -0.722376 |
| H | -3.344002 | -3.128410 | 1.353430  |
| H | -4.578853 | 0.006886  | -1.353726 |
| H | 4.381570  | -1.330943 | 1.352730  |
| H | 2.283539  | -3.968967 | -1.353297 |
| H | -1.038538 | 4.460108  | 1.351973  |
| H | 2.296428  | 3.961631  | -1.352316 |
| F | 4.491456  | -3.571468 | -0.000449 |
| F | 2.480966  | 0.394848  | 1.477233  |
| F | 0.174098  | -2.505974 | -1.477420 |
| F | 2.084159  | 1.403138  | -1.475957 |
| F | 0.847604  | 5.675266  | -0.000427 |
| F | -1.582896 | 1.951399  | 1.476712  |
| F | -2.256929 | 1.102028  | -1.477678 |

|   |           |           |           |
|---|-----------|-----------|-----------|
| F | -0.898995 | -2.345473 | 1.478040  |
| F | -5.339001 | -2.103513 | -0.000380 |

## 6. TPB. R = H

$E_{\text{elec}} = -720.230338$  a.u.;  $H = -719.941721$  a.u.

|   |           |           |           |
|---|-----------|-----------|-----------|
| B | 0.000003  | -0.000024 | 0.001862  |
| C | -1.469505 | -0.540172 | 0.000896  |
| C | -2.511168 | 0.159767  | -0.646447 |
| C | -1.810712 | -1.748418 | 0.647226  |
| C | -3.817368 | -0.325609 | -0.662160 |
| H | -2.282401 | 1.091408  | -1.158619 |
| C | -3.120375 | -2.224445 | 0.661180  |
| H | -1.033680 | -2.310368 | 1.160102  |
| C | -4.126176 | -1.516600 | -0.000930 |
| H | -4.596795 | 0.224544  | -1.183488 |
| H | -3.358634 | -3.148637 | 1.181813  |
| H | -5.146616 | -1.891657 | -0.001648 |
| C | 0.266938  | 1.542703  | 0.000783  |
| C | 1.394044  | 2.094901  | -0.646325 |
| C | -0.608992 | 2.442295  | 0.646947  |
| C | 1.626816  | 3.468791  | -0.661879 |
| H | 2.086529  | 1.431011  | -1.158493 |
| C | -0.366426 | 3.814511  | 0.661022  |
| H | -1.484297 | 2.050333  | 1.159598  |
| C | 0.749649  | 4.331676  | -0.000779 |
| H | 2.493054  | 3.868762  | -1.183043 |
| H | -1.047776 | 4.482917  | 1.181555  |
| H | 0.935069  | 5.402930  | -0.001366 |
| C | 1.202532  | -1.002597 | 0.000861  |
| C | 1.117145  | -2.254861 | -0.646129 |
| C | 2.419553  | -0.693823 | 0.647048  |
| C | 2.190683  | -3.143268 | -0.661912 |
| H | 0.195873  | -2.522741 | -1.158098 |
| C | 3.486732  | -1.589892 | 0.660923  |
| H | 2.517710  | 0.260143  | 1.159798  |
| C | 3.376628  | -2.814961 | -0.000994 |
| H | 2.103951  | -4.093440 | -1.183073 |
| H | 4.406297  | -1.333982 | 1.181373  |
| H | 4.211712  | -3.511094 | -0.001711 |

## 7. TPB. R = NH<sub>2</sub>

$E_{\text{elec}} = -1218.755348$  a.u.;  $H = -1218.307758$  a.u.

|   |           |           |           |
|---|-----------|-----------|-----------|
| C | 1.932823  | -3.994693 | 0.005971  |
| C | 2.432896  | -2.970647 | 0.818186  |
| C | 1.829692  | -1.706308 | 0.815152  |
| C | 0.687536  | -1.415084 | -0.003355 |
| C | 0.209423  | -2.494852 | -0.817950 |
| C | 0.824130  | -3.753140 | -0.813278 |
| B | -0.000053 | 0.000014  | -0.004554 |
| C | -1.569499 | 0.111831  | -0.003445 |
| C | -2.392766 | -0.730961 | 0.815810  |
| C | -3.789299 | -0.620957 | 0.818899  |
| C | -4.426054 | 0.323357  | 0.005771  |
| C | -3.662480 | 1.161995  | -0.814221 |
| C | -2.265371 | 1.065313  | -0.818567 |

|   |           |           |           |
|---|-----------|-----------|-----------|
| C | 0.881470  | 1.303105  | -0.003551 |
| C | 0.562445  | 2.438283  | 0.814477  |
| C | 1.356055  | 3.592668  | 0.817392  |
| C | 2.493434  | 3.671046  | 0.005856  |
| C | 2.838738  | 2.589794  | -0.812880 |
| C | 2.056050  | 1.428564  | -0.817680 |
| N | -0.497191 | 2.375046  | 1.707244  |
| N | 2.386799  | 0.424357  | -1.717876 |
| H | 1.104529  | 4.418463  | 1.480719  |
| H | 3.709295  | 2.656833  | -1.463162 |
| N | 3.315896  | 4.797499  | 0.060313  |
| N | -1.807632 | -1.615701 | 1.709562  |
| N | -1.560827 | 1.853141  | -1.719299 |
| H | -4.378542 | -1.250768 | 1.483226  |
| H | -4.155986 | 1.881391  | -1.465493 |
| N | -5.812890 | 0.472156  | 0.059905  |
| N | 2.303996  | -0.756764 | 1.708060  |
| N | -0.825148 | -2.279138 | -1.718681 |
| H | 3.273490  | -3.165707 | 1.481929  |
| H | 0.447507  | -4.540457 | -1.464058 |
| N | 2.497528  | -5.270049 | 0.060239  |
| H | 3.354017  | 0.402072  | -2.014394 |
| H | 1.999371  | -0.492438 | -1.511442 |
| H | -0.864714 | 3.263241  | 2.022437  |
| H | -1.210405 | 1.681922  | 1.498880  |
| H | 3.890004  | 4.954069  | -0.759528 |
| H | 2.864995  | 5.646687  | 0.379488  |
| H | 3.256919  | -0.882073 | 2.023556  |
| H | 2.059936  | 0.207317  | 1.499574  |
| H | -1.327315 | -3.105789 | -2.016019 |
| H | -1.426179 | -1.485899 | -1.511834 |
| H | 2.346685  | -5.845166 | -0.759975 |
| H | 3.458309  | -5.303879 | 0.379725  |
| H | -2.392870 | -2.377652 | 2.026182  |
| H | -0.851018 | -1.887274 | 1.500594  |
| H | -2.025295 | 2.701515  | -2.016745 |
| H | -0.573394 | 1.976855  | -1.512101 |
| H | -6.235495 | 0.889645  | -0.760682 |
| H | -6.322633 | -0.342676 | 0.380093  |

#### 8. TPB. R = NO<sub>2</sub>

$E_{\text{elec}} = -2561.838074$  a.u.;  $H = -2561.511658$  a.u.

|   |           |           |           |
|---|-----------|-----------|-----------|
| C | -3.257096 | -3.049239 | 0.000822  |
| C | -3.389019 | -1.915954 | -0.783038 |
| C | -2.346782 | -0.997486 | -0.782497 |
| C | -1.175689 | -1.101348 | -0.000136 |
| C | -1.149006 | -2.276565 | 0.782365  |
| C | -2.134493 | -3.255679 | 0.783985  |
| B | 0.000183  | -0.000157 | -0.000697 |
| C | 1.541868  | -0.467628 | -0.000786 |
| C | 2.037913  | -1.532825 | -0.784086 |
| C | 3.354534  | -1.975940 | -0.784768 |
| C | 4.269605  | -1.295693 | 0.000160  |
| C | 3.886615  | -0.221252 | 0.784435  |
| C | 2.545879  | 0.142425  | 0.782801  |

|   |           |           |           |
|---|-----------|-----------|-----------|
| C | -0.365766 | 1.568691  | -0.000248 |
| C | 0.310999  | 2.531487  | -0.780827 |
| C | 0.036246  | 3.893216  | -0.781442 |
| C | -1.012994 | 4.344882  | 0.000431  |
| C | -1.754174 | 3.475369  | 0.782014  |
| C | -1.398408 | 2.132520  | 0.780781  |
| N | 1.374998  | 2.119467  | -1.733512 |
| N | -2.170262 | 1.291978  | 1.733226  |
| H | 0.613620  | 4.575269  | -1.393402 |
| H | -2.573566 | 3.831471  | 1.394261  |
| N | -1.350625 | 5.793092  | 0.000796  |
| N | 1.149689  | -2.244757 | -1.739813 |
| N | 2.203075  | 1.228477  | 1.738053  |
| H | 3.656930  | -2.815128 | -1.399078 |
| H | 4.604104  | 0.308339  | 1.399084  |
| N | 5.692518  | -1.727821 | 0.000894  |
| N | -2.520011 | 0.128384  | -1.737470 |
| N | -0.036282 | -2.523681 | 1.736332  |
| H | -4.267400 | -1.757584 | -1.396563 |
| H | -2.034208 | -4.142420 | 1.397729  |
| N | -4.342952 | -4.065277 | 0.001463  |
| O | 1.464513  | -3.383285 | -2.078019 |
| O | 0.155363  | -1.633597 | -2.141746 |
| O | 6.465491  | -1.099709 | 0.723015  |
| O | 5.986276  | -2.680094 | -0.720463 |
| O | 3.097513  | 2.000559  | 2.075121  |
| O | 1.037047  | 1.272889  | 2.140710  |
| O | 0.186574  | -3.684866 | 2.070669  |
| O | 0.584210  | -1.536274 | 2.140905  |
| O | -3.663792 | 0.425583  | -2.073887 |
| O | -1.493983 | 0.683701  | -2.140786 |
| O | -4.185336 | -5.049159 | 0.723000  |
| O | -5.314800 | -3.842993 | -0.719351 |
| O | 2.207831  | 2.960622  | -2.063192 |
| O | 1.341055  | 0.955104  | -2.141880 |
| O | -3.289462 | 1.677630  | 2.062676  |
| O | -1.624570 | 0.262833  | 2.141475  |
| O | -2.283130 | 6.147944  | 0.720528  |
| O | -0.671152 | 6.524099  | -0.718541 |

### 9. TPB. R = OCH<sub>3</sub>

$E_{\text{elec}} = -1751.534491$  a.u.;  $H = -1750.936926$  a.u.

|   |           |           |           |
|---|-----------|-----------|-----------|
| C | 2.443797  | -3.671111 | 0.069522  |
| C | 2.816638  | -2.593515 | 0.876639  |
| C | 2.034668  | -1.437984 | 0.858141  |
| C | 0.871458  | -1.305247 | 0.064171  |
| C | 0.547885  | -2.426022 | -0.723579 |
| C | 1.309780  | -3.604403 | -0.741140 |
| B | -0.001253 | 0.000302  | 0.062763  |
| C | -1.568062 | -0.102360 | 0.063527  |
| C | -2.265280 | -1.046028 | 0.854048  |
| C | -3.657005 | -1.144825 | 0.872126  |
| C | -4.403406 | -0.279886 | 0.068112  |
| C | -3.778163 | 0.671466  | -0.739075 |
| C | -2.376695 | 0.741445  | -0.721262 |



|   |           |           |           |
|---|-----------|-----------|-----------|
| C | 0.694162  | 1.408253  | 0.062433  |
| C | 0.228645  | 2.483635  | 0.854944  |
| C | 0.840919  | 3.737360  | 0.873206  |
| C | 1.961866  | 3.950451  | 0.067121  |
| C | 2.469807  | 2.933510  | -0.742400 |
| C | 1.827707  | 1.685793  | -0.724671 |
| O | -0.852057 | 2.200825  | 1.649812  |
| O | 2.254380  | 0.657898  | -1.527922 |
| H | 0.493679  | 4.550445  | 1.498448  |
| H | 3.324757  | 3.106955  | -1.381150 |
| O | 2.503859  | 5.211165  | 0.138699  |
| O | -1.479018 | -1.840850 | 1.647508  |
| O | -1.701537 | 1.628175  | -1.522181 |
| H | -4.186351 | -1.854260 | 1.495905  |
| H | -4.356823 | 1.325782  | -1.376297 |
| O | -5.765912 | -0.443113 | 0.139323  |
| O | 2.326569  | -0.360731 | 1.654460  |
| O | -0.555561 | -2.283577 | -1.527331 |
| H | 3.693802  | -2.697930 | 1.502975  |
| H | 1.034679  | -4.431796 | -1.380495 |
| O | 3.266694  | -4.769280 | 0.141464  |
| C | -2.102502 | -2.873160 | 2.406073  |
| H | -1.284535 | -3.404010 | 2.896188  |
| H | -2.781461 | -2.460374 | 3.164794  |
| H | -2.657189 | -3.565448 | 1.758066  |
| C | -2.443307 | 2.618811  | -2.226020 |
| H | -1.694913 | 3.255305  | -2.701336 |
| H | -3.085865 | 2.170900  | -2.997226 |
| H | -3.057101 | 3.220431  | -1.541682 |
| C | -6.578332 | 0.432070  | -0.644277 |
| H | -7.608882 | 0.143198  | -0.431224 |
| H | -6.422514 | 1.481154  | -0.359374 |
| H | -6.375950 | 0.309772  | -1.716860 |
| C | -1.038873 | -3.419788 | -2.236112 |
| H | -1.962431 | -3.089363 | -2.714660 |
| H | -0.326177 | -3.749996 | -3.005074 |
| H | -1.255441 | -4.254006 | -1.554778 |
| C | 3.529092  | -0.385961 | 2.418082  |
| H | 3.577315  | 0.586447  | 2.911214  |
| H | 3.508298  | -1.182500 | 3.174477  |
| H | 4.408802  | -0.517899 | 1.773433  |
| C | 2.917803  | -5.909331 | -0.644965 |
| H | 3.682843  | -6.657453 | -0.430700 |
| H | 1.930621  | -6.299738 | -0.363716 |
| H | 2.925752  | -5.671341 | -1.717189 |
| C | 3.481397  | 0.804054  | -2.235059 |
| H | 3.655185  | -0.161611 | -2.713006 |
| H | 3.414055  | 1.586256  | -3.004407 |
| H | 4.311784  | 1.031703  | -1.552676 |
| C | -1.429435 | 3.256458  | 2.412758  |
| H | -2.297150 | 2.814278  | 2.905334  |
| H | -0.728890 | 3.635166  | 3.169626  |
| H | -1.752461 | 4.084954  | 1.767673  |
| C | 3.667106  | 5.476087  | -0.646550 |
| H | 3.934353  | 6.512302  | -0.432735 |

|   |          |          |           |
|---|----------|----------|-----------|
| H | 4.497101 | 4.814860 | -0.363831 |
| H | 3.458023 | 5.363585 | -1.718928 |

# 10. TPB. R = OCOCH<sub>3</sub>

E<sub>elec</sub> = -2772.273871 a.u.; H = -2771.580281 a.u

|   |           |           |           |
|---|-----------|-----------|-----------|
| C | -0.012421 | 2.640684  | 0.257624  |
| C | -0.632039 | 1.404695  | 0.551197  |
| C | -1.949237 | 1.526254  | 1.058704  |
| C | -2.622319 | 2.733060  | 1.178317  |
| C | -1.970869 | 3.903098  | 0.796401  |
| C | -0.647188 | 3.871501  | 0.367517  |
| B | 0.022557  | 0.018131  | 0.217091  |
| C | -0.909807 | -1.184308 | -0.183956 |
| C | -0.769255 | -2.446161 | 0.420072  |
| C | -1.681858 | -3.482105 | 0.255691  |
| C | -2.764207 | -3.282045 | -0.594359 |
| C | -2.929236 | -2.076325 | -1.274385 |
| C | -2.011336 | -1.059230 | -1.053825 |
| C | 1.579182  | -0.187219 | 0.260887  |
| C | 2.358809  | 0.249269  | 1.352387  |
| C | 3.739523  | 0.101236  | 1.408024  |
| C | 4.380554  | -0.559251 | 0.365395  |
| C | 3.665189  | -1.066597 | -0.715717 |
| C | 2.293799  | -0.839841 | -0.764810 |
| H | -3.642140 | 2.762560  | 1.545568  |
| H | -0.121102 | 4.785251  | 0.114433  |
| H | -1.577433 | -4.413381 | 0.800539  |
| H | -3.783111 | -1.931615 | -1.926224 |
| H | 4.313854  | 0.491016  | 2.240259  |
| H | 4.180886  | -1.621777 | -1.489436 |
| O | -2.222956 | 0.194890  | -1.626652 |
| C | -2.302562 | 0.426716  | -2.994308 |
| O | -2.580970 | 1.550143  | -3.336216 |
| C | -1.989580 | -0.715956 | -3.925930 |
| H | -1.187130 | -1.353862 | -3.548043 |
| H | -2.879590 | -1.338540 | -4.063202 |
| H | -1.714987 | -0.292160 | -4.892112 |
| O | -3.662477 | -4.317449 | -0.795635 |
| O | 0.267927  | -2.607804 | 1.346155  |
| C | -4.881438 | -4.367889 | -0.092139 |
| C | 1.349144  | -3.445735 | 1.094215  |
| O | 2.217244  | -3.484084 | 1.929815  |
| C | 1.349415  | -4.229633 | -0.193727 |
| O | -5.609434 | -5.292231 | -0.327258 |
| C | -5.138432 | -3.248390 | 0.882230  |
| H | -6.046376 | -3.481892 | 1.437186  |
| H | -4.298484 | -3.097111 | 1.565938  |
| H | -5.271981 | -2.304142 | 0.343689  |
| H | 0.689160  | -5.097783 | -0.097113 |
| H | 0.994157  | -3.630877 | -1.035333 |
| H | 2.366681  | -4.579359 | -0.369555 |
| O | 1.534305  | -1.327658 | -1.828508 |
| O | 1.698636  | 0.919892  | 2.371040  |
| O | 5.748261  | -0.770988 | 0.435745  |
| C | 1.876483  | -1.249062 | -3.175614 |

|   |           |           |           |
|---|-----------|-----------|-----------|
| C | 1.725653  | 0.508848  | 3.709744  |
| C | 6.647234  | 0.126476  | -0.167671 |
| O | 1.191188  | -1.886716 | -3.935978 |
| C | 3.010560  | -0.349491 | -3.600301 |
| H | 3.187259  | 0.478246  | -2.911366 |
| H | 3.928167  | -0.940743 | -3.687287 |
| H | 2.765171  | 0.025424  | -4.595486 |
| O | 1.201890  | 1.246578  | 4.504305  |
| C | 2.345311  | -0.824931 | 4.028773  |
| H | 2.112061  | -1.584848 | 3.278142  |
| H | 3.435051  | -0.734234 | 4.079426  |
| H | 1.979563  | -1.128207 | 5.010097  |
| O | 7.817194  | -0.124209 | -0.079469 |
| C | 6.036537  | 1.313253  | -0.868003 |
| H | 5.357910  | 1.864025  | -0.210624 |
| H | 6.842517  | 1.960556  | -1.211346 |
| H | 5.436174  | 0.985908  | -1.722460 |
| O | -2.655698 | 0.375035  | 1.399579  |
| O | 1.329342  | 2.691105  | -0.133451 |
| O | -2.634863 | 5.112989  | 0.901372  |
| C | -2.649475 | -0.135281 | 2.698305  |
| C | 1.722820  | 2.452930  | -1.432085 |
| C | -3.334916 | 5.641994  | -0.199180 |
| O | -3.912418 | 6.680300  | -0.036963 |
| C | -3.271510 | 4.844449  | -1.478213 |
| O | -3.171650 | -1.207072 | 2.868420  |
| C | -2.019536 | 0.725884  | 3.757749  |
| O | 2.906853  | 2.473495  | -1.672868 |
| C | 0.637376  | 2.160066  | -2.435919 |
| H | 0.281274  | 1.135240  | -2.282829 |
| H | -0.231172 | 2.811272  | -2.318073 |
| H | 1.052391  | 2.248854  | -3.439186 |
| H | -1.032807 | 1.088163  | 3.460184  |
| H | -2.647001 | 1.608090  | 3.927703  |
| H | -1.945821 | 0.150316  | 4.679299  |
| H | -3.566065 | 3.802345  | -1.323956 |
| H | -3.925463 | 5.317446  | -2.209589 |
| H | -2.245578 | 4.829649  | -1.860714 |

# 11. TPB. R = OH

$E_{\text{elec}} = -1397.602005 \text{ a.u.}; H = -1397.268809 \text{ a.u.}$

|   |           |           |           |
|---|-----------|-----------|-----------|
| C | -3.057009 | -3.185023 | 0.009654  |
| C | -1.928932 | -3.308346 | 0.815958  |
| C | -0.967254 | -2.296221 | 0.787815  |
| C | -1.083248 | -1.132243 | -0.002531 |
| C | -2.250896 | -1.062216 | -0.787846 |
| C | -3.226268 | -2.064722 | -0.804169 |
| B | 0.000261  | -0.000593 | -0.003125 |
| C | -0.438441 | 1.503536  | -0.002006 |
| C | -1.501901 | 1.985091  | 0.791584  |
| C | -1.898521 | 3.323737  | 0.819590  |
| C | -1.231296 | 4.238560  | 0.009763  |
| C | -0.178965 | 3.824844  | -0.807242 |
| C | 0.202713  | 2.479211  | -0.790495 |
| C | 1.522210  | -0.372368 | -0.002002 |

|   |           |           |           |
|---|-----------|-----------|-----------|
| C | 2.471184  | 0.310071  | 0.789593  |
| C | 3.828914  | -0.015221 | 0.817813  |
| C | 4.287576  | -1.052254 | 0.010321  |
| C | 3.403052  | -1.758938 | -0.804724 |
| C | 2.046769  | -1.417064 | -0.788419 |
| O | 2.002488  | 1.315291  | 1.600413  |
| O | 1.170098  | -2.089921 | -1.605898 |
| H | 4.528048  | 0.515277  | 1.459208  |
| H | 3.764649  | -2.557477 | -1.452415 |
| O | 5.632120  | -1.337069 | 0.055234  |
| O | -2.136439 | 1.077317  | 1.604613  |
| O | 1.222030  | 2.055164  | -1.609564 |
| H | -2.705902 | 3.664794  | 1.462570  |
| H | 0.330639  | 4.536521  | -1.456658 |
| O | -1.656417 | 5.545580  | 0.054486  |
| O | 0.138290  | -2.394928 | 1.597512  |
| O | -2.394764 | 0.034219  | -1.604381 |
| H | -1.819421 | -4.179830 | 1.456370  |
| H | -4.099097 | -1.977044 | -1.451010 |
| O | -3.977003 | -4.206073 | 0.054461  |
| H | -2.838320 | 1.539881  | 2.089499  |
| H | -1.099484 | 6.072712  | -0.540530 |
| H | 1.591219  | 2.826500  | -2.067826 |
| H | -3.248928 | -0.029952 | -2.059962 |
| H | 0.089206  | -3.235262 | 2.080368  |
| H | -4.713460 | -3.985368 | -0.538001 |
| H | 1.653802  | -2.796006 | -2.062779 |
| H | 2.754189  | 1.693256  | 2.083954  |
| H | 5.810207  | -2.084279 | -0.538106 |

## 12. TPB. R = SO<sub>3</sub>H

$E_{\text{elec}} = -6336.398847$  a.u.;  $H = -6335.946055$  a.u

|   |           |           |           |
|---|-----------|-----------|-----------|
| C | 2.747928  | -0.523970 | 1.082149  |
| C | 1.567995  | -0.847777 | 0.354639  |
| C | 1.839618  | -1.639659 | -0.804664 |
| C | 3.126288  | -1.812656 | -1.319152 |
| C | 4.220581  | -1.319321 | -0.626653 |
| C | 4.045873  | -0.748938 | 0.621511  |
| B | 0.115671  | -0.143607 | 0.673728  |
| C | -1.249076 | -0.889025 | 0.089228  |
| C | -2.032894 | -0.457804 | -1.003655 |
| C | -3.307414 | -0.948801 | -1.302784 |
| C | -3.824604 | -1.978813 | -0.537858 |
| C | -3.081638 | -2.511683 | 0.507105  |
| C | -1.836181 | -1.964012 | 0.812075  |
| S | -1.493432 | 0.745393  | -2.232173 |
| S | -5.442240 | -2.637178 | -0.907820 |
| S | -1.218250 | -2.814340 | 2.304880  |
| S | 0.614703  | -2.681111 | -1.670033 |
| S | 5.853582  | -1.487743 | -1.320818 |
| S | 2.753586  | 0.107966  | 2.774178  |
| C | -0.001984 | 1.509340  | 0.492894  |
| C | 0.603867  | 2.527363  | -0.271284 |
| C | -0.004138 | 3.768562  | -0.447734 |
| C | -1.231879 | 4.035955  | 0.163096  |

|   |           |           |           |
|---|-----------|-----------|-----------|
| C | -1.737146 | 3.186283  | 1.136886  |
| C | -1.070605 | 1.974913  | 1.284419  |
| S | -2.180069 | 5.450922  | -0.372560 |
| S | 2.315816  | 2.375311  | -0.810416 |
| S | -1.212293 | 0.925730  | 2.683233  |
| H | 3.288282  | -2.344613 | -2.247253 |
| H | 4.897694  | -0.467910 | 1.229522  |
| H | -3.879992 | -0.544328 | -2.130129 |
| H | -3.479663 | -3.336649 | 1.087685  |
| H | 0.448895  | 4.524455  | -1.078205 |
| H | -2.613316 | 3.453098  | 1.718518  |
| O | 0.349950  | -2.717939 | 2.393377  |
| O | -1.525413 | -4.208551 | 2.168034  |
| O | -1.839369 | -2.089570 | 3.435698  |
| H | 0.694939  | -1.922411 | 2.893575  |
| O | -6.180900 | -1.625427 | -1.610557 |
| O | -5.096464 | -3.766071 | -2.020505 |
| O | -5.935395 | -3.308542 | 0.271891  |
| H | -4.979206 | -4.620191 | -1.561237 |
| O | -1.941379 | 0.021724  | -3.589678 |
| O | -0.054220 | 0.856712  | -2.243954 |
| O | -2.329727 | 1.921443  | -2.134190 |
| H | -1.332659 | -0.746473 | -3.702498 |
| O | 4.119327  | 0.345690  | 3.164469  |
| O | 6.814081  | -1.363988 | -0.250438 |
| O | 1.554289  | -3.686404 | -2.517667 |
| O | 1.985815  | 1.506588  | 2.671877  |
| O | 5.837266  | -2.589535 | -2.244051 |
| O | -0.066794 | -3.480886 | -0.680182 |
| O | 1.926801  | -0.757810 | 3.593874  |
| H | 2.488602  | 2.087174  | 2.040403  |
| O | 5.955650  | -0.164170 | -2.251391 |
| H | 6.300782  | 0.567767  | -1.704177 |
| O | -0.110662 | -1.977515 | -2.701390 |
| H | 1.807216  | -4.431588 | -1.937351 |
| O | -0.894086 | 1.593954  | 3.905869  |
| O | -0.221590 | -0.154036 | 2.240969  |
| O | -1.345756 | 6.619608  | -0.423080 |
| O | -2.402251 | 5.051057  | -1.919047 |
| O | 3.085411  | 2.681818  | 0.384928  |
| O | 2.615016  | 1.198966  | -1.580010 |
| O | -2.599484 | 0.233266  | 2.735435  |
| H | -2.424716 | -0.751940 | 3.075096  |
| O | 2.510144  | 3.661858  | -1.758686 |
| H | 2.358119  | 3.375638  | -2.681857 |
| O | -3.433458 | 5.417968  | 0.340523  |
| H | -2.877789 | 4.195385  | -1.984512 |

### 13. H<sup>-</sup>

$E_{\text{elec}} = -0.505923$  a.u.;  $H = -0.503562$  a.u

|    |          |          |          |
|----|----------|----------|----------|
| H. | 0.000000 | 0.000000 | 0.000000 |
|----|----------|----------|----------|

### 14. TPB hydride. R = CF<sub>3</sub>

$E_{\text{elec}} = -3755.895195$  a.u.;  $H = -3755.529546$  a.u

|   |           |           |          |
|---|-----------|-----------|----------|
| C | -0.847513 | -2.467308 | 0.923671 |
|---|-----------|-----------|----------|

|   |           |           |           |
|---|-----------|-----------|-----------|
| C | -0.974991 | -1.318706 | 0.079159  |
| C | -2.031638 | -1.431881 | -0.870661 |
| C | -2.841787 | -2.565733 | -0.985496 |
| C | -2.642013 | -3.662853 | -0.165045 |
| C | -1.642597 | -3.605112 | 0.796225  |
| B | 0.000322  | -0.000539 | 0.393855  |
| C | -0.653977 | 1.503245  | 0.080486  |
| C | -0.225586 | 2.474822  | -0.870291 |
| C | -0.804031 | 3.742582  | -0.985709 |
| C | -1.853652 | 4.117592  | -0.164540 |
| C | -2.301062 | 3.223565  | 0.798144  |
| C | -1.711809 | 1.966819  | 0.925950  |
| C | 0.960202  | 2.295711  | -1.807705 |
| F | 0.908481  | 3.165595  | -2.868915 |
| C | -2.518165 | 5.451257  | -0.328634 |
| F | -3.604157 | 5.393701  | -1.161239 |
| C | -2.243328 | 1.173432  | 2.118820  |
| F | -3.384326 | 1.741670  | 2.635686  |
| C | -2.468690 | -0.314819 | -1.807767 |
| F | -3.197361 | -0.793955 | -2.868456 |
| C | -3.466911 | -4.903785 | -0.328859 |
| F | -2.878353 | -5.814502 | -1.165594 |
| C | 0.106873  | -2.532459 | 2.115300  |
| F | 0.184629  | -3.805009 | 2.631530  |
| C | 1.629978  | -0.185710 | 0.080564  |
| C | 2.257515  | -1.042499 | -0.870124 |
| C | 3.644657  | -1.175167 | -0.985191 |
| C | 4.494070  | -0.453715 | -0.163732 |
| C | 3.943289  | 0.380765  | 0.798723  |
| C | 2.560217  | 0.498788  | 0.926059  |
| C | 5.981245  | -0.545435 | -0.328209 |
| F | 6.473329  | 0.418176  | -1.167997 |
| C | 1.510238  | -1.980310 | -1.807753 |
| F | 0.390092  | -1.480204 | -2.358947 |
| C | 2.138619  | 1.356528  | 2.118318  |
| F | 3.201254  | 2.060324  | 2.635411  |
| F | -3.301292 | 0.570685  | -1.176986 |
| F | -1.474271 | 0.401408  | -2.361719 |
| F | 1.388287  | -2.196244 | 1.841855  |
| F | -0.310404 | -1.756539 | 3.149271  |
| F | -4.697761 | -4.649129 | -0.855035 |
| F | -3.668625 | -5.555671 | 0.851591  |
| F | 1.084592  | 1.076150  | -2.360821 |
| F | 2.143027  | 2.575775  | -1.177090 |
| F | -2.591784 | -0.105026 | 1.846718  |
| F | -1.361700 | 1.148724  | 3.151897  |
| F | -1.685472 | 6.389986  | -0.859680 |
| F | -2.978264 | 5.953572  | 0.852552  |
| F | 2.289085  | -2.367427 | -2.870353 |
| F | 1.164781  | -3.146332 | -1.178262 |
| F | 1.206351  | 2.297933  | 1.845199  |
| F | 1.675525  | 0.606226  | 3.151604  |
| F | 6.377832  | -1.739465 | -0.851550 |
| F | 6.647228  | -0.389892 | 0.851287  |
| H | -3.635877 | -2.589812 | -1.720514 |

|   |           |           |           |
|---|-----------|-----------|-----------|
| H | -1.497777 | -4.445564 | 1.462027  |
| H | -0.429230 | 4.442144  | -1.721592 |
| H | -3.100873 | 3.518010  | 1.464659  |
| H | 4.063355  | -1.849483 | -1.720995 |
| H | 4.597935  | 0.926271  | 1.465403  |
| H | -0.000566 | -0.001319 | 1.593894  |

### 15. TPB hydride. R = CH<sub>3</sub>

E<sub>elec</sub> = -1074.922920 a.u.; H = -1074.368678 a.u

|   |           |           |           |
|---|-----------|-----------|-----------|
| C | -2.371999 | -0.271100 | 0.803206  |
| C | -1.572122 | 0.353792  | -0.188937 |
| C | -2.220659 | 1.352012  | -0.970430 |
| C | -3.566223 | 1.682569  | -0.770038 |
| C | -4.345380 | 1.048439  | 0.199266  |
| C | -3.719979 | 0.075822  | 0.978218  |
| B | -0.000628 | 0.000599  | -0.542290 |
| C | 1.091628  | 1.184431  | -0.189648 |
| C | 2.280511  | 1.245379  | -0.971123 |
| C | 3.241005  | 2.243978  | -0.770524 |
| C | 3.082758  | 3.235966  | 0.198869  |
| C | 1.927331  | 3.182576  | 0.977308  |
| C | 0.951408  | 2.190115  | 0.802052  |
| C | 2.560708  | 0.215661  | -2.044078 |
| C | 4.108898  | 4.331132  | 0.381410  |
| C | -0.232033 | 2.230843  | 1.747314  |
| C | -1.469861 | 2.110825  | -2.043024 |
| C | -5.807534 | 1.387013  | 0.381266  |
| C | -1.813837 | -1.314778 | 1.749144  |
| C | 0.479362  | -1.536957 | -0.189155 |
| C | -0.060477 | -2.597638 | -0.971105 |
| C | 0.325920  | -3.928220 | -0.770649 |
| C | 1.264101  | -4.286024 | 0.199206  |
| C | 1.793402  | -3.258184 | 0.978462  |
| C | 1.420086  | -1.917284 | 0.803311  |
| C | 1.701533  | -5.721653 | 0.381658  |
| C | -1.092582 | -2.326714 | -2.044139 |
| C | 2.044495  | -0.912265 | 1.749719  |
| H | -4.016089 | 2.462547  | -1.387675 |
| H | -4.293413 | -0.423667 | 1.761791  |
| H | 4.141553  | 2.242274  | -1.387968 |
| H | 1.782327  | 3.929273  | 1.760709  |
| H | -0.124405 | -4.707759 | -1.388510 |
| H | 2.512160  | -3.505187 | 1.762481  |
| H | 3.553000  | 0.374160  | -2.484537 |
| H | 2.510742  | -0.802907 | -1.643581 |
| H | 1.806763  | 0.265645  | -2.839301 |
| H | 4.083508  | 4.733908  | 1.401048  |
| H | 5.124112  | 3.964437  | 0.185826  |
| H | 3.929157  | 5.170736  | -0.305911 |
| H | -0.027957 | 2.910753  | 2.584067  |
| H | -1.146410 | 2.567378  | 1.246208  |
| H | -0.456782 | 1.240822  | 2.155242  |
| H | -2.104343 | 2.889902  | -2.483723 |
| H | -0.563805 | 2.578337  | -1.641896 |

|   |           |           |           |
|---|-----------|-----------|-----------|
| H | -1.134494 | 1.433570  | -2.838113 |
| H | -2.504877 | -1.479352 | 2.585496  |
| H | -1.645486 | -2.274649 | 1.248427  |
| H | -0.845130 | -1.011845 | 2.157652  |
| H | -6.143485 | 1.163708  | 1.400978  |
| H | -5.999458 | 2.449079  | 0.184905  |
| H | -6.443575 | 0.809930  | -0.305816 |
| H | 2.528744  | -1.428564 | 2.588199  |
| H | 2.794827  | -0.289060 | 1.250582  |
| H | 1.298349  | -0.222370 | 2.155019  |
| H | -1.450238 | -3.265748 | -2.484644 |
| H | -1.950432 | -1.775343 | -1.643517 |
| H | -0.673214 | -1.698074 | -2.839308 |
| H | 2.064686  | -5.900164 | 1.400864  |
| H | 0.876993  | -6.418668 | 0.187493  |
| H | 2.517869  | -5.985000 | -0.306735 |
| H | -0.000821 | 0.000492  | -1.769659 |

#### 16. TPB hydride. R = CN

$E_{\text{elec}} = -1551.591233$  a.u.;  $H = -1551.293166$  a.u

|   |           |           |           |
|---|-----------|-----------|-----------|
| C | -2.438871 | 0.879847  | -0.944222 |
| C | -1.581361 | 0.003222  | -0.227563 |
| C | -2.231265 | -0.822048 | 0.721744  |
| C | -3.616416 | -0.790077 | 0.934062  |
| C | -4.418488 | 0.088089  | 0.199313  |
| C | -3.820484 | 0.933854  | -0.743403 |
| B | -0.000134 | 0.000119  | -0.610547 |
| C | 0.787800  | -1.370860 | -0.227604 |
| C | 1.827122  | -1.521200 | 0.722060  |
| C | 2.491989  | -2.736763 | 0.934398  |
| C | 2.132734  | -3.870356 | 0.199372  |
| C | 1.101531  | -3.775240 | -0.743608 |
| C | 0.457573  | -2.551698 | -0.944492 |
| C | 2.243372  | -0.436126 | 1.562100  |
| N | 2.628790  | 0.392012  | 2.281856  |
| C | 2.807127  | -5.112264 | 0.409665  |
| N | 3.356843  | -6.123387 | 0.577754  |
| C | -0.603050 | -2.529760 | -1.910054 |
| N | -1.474149 | -2.572876 | -2.678994 |
| C | -1.499837 | -1.725610 | 1.561342  |
| N | -0.975614 | -2.473974 | 2.280750  |
| C | -5.831210 | 0.124914  | 0.409594  |
| N | -6.981730 | 0.154320  | 0.577678  |
| C | -1.889473 | 1.787771  | -1.909383 |
| N | -1.491162 | 2.564008  | -2.677983 |
| C | 0.793383  | 1.367896  | -0.227787 |
| C | 0.403580  | 2.343778  | 0.721072  |
| C | 1.124131  | 3.527210  | 0.933326  |
| C | 2.286090  | 3.782119  | 0.199021  |
| C | 2.719632  | 2.840912  | -0.743221 |
| C | 1.981721  | 1.671610  | -0.944037 |
| C | 3.024696  | 4.986950  | 0.409268  |
| N | 3.625725  | 5.968445  | 0.577319  |
| C | -0.744914 | 2.162684  | 1.560411  |



|   |           |           |           |
|---|-----------|-----------|-----------|
| N | -1.655353 | 2.083246  | 2.279576  |
| C | 2.493318  | 0.741408  | -1.908763 |
| N | 2.966329  | 0.007924  | -2.677011 |
| H | -4.063705 | -1.440739 | 1.677774  |
| H | -4.427366 | 1.625926  | -1.317276 |
| H | 3.278867  | -2.798903 | 1.678372  |
| H | 0.805783  | -4.646785 | -1.317666 |
| H | 0.784222  | 4.240221  | 1.676706  |
| H | 3.622730  | 3.019975  | -1.316765 |
| H | -0.000195 | 0.000110  | -1.830696 |

#### 17. TPB hydride. R = 5F

$E_{\text{elec}} = -2210.192388$  a.u.;  $H = -2210.004197$  a.u

|   |           |           |           |
|---|-----------|-----------|-----------|
| C | 0.352125  | -2.248671 | 0.676372  |
| C | -0.282505 | -1.550640 | -0.351164 |
| C | -1.226290 | -2.301258 | -1.057281 |
| C | -1.519223 | -3.636344 | -0.790435 |
| C | -0.846224 | -4.287918 | 0.238477  |
| C | 0.098319  | -3.586062 | 0.978956  |
| B | 0.003731  | 0.002334  | -0.799453 |
| C | 1.491059  | 0.532832  | -0.352315 |
| C | 2.612143  | 0.112667  | -1.072922 |
| C | 3.913208  | 0.531483  | -0.805523 |
| C | 4.140103  | 1.422312  | 0.238947  |
| C | 3.060799  | 1.867117  | 0.994236  |
| C | 1.777499  | 1.414182  | 0.690290  |
| F | 2.467287  | -0.767362 | -2.096749 |
| F | 4.960046  | 0.088397  | -1.543139 |
| F | 5.394105  | 1.846453  | 0.517930  |
| F | 3.275002  | 2.725261  | 2.020512  |
| F | 0.786412  | 1.872433  | 1.499823  |
| F | -1.929514 | -1.725906 | -2.066413 |
| F | -2.445182 | -4.311239 | -1.513876 |
| F | -1.110441 | -5.585246 | 0.516693  |
| F | 0.749146  | -4.210170 | 1.990117  |
| F | 1.264930  | -1.630302 | 1.471412  |
| C | -1.199725 | 1.023220  | -0.348829 |
| C | -2.090400 | 0.834034  | 0.708041  |
| C | -3.127238 | 1.713429  | 1.017055  |
| C | -3.300873 | 2.861656  | 0.252239  |
| C | -2.431867 | 3.107246  | -0.806188 |
| C | -1.414658 | 2.195369  | -1.078212 |
| F | -1.970684 | -0.244264 | 1.526726  |
| F | -0.597102 | 2.506268  | -2.116722 |
| F | -2.590523 | 4.226740  | -1.553122 |
| F | -4.298347 | 3.730484  | 0.535837  |
| F | -3.961638 | 1.473896  | 2.057208  |
| H | 0.002346  | 0.001397  | -2.009348 |

#### 18. TPB hydride. R = F

$E_{\text{elec}} = -1614.520717$  a.u.;  $H = -1614.291417$  a.u

|   |          |          |           |
|---|----------|----------|-----------|
| C | 1.177791 | 1.985802 | 0.722719  |
| C | 1.201030 | 1.033951 | -0.298948 |
| C | 2.415362 | 1.042144 | -0.993445 |
| C | 3.499078 | 1.885863 | -0.754059 |

|   |           |           |           |
|---|-----------|-----------|-----------|
| C | 3.356060  | 2.801288  | 0.276339  |
| C | 2.203355  | 2.877869  | 1.039426  |
| B | -0.001268 | 0.010322  | -0.742335 |
| C | 0.287000  | -1.540914 | -0.292417 |
| C | -0.268662 | -2.606201 | -1.008118 |
| C | -0.067200 | -3.963333 | -0.758359 |
| C | 0.760726  | -4.281743 | 0.305975  |
| C | 1.356788  | -3.310698 | 1.092972  |
| C | 1.087896  | -1.981731 | 0.763570  |
| F | -1.101556 | -2.324392 | -2.053654 |
| F | 0.992844  | -5.602784 | 0.592911  |
| F | 1.669734  | -1.056791 | 1.584387  |
| F | 2.591495  | 0.140335  | -2.004492 |
| F | 4.392761  | 3.655896  | 0.552401  |
| F | 0.071658  | 2.076710  | 1.520724  |
| C | -1.491276 | 0.528744  | -0.293914 |
| C | -2.169127 | 1.498257  | -1.039845 |
| C | -3.452424 | 1.983877  | -0.790007 |
| C | -4.113048 | 1.455672  | 0.307277  |
| C | -3.535763 | 0.499581  | 1.126028  |
| C | -2.246460 | 0.083009  | 0.793246  |
| F | -5.378579 | 1.899051  | 0.595573  |
| F | -1.538355 | 2.051710  | -2.117713 |
| F | -1.700647 | -0.835872 | 1.644889  |
| H | 4.405406  | 1.823022  | -1.344703 |
| H | 2.099952  | 3.587273  | 1.852035  |
| H | -0.538127 | -4.725938 | -1.367391 |
| H | 1.993363  | -3.564300 | 1.932439  |
| H | -3.904280 | 2.738051  | -1.423490 |
| H | -4.050910 | 0.098876  | 1.991073  |
| H | -0.000027 | 0.007997  | -1.954158 |

### 19. TPB hydride. R = H

$E_{\text{elec}} = -720.883663$  a.u.;  $H = -720.589478$  a.u

|   |           |           |           |
|---|-----------|-----------|-----------|
| C | -4.241537 | 0.572500  | -0.466048 |
| C | -3.935492 | -0.258040 | 0.617023  |
| C | -2.611609 | -0.406983 | 1.033372  |
| C | -1.537035 | 0.252590  | 0.401607  |
| C | -1.881852 | 1.080761  | -0.683644 |
| C | -3.202954 | 1.242575  | -1.114918 |
| B | -0.000308 | 0.000310  | 0.903250  |
| C | 0.987031  | 1.204661  | 0.401902  |
| C | 0.954000  | 2.465080  | 1.033653  |
| C | 1.745861  | 3.536504  | 0.617399  |
| C | 2.618199  | 3.385622  | -0.465560 |
| C | 2.678363  | 2.151098  | -1.114363 |
| C | 1.876751  | 1.088559  | -0.683230 |
| C | 0.549291  | -1.456796 | 0.401828  |
| C | 1.652500  | -2.062116 | 1.038490  |
| C | 2.185203  | -3.283049 | 0.621499  |
| C | 1.624143  | -3.958562 | -0.467241 |
| C | 0.529773  | -3.389645 | -1.121007 |
| C | 0.009472  | -2.164911 | -0.688931 |
| H | 2.102781  | -1.549117 | 1.888257  |
| H | -0.848538 | -1.742908 | -1.210778 |

|   |           |           |           |
|---|-----------|-----------|-----------|
| H | 3.038537  | -3.713883 | 1.145501  |
| H | 0.078694  | -3.902676 | -1.970447 |
| H | 2.032424  | -4.912725 | -0.796851 |
| H | 0.279354  | 2.600776  | 1.878929  |
| H | 1.944758  | 0.132749  | -1.201288 |
| H | 1.687737  | 4.492771  | 1.137543  |
| H | 3.353520  | 2.014763  | -1.959227 |
| H | 3.241218  | 4.215969  | -0.794396 |
| H | -2.391345 | -1.058834 | 1.878722  |
| H | -1.088385 | 1.618076  | -1.201593 |
| H | -4.734203 | -0.787099 | 1.137150  |
| H | -3.422930 | 1.895085  | -1.959942 |
| H | -5.272187 | 0.695977  | -0.795102 |
| H | -0.000539 | 0.000428  | 2.136290  |

## 20. TPB hydride. R = NH<sub>2</sub>

$E_{\text{elec}} = -1219.390041$  a.u.;  $H = -1218.935073$  a.u

|   |           |           |           |
|---|-----------|-----------|-----------|
| C | -2.427045 | 0.015516  | -0.769052 |
| C | -1.524937 | -0.542228 | 0.174511  |
| C | -2.034426 | -1.643535 | 0.917251  |
| C | -3.342883 | -2.136139 | 0.753836  |
| C | -4.203401 | -1.531901 | -0.163380 |
| C | -3.747577 | -0.456755 | -0.923679 |
| B | -0.000198 | -0.000523 | 0.534685  |
| C | 1.231955  | -1.049504 | 0.174580  |
| C | 2.440532  | -0.938087 | 0.916906  |
| C | 3.522192  | -1.824040 | 0.754108  |
| C | 3.429999  | -2.872513 | -0.161898 |
| C | 2.270844  | -3.017469 | -0.921553 |
| C | 1.200674  | -2.110901 | -0.767544 |
| N | 2.558152  | 0.069324  | 1.883390  |
| N | 4.488480  | -3.819961 | -0.277475 |
| N | 0.123920  | -2.227389 | -1.656086 |
| N | -1.222041 | -2.249497 | 1.884636  |
| N | -5.553511 | -1.973576 | -0.279791 |
| N | -1.987552 | 1.004306  | -1.658647 |
| C | 0.292769  | 1.591001  | 0.175218  |
| C | -0.405938 | 2.582346  | 0.918845  |
| C | -0.178864 | 3.961935  | 0.755716  |
| C | 0.773752  | 4.405721  | -0.162170 |
| C | 1.476789  | 3.473893  | -0.923199 |
| C | 1.226093  | 2.094000  | -0.768783 |
| N | 1.065753  | 5.795912  | -0.278254 |
| N | -1.335973 | 2.180897  | 1.886740  |
| N | 1.862490  | 1.219351  | -1.658845 |
| H | -3.689703 | -2.972323 | 1.362344  |
| H | -4.400416 | 0.001694  | -1.667735 |
| H | 4.419878  | -1.704666 | 1.362131  |
| H | 2.200697  | -3.813113 | -1.664532 |
| H | -0.729387 | 4.680018  | 1.364854  |
| H | 2.199591  | 3.810537  | -1.667664 |
| H | -2.712117 | 1.646468  | -1.959987 |
| H | -1.151985 | 1.490963  | -1.333543 |
| H | -1.404230 | -3.236912 | 2.022190  |
| H | -0.231959 | -2.050188 | 1.760363  |

|   |           |           |           |
|---|-----------|-----------|-----------|
| H | -5.919936 | -1.814015 | -1.214985 |
| H | -5.644030 | -2.961361 | -0.055577 |
| H | -2.100023 | 2.832080  | 2.025549  |
| H | -1.658170 | 1.223789  | 1.762161  |
| H | 2.780654  | 1.526065  | -1.960631 |
| H | 1.866658  | 0.252325  | -1.333945 |
| H | 1.386825  | 6.033884  | -1.213454 |
| H | 0.255458  | 6.367860  | -0.053583 |
| H | 3.504189  | 0.405517  | 2.021501  |
| H | 1.890438  | 0.826879  | 1.758051  |
| H | -0.069468 | -3.176827 | -1.955032 |
| H | -0.715497 | -1.747223 | -1.331194 |
| H | 4.533648  | -4.218195 | -1.212188 |
| H | 5.388829  | -3.403286 | -0.054010 |
| H | -0.000158 | -0.000957 | 1.767545  |

## 21. TPB hydride. R = NO<sub>2</sub>

E<sub>elec</sub> = -2562.572236 a.u.; H = -2562.236064 a.u

|   |           |           |           |
|---|-----------|-----------|-----------|
| C | 0.031138  | 2.438208  | 1.008136  |
| C | 0.412428  | 1.391118  | 0.139643  |
| C | 1.294934  | 1.842370  | -0.867827 |
| C | 1.707989  | 3.160887  | -1.037306 |
| C | 1.242335  | 4.113270  | -0.149362 |
| C | 0.418375  | 3.764062  | 0.911648  |
| B | -0.074576 | -0.147625 | 0.505497  |
| C | 1.096445  | -1.256279 | 0.212258  |
| C | 1.028243  | -2.492634 | -0.469026 |
| C | 2.066610  | -3.406115 | -0.589134 |
| C | 3.300891  | -3.075392 | -0.050619 |
| C | 3.479959  | -1.880302 | 0.631438  |
| C | 2.379274  | -1.048737 | 0.770272  |
| N | -0.214753 | -2.941347 | -1.155297 |
| O | -0.875481 | -2.106002 | -1.768281 |
| N | 4.434256  | -4.001748 | -0.200720 |
| O | 4.242829  | -5.047537 | -0.830408 |
| N | 2.679665  | 0.161273  | 1.599690  |
| O | 2.105751  | 0.281598  | 2.677320  |
| N | 1.891061  | 0.909902  | -1.874519 |
| O | 1.288168  | -0.126669 | -2.137349 |
| N | 1.647414  | 5.523890  | -0.317608 |
| O | 2.380623  | 5.800408  | -1.270898 |
| N | -0.876397 | 2.178121  | 2.164511  |
| O | -0.475606 | 2.538813  | 3.271066  |
| C | -1.634058 | -0.441078 | 0.088184  |
| C | -2.402887 | 0.269654  | -0.856957 |
| C | -3.758198 | 0.112487  | -1.090312 |
| C | -4.448231 | -0.817117 | -0.322091 |
| C | -3.805109 | -1.524624 | 0.680919  |
| C | -2.443075 | -1.318038 | 0.848167  |
| N | -5.885637 | -1.025974 | -0.554678 |
| O | -6.428071 | -0.350413 | -1.437289 |
| N | -1.797212 | 1.327295  | -1.721394 |
| O | -1.191195 | 0.970145  | -2.725338 |
| N | -1.860954 | -2.100117 | 1.971214  |
| O | -0.787298 | -2.672400 | 1.783173  |

|   |           |           |           |
|---|-----------|-----------|-----------|
| O | 2.959215  | 1.251888  | -2.393570 |
| O | -1.976079 | 1.681203  | 1.928430  |
| O | 1.224778  | 6.339800  | 0.507968  |
| O | -0.482419 | -4.146378 | -1.094935 |
| O | 3.536958  | 0.931295  | 1.154236  |
| O | 5.510946  | -3.678086 | 0.314324  |
| O | -2.007876 | 2.497300  | -1.387208 |
| O | -2.515040 | -2.149942 | 3.014989  |
| O | -6.465866 | -1.863004 | 0.145298  |
| H | 2.382681  | 3.429356  | -1.838817 |
| H | 0.093490  | 4.502527  | 1.633636  |
| H | 1.919764  | -4.346871 | -1.103149 |
| H | 4.444182  | -1.617203 | 1.048734  |
| H | -4.276172 | 0.695824  | -1.842112 |
| H | -4.350376 | -2.207228 | 1.319780  |
| H | -0.119880 | -0.143947 | 1.715635  |

## 22. TPB hydride. R = OCH<sub>3</sub>

$E_{\text{elec}} = -1752.161379$  a.u.;  $H = -1751.558243$  a.u

|   |           |           |           |
|---|-----------|-----------|-----------|
| C | -2.347230 | 0.328090  | -0.588609 |
| C | -1.554573 | -0.348055 | 0.346308  |
| C | -2.225912 | -1.399180 | 1.005163  |
| C | -3.569901 | -1.736119 | 0.793493  |
| C | -4.304759 | -0.994465 | -0.129778 |
| C | -3.707875 | 0.044829  | -0.835588 |
| B | 0.000050  | 0.002579  | 0.753562  |
| C | 1.078424  | -1.171044 | 0.344382  |
| C | 2.323069  | -1.235238 | 1.004872  |
| C | 3.282220  | -2.235099 | 0.791576  |
| C | 3.003820  | -3.237387 | -0.135774 |
| C | 1.807288  | -3.230942 | -0.844923 |
| C | 0.886448  | -2.190457 | -0.596143 |
| O | 2.561818  | -0.207100 | 1.897639  |
| C | 3.811115  | -0.170707 | 2.558709  |
| O | 3.995005  | -4.207319 | -0.291423 |
| C | 3.734794  | -5.234088 | -1.234431 |
| O | -0.278948 | -2.115191 | -1.339141 |
| C | -0.695924 | -3.248429 | -2.073063 |
| O | -1.449854 | -2.116724 | 1.895769  |
| C | -2.035877 | -3.221701 | 2.554993  |
| O | -5.638307 | -1.375146 | -0.284386 |
| C | -6.402605 | -0.639515 | -1.225627 |
| O | -1.706801 | 1.306896  | -1.329092 |
| C | -2.488312 | 2.248434  | -2.036047 |
| C | 0.475672  | 1.522742  | 0.341888  |
| C | -0.103770 | 2.632714  | 0.992192  |
| C | 0.279923  | 3.963946  | 0.780674  |
| C | 1.297949  | 4.226026  | -0.134629 |
| C | 1.903216  | 3.187051  | -0.833392 |
| C | 1.464453  | 1.868102  | -0.586947 |
| O | 1.638878  | 5.570420  | -0.288649 |
| C | 2.667149  | 5.860926  | -1.221188 |
| O | -1.121788 | 2.322891  | 1.874117  |
| C | -1.797349 | 3.385570  | 2.517360  |
| O | 1.995921  | 0.822782  | -1.322890 |

|   |           |           |           |
|---|-----------|-----------|-----------|
| C | 3.217532  | 1.020498  | -2.005649 |
| H | -4.064843 | -2.544635 | 1.319438  |
| H | -4.261680 | 0.609140  | -1.575207 |
| H | 4.228782  | -2.266446 | 1.319056  |
| H | 1.594189  | -3.989219 | -1.587719 |
| H | -0.175676 | 4.798663  | 1.301186  |
| H | 2.673924  | 3.381466  | -1.568473 |
| H | 3.786374  | 0.725881  | 3.183592  |
| H | 3.967281  | -1.055261 | 3.196734  |
| H | 4.649118  | -0.095989 | 1.847408  |
| H | -1.701459 | -3.010801 | -2.430127 |
| H | -0.042556 | -3.449676 | -2.938801 |
| H | -0.736772 | -4.149734 | -1.441925 |
| H | 4.608088  | -5.892060 | -1.210572 |
| H | 2.835299  | -5.810672 | -0.969938 |
| H | 3.609335  | -4.830884 | -2.251092 |
| H | 3.526022  | 0.028067  | -2.344948 |
| H | 3.105838  | 1.683205  | -2.880503 |
| H | 3.991236  | 1.435912  | -1.341765 |
| H | -2.568207 | 2.913767  | 3.132244  |
| H | -1.124775 | 3.972540  | 3.163119  |
| H | -2.273942 | 4.065380  | 1.793204  |
| H | 2.795714  | 6.946766  | -1.197831 |
| H | 3.615322  | 5.374537  | -0.945742 |
| H | 2.392784  | 5.547718  | -2.240281 |
| H | -1.784611 | 3.008467  | -2.385802 |
| H | -2.998151 | 1.800554  | -2.905805 |
| H | -3.242155 | 2.720218  | -1.386889 |
| H | -1.244037 | -3.645460 | 3.178180  |
| H | -2.881168 | -2.920533 | 3.194284  |
| H | -2.386607 | -3.985100 | 1.842307  |
| H | -7.406512 | -1.072761 | -1.201490 |
| H | -6.458221 | 0.427082  | -0.959617 |
| H | -5.990976 | -0.728651 | -2.242751 |
| H | 0.001491  | 0.004536  | 1.974228  |

### 23. TPB hydride. R = OCOCH<sub>3</sub>

E<sub>elec</sub> = -2772.988113 a.u.; H = -2772.285146 a.u

|   |           |           |           |
|---|-----------|-----------|-----------|
| C | 2.278654  | -0.821623 | -0.613907 |
| C | 1.610548  | -0.188532 | 0.446617  |
| C | 2.484122  | 0.273927  | 1.449351  |
| C | 3.869871  | 0.149492  | 1.420045  |
| C | 4.445887  | -0.529599 | 0.355728  |
| C | 3.656374  | -1.053589 | -0.656017 |
| B | -0.004684 | -0.068413 | 0.686649  |
| C | -0.923024 | -1.195359 | -0.085284 |
| C | -0.832815 | -2.534290 | 0.338711  |
| C | -1.746957 | -3.536223 | 0.024892  |
| C | -2.815922 | -3.213396 | -0.799615 |
| C | -2.931534 | -1.939111 | -1.332024 |
| C | -1.977783 | -0.981177 | -0.985068 |
| O | 0.189720  | -2.857798 | 1.247980  |
| C | 1.198345  | -3.741865 | 0.938263  |
| C | 1.228304  | -4.339194 | -0.450881 |
| O | -3.778871 | -4.186485 | -1.105713 |

|   |           |           |           |
|---|-----------|-----------|-----------|
| C | -4.896545 | -4.317417 | -0.291012 |
| C | -4.996888 | -3.377595 | 0.885645  |
| O | -2.185243 | 0.323114  | -1.476189 |
| C | -2.238770 | 0.604212  | -2.815428 |
| C | -1.791843 | -0.461230 | -3.790790 |
| O | 1.949514  | 0.989215  | 2.529786  |
| C | 1.691211  | 0.354934  | 3.731648  |
| C | 1.959586  | -1.125236 | 3.794748  |
| O | 5.832089  | -0.742052 | 0.333450  |
| C | 6.659519  | 0.158102  | -0.320758 |
| C | 5.992000  | 1.332506  | -0.993186 |
| O | 1.485175  | -1.350707 | -1.649577 |
| C | 1.830013  | -1.339329 | -2.978207 |
| C | 2.880150  | -0.369200 | -3.475413 |
| C | -0.631673 | 1.445508  | 0.668390  |
| C | 0.001502  | 2.651824  | 0.338737  |
| C | -0.602143 | 3.910571  | 0.383441  |
| C | -1.933696 | 3.993923  | 0.757856  |
| C | -2.625014 | 2.853512  | 1.147241  |
| C | -1.958544 | 1.634867  | 1.110088  |
| O | 1.368122  | 2.685458  | -0.027293 |
| C | 1.749807  | 2.429760  | -1.310054 |
| C | 0.662852  | 2.044379  | -2.279538 |
| O | -2.728883 | 0.507059  | 1.440871  |
| C | -2.701096 | -0.027356 | 2.712828  |
| C | -1.994949 | 0.779797  | 3.770900  |
| O | -2.583733 | 5.237574  | 0.785949  |
| C | -3.193072 | 5.716684  | -0.362772 |
| C | -3.067893 | 4.872376  | -1.609321 |
| O | -2.604034 | 1.712986  | -3.145735 |
| O | -5.703497 | -5.167359 | -0.581326 |
| O | 2.006563  | -3.994826 | 1.802334  |
| O | 1.218341  | -2.083796 | -3.714207 |
| O | 1.260998  | 1.029184  | 4.638911  |
| O | 7.846631  | -0.061975 | -0.313836 |
| O | -3.290217 | -1.067381 | 2.898426  |
| O | 2.929681  | 2.505720  | -1.588232 |
| O | -3.768464 | 6.776279  | -0.294968 |
| H | -3.663824 | 2.905976  | 1.455082  |
| H | -0.038377 | 4.797138  | 0.112992  |
| H | -1.656008 | -4.530103 | 0.449714  |
| H | -3.775398 | -1.682806 | -1.963756 |
| H | 4.480240  | 0.562130  | 2.216186  |
| H | 4.111694  | -1.630217 | -1.452742 |
| H | -1.035262 | -1.128097 | -3.373977 |
| H | -2.649937 | -1.074541 | -4.084508 |
| H | -1.413460 | 0.043907  | -4.680945 |
| H | -5.917775 | -3.600875 | 1.423596  |
| H | -4.135523 | -3.477479 | 1.552243  |
| H | -4.993526 | -2.333752 | 0.558158  |
| H | 0.589890  | -5.228957 | -0.475283 |
| H | 0.871862  | -3.645774 | -1.213519 |
| H | 2.255727  | -4.644620 | -0.653832 |
| H | 3.074681  | 0.458005  | -2.791626 |
| H | 3.814226  | -0.911822 | -3.653905 |

|   |           |           |           |
|---|-----------|-----------|-----------|
| H | 2.530558  | 0.005399  | -4.440281 |
| H | 1.392006  | -1.646458 | 3.018355  |
| H | 3.016893  | -1.342644 | 3.615915  |
| H | 1.667648  | -1.486015 | 4.780770  |
| H | 5.340064  | 1.879073  | -0.306546 |
| H | 6.767995  | 1.987045  | -1.389236 |
| H | 5.343678  | 0.990482  | -1.805490 |
| H | 0.293664  | 1.051711  | -2.002282 |
| H | -0.193490 | 2.720154  | -2.225924 |
| H | 1.072522  | 2.025595  | -3.288634 |
| H | -1.011655 | 1.113707  | 3.435621  |
| H | -2.586979 | 1.675528  | 3.993520  |
| H | -1.897381 | 0.173098  | 4.670245  |
| H | -3.360147 | 3.832530  | -1.440150 |
| H | -3.684421 | 5.319734  | -2.388475 |
| H | -2.024003 | 4.845761  | -1.938680 |
| H | -0.145394 | -0.404753 | 1.853963  |

#### 24. TPB hydride. R = OH

$E_{\text{elec}} = -1398.230880$  a.u.;  $H = -1397.891361$  a.u

|   |           |           |           |
|---|-----------|-----------|-----------|
| C | 0.909744  | -2.127162 | 0.742336  |
| C | 0.111888  | -1.580659 | -0.272206 |
| C | -0.621450 | -2.545410 | -0.985205 |
| C | -0.564114 | -3.930591 | -0.753273 |
| C | 0.266970  | -4.402127 | 0.253416  |
| C | 1.010491  | -3.505316 | 1.013324  |
| B | 0.000034  | 0.004706  | -0.693439 |
| C | -1.429008 | 0.697721  | -0.270649 |
| C | -1.909704 | 1.805210  | -0.991130 |
| C | -3.141615 | 2.440954  | -0.758583 |
| C | -3.956661 | 1.960137  | 0.256754  |
| C | -3.539302 | 0.878424  | 1.025098  |
| C | -2.292306 | 0.283627  | 0.753100  |
| O | -1.096935 | 2.308520  | -1.993078 |
| O | -5.180368 | 2.595687  | 0.475446  |
| O | -1.881820 | -0.759671 | 1.566356  |
| O | -1.469722 | -2.086915 | -1.979227 |
| O | 0.320084  | -5.780033 | 0.471962  |
| O | 1.624291  | -1.255640 | 1.547601  |
| C | 1.317980  | 0.892681  | -0.273956 |
| C | 2.520806  | 0.733339  | -0.984465 |
| C | 3.694035  | 1.471907  | -0.753057 |
| C | 3.688650  | 2.431015  | 0.250207  |
| C | 2.539471  | 2.633747  | 1.007090  |
| C | 1.393795  | 1.860906  | 0.736690  |
| O | 4.857887  | 3.162106  | 0.468443  |
| O | 2.545847  | -0.234570 | -1.974501 |
| O | 0.280769  | 2.051682  | 1.538896  |
| H | -1.151827 | -4.631859 | -1.343940 |
| H | 1.652988  | -3.864835 | 1.821123  |
| H | -3.464270 | 3.293183  | -1.354978 |
| H | -4.164545 | 0.504791  | 1.839985  |
| H | 4.595701  | 1.307956  | -1.341457 |
| H | 2.530695  | 3.373161  | 1.811922  |
| H | -1.556409 | 3.072555  | -2.375739 |



|   |           |           |           |
|---|-----------|-----------|-----------|
| H | -5.613333 | 2.126030  | 1.205362  |
| H | -2.607711 | -0.955533 | 2.178785  |
| H | 0.479991  | 2.781477  | 2.145584  |
| H | 3.442055  | -0.239221 | -2.346084 |
| H | 4.669357  | 3.783246  | 1.189176  |
| H | 2.157068  | -1.790790 | 2.155982  |
| H | -1.917304 | -2.862725 | -2.352169 |
| H | 0.950142  | -5.924787 | 1.195070  |
| H | -0.001053 | 0.004075  | -1.909557 |

## 25. TPB hydride. R = SO<sub>3</sub>H

$E_{\text{elec}} = -6337.105317$  a.u.;  $H = -6336.642779$  a.u

|   |           |           |           |
|---|-----------|-----------|-----------|
| C | -1.007709 | 1.923141  | 1.526069  |
| C | 0.092092  | 1.522943  | 0.755623  |
| C | 0.735080  | 2.595841  | 0.099583  |
| C | 0.090360  | 3.813993  | -0.093198 |
| C | -1.192725 | 4.000608  | 0.430095  |
| C | -1.717025 | 3.106926  | 1.358547  |
| B | 0.151847  | -0.149372 | 0.781705  |
| O | -0.189842 | -0.307289 | 2.315290  |
| S | -1.203363 | 0.754977  | 2.852192  |
| O | -2.540466 | 0.142021  | 2.904846  |
| S | 2.500122  | 2.525055  | -0.275327 |
| O | 2.852205  | 4.103189  | -0.395074 |
| S | -2.183786 | 5.330398  | -0.213403 |
| O | -3.508952 | 5.198965  | 0.346847  |
| C | 1.568966  | -0.762196 | 0.209491  |
| C | 2.789774  | -1.006954 | 1.105022  |
| C | 4.032524  | -1.021617 | 0.467480  |
| C | 4.063097  | -1.231848 | -0.908580 |
| C | 2.938252  | -1.823750 | -1.550749 |
| C | 1.712234  | -1.806143 | -0.941035 |
| S | 2.887982  | -0.825945 | 2.778322  |
| O | 1.881561  | -1.707437 | 3.561624  |
| S | 0.494778  | -2.798455 | -1.721836 |
| O | -0.199087 | -2.106370 | -2.805032 |
| S | 5.526720  | -0.957269 | -1.815203 |
| O | 5.079156  | 0.285536  | -2.773297 |
| C | -1.241860 | -0.767582 | 0.091767  |
| C | -1.941000 | -0.216979 | -1.002951 |
| C | -3.243543 | -0.562760 | -1.374224 |
| C | -3.888872 | -1.565584 | -0.671658 |
| C | -3.225503 | -2.238518 | 0.348256  |
| C | -1.939961 | -1.844565 | 0.706238  |
| S | -1.185532 | 0.892858  | -2.192597 |
| O | -1.953795 | 2.123814  | -2.270158 |
| S | -5.526239 | -2.071309 | -1.143386 |
| O | -6.114882 | -2.804202 | -0.045229 |
| S | -1.298649 | -2.972261 | 1.989872  |
| O | -1.980960 | -2.421347 | 3.311393  |
| O | -1.498059 | 0.121458  | -3.549056 |
| O | 0.244609  | 0.929465  | -2.009002 |
| O | -6.191623 | -0.974682 | -1.793953 |
| O | -5.224113 | -3.127479 | -2.345670 |
| O | 0.157528  | -2.916562 | 2.100762  |

|   |           |           |           |
|---|-----------|-----------|-----------|
| O | -1.862274 | -4.277797 | 1.758738  |
| O | 1.365869  | -3.887911 | -2.563834 |
| O | -0.310078 | -3.530989 | -0.769782 |
| O | 6.560877  | -0.504483 | -0.906486 |
| O | 5.795079  | -2.021664 | -2.757358 |
| O | 4.208842  | -1.007270 | 3.318095  |
| O | 2.326721  | 0.618027  | 3.162152  |
| O | -1.476502 | 6.586109  | -0.162819 |
| O | -2.182620 | 4.930396  | -1.772372 |
| O | 3.135797  | 2.092014  | 0.954197  |
| O | 2.889162  | 1.932952  | -1.539507 |
| O | -0.731957 | 1.370953  | 4.067319  |
| H | 3.110673  | -2.352994 | -2.481925 |
| H | 4.959842  | -0.899065 | 1.016671  |
| H | -3.731757 | -0.072429 | -2.209545 |
| H | -3.704528 | -3.066844 | 0.857795  |
| H | 0.549129  | 4.611968  | -0.663495 |
| H | -2.647793 | 3.313562  | 1.875923  |
| H | 1.127135  | -2.093207 | 2.979656  |
| H | -4.972755 | -3.980324 | -1.941561 |
| H | -0.982643 | -0.737151 | -3.480658 |
| H | 2.629245  | 1.246326  | 2.453222  |
| H | 4.537888  | 0.906872  | -2.239179 |
| H | 1.764516  | -4.499127 | -1.914706 |
| H | -2.221759 | -1.442343 | 3.217714  |
| H | 3.059486  | 4.278879  | -1.333033 |
| H | -2.317225 | 3.957121  | -1.893664 |
| H | 1.886154  | 0.121791  | -0.365582 |

## 26. TPB NMR. R = CF<sub>3</sub>

E<sub>elec</sub> = -4409.671311 a.u.; H = -4409.098942 a.u

|   |           |           |           |
|---|-----------|-----------|-----------|
| C | 1.510854  | 1.698715  | 1.369993  |
| C | 0.878686  | 0.435475  | 1.132531  |
| C | 1.700802  | -0.642323 | 1.606038  |
| C | 3.057751  | -0.519701 | 1.905653  |
| C | 3.685430  | 0.712695  | 1.829133  |
| C | 2.879615  | 1.822014  | 1.657990  |
| B | -0.357783 | 0.160393  | -0.072065 |
| C | 0.762447  | -0.641969 | -1.120523 |
| C | 1.807061  | 0.133492  | -1.742901 |
| C | 3.095425  | -0.359610 | -1.953240 |
| C | 3.397793  | -1.687736 | -1.697179 |
| C | 2.347403  | -2.536812 | -1.411747 |
| C | 1.061445  | -2.043188 | -1.147985 |
| C | 1.641117  | 1.534667  | -2.318540 |
| F | 0.485845  | 1.675591  | -3.034870 |
| C | 4.810297  | -2.197499 | -1.771625 |
| F | 4.869821  | -3.480659 | -2.212864 |
| C | 0.094911  | -3.229369 | -1.093876 |
| F | 0.613718  | -4.304178 | -0.440165 |
| C | 1.215795  | -2.027990 | 1.993356  |
| F | -0.041719 | -2.322722 | 1.612292  |
| C | 5.175867  | 0.851427  | 1.968805  |
| F | 5.727232  | -0.179436 | 2.654623  |
| C | 0.887582  | 3.074387  | 1.575334  |

|   |           |           |           |
|---|-----------|-----------|-----------|
| F | 1.549871  | 4.058328  | 0.885268  |
| C | -1.858717 | -0.510337 | 0.286381  |
| C | -2.436768 | -0.534135 | 1.598073  |
| C | -3.673404 | -1.120010 | 1.879918  |
| C | -4.459514 | -1.649612 | 0.869002  |
| C | -4.003185 | -1.559730 | -0.430552 |
| C | -2.745461 | -1.012462 | -0.717227 |
| C | -1.834656 | 0.156862  | 2.822286  |
| F | -0.775003 | -0.462897 | 3.378682  |
| C | -2.519786 | -1.128369 | -2.225782 |
| F | -2.556318 | -2.412003 | -2.653096 |
| C | -5.814378 | -2.228894 | 1.180627  |
| F | -6.225407 | -3.108670 | 0.234667  |
| F | -3.566540 | -0.524386 | -2.896498 |
| F | -1.391069 | -0.576059 | -2.709470 |
| F | -6.766633 | -1.251231 | 1.249903  |
| F | -5.828976 | -2.871876 | 2.374537  |
| F | -1.455591 | 1.426309  | 2.531744  |
| F | -2.751376 | 0.282230  | 3.827574  |
| F | 1.687903  | 2.547605  | -1.412961 |
| F | 2.628334  | 1.823363  | -3.213264 |
| F | -1.119660 | -3.026346 | -0.557853 |
| F | -0.107948 | -3.650010 | -2.382695 |
| F | 5.406679  | -2.177953 | -0.544423 |
| F | 5.586118  | -1.447557 | -2.595559 |
| F | 1.258970  | -2.155062 | 3.352626  |
| F | 2.026758  | -3.018313 | 1.523478  |
| F | 5.525687  | 2.000031  | 2.607016  |
| F | 5.783597  | 0.885555  | 0.747147  |
| F | -0.420934 | 3.258141  | 1.297182  |
| F | 1.019073  | 3.406543  | 2.894438  |
| P | -1.759594 | 2.607606  | -1.102881 |
| C | -3.079000 | 2.741118  | 0.153883  |
| C | -4.401499 | 3.401654  | -0.268576 |
| C | -2.590846 | 2.240045  | -2.680044 |
| C | -3.098450 | 3.449334  | -3.487532 |
| C | -0.869619 | 4.178369  | -1.375295 |
| C | -1.629656 | 5.459676  | -0.997597 |
| H | 2.522194  | -3.604758 | -1.367658 |
| H | 3.867700  | 0.294493  | -2.335960 |
| H | 3.620000  | -1.399451 | 2.197449  |
| H | 3.309972  | 2.811604  | 1.762954  |
| H | -4.611432 | -1.945770 | -1.240975 |
| H | -4.036198 | -1.146261 | 2.898965  |
| H | -1.878392 | 1.666578  | -3.275274 |
| H | -3.421954 | 1.572569  | -2.449562 |
| H | 0.058836  | 4.117267  | -0.815286 |
| H | -0.591054 | 4.180623  | -2.434134 |
| H | -3.263924 | 1.698998  | 0.436713  |
| H | -2.661304 | 3.227874  | 1.036500  |
| H | -0.976630 | 6.320789  | -1.167684 |
| H | -2.532405 | 5.604343  | -1.596355 |
| H | -1.907530 | 5.458225  | 0.060257  |
| H | -5.099022 | 3.353449  | 0.573146  |
| H | -4.275811 | 4.453610  | -0.534777 |

|   |           |          |           |
|---|-----------|----------|-----------|
| H | -4.867081 | 2.881760 | -1.110279 |
| H | -3.599751 | 3.078107 | -4.386457 |
| H | -3.819599 | 4.053796 | -2.932676 |
| H | -2.280343 | 4.098237 | -3.810656 |
| O | -0.725923 | 1.524713 | -0.699313 |

## 27. TPB NMR. R = CH<sub>3</sub>

$E_{\text{elec}} = -1728.788448$  a.u.;  $H = -1728.025176$  a.u

|   |           |           |           |
|---|-----------|-----------|-----------|
| C | 0.227396  | 2.604952  | -0.473095 |
| C | 0.675205  | 1.411771  | -1.099972 |
| C | 1.754797  | 1.555332  | -2.015158 |
| C | 2.407890  | 2.783186  | -2.169889 |
| C | 2.033937  | 3.924796  | -1.459754 |
| C | 0.915207  | 3.815068  | -0.637621 |
| B | 0.010412  | -0.041913 | -0.723909 |
| O | -0.013990 | 0.050672  | 0.972378  |
| P | -0.037058 | 0.139593  | 2.475630  |
| C | 1.095424  | 1.462564  | 3.036704  |
| C | 0.795840  | 2.134677  | 4.385069  |
| C | 2.236553  | 0.433624  | -2.915977 |
| C | 2.793663  | 5.222296  | -1.596801 |
| C | -1.061540 | 2.703133  | 0.326337  |
| C | 0.959302  | -1.363849 | -0.941580 |
| C | 0.608355  | -2.433580 | -1.811200 |
| C | 1.354123  | -3.617413 | -1.832041 |
| C | 2.477904  | -3.808458 | -1.027057 |
| C | 2.883751  | -2.728083 | -0.247568 |
| C | 2.169441  | -1.522613 | -0.215390 |
| C | -0.538564 | -2.358697 | -2.801441 |
| C | 2.839879  | -0.399332 | 0.558704  |
| C | 3.229993  | -5.117599 | -1.021510 |
| C | -1.590055 | -0.224274 | -1.041912 |
| C | -2.277207 | 0.547489  | -2.019639 |
| C | -3.670524 | 0.488260  | -2.133324 |
| C | -4.453838 | -0.330583 | -1.318801 |
| C | -3.778782 | -1.161893 | -0.428461 |
| C | -2.383010 | -1.140698 | -0.301486 |
| C | -1.569666 | 1.431838  | -3.029152 |
| C | -5.960392 | -0.330587 | -1.417842 |
| C | -1.803079 | -2.224236 | 0.592900  |
| C | 0.498207  | -1.454374 | 3.197129  |
| C | 1.131391  | -1.427580 | 4.596328  |
| C | -1.732548 | 0.516921  | 3.051358  |
| C | -2.124282 | 0.060211  | 4.464683  |
| H | -4.348209 | -1.877804 | 0.166187  |
| H | -4.158007 | 1.098814  | -2.893494 |
| H | 3.804919  | -2.806942 | 0.331766  |
| H | 1.048794  | -4.414046 | -2.510559 |
| H | 0.538877  | 4.704765  | -0.130465 |
| H | 3.232859  | 2.849013  | -2.879363 |
| H | 2.938826  | -0.645377 | 1.625446  |
| H | 3.860363  | -0.259145 | 0.181220  |
| H | 2.321612  | 0.552402  | 0.462697  |
| H | 3.229044  | -5.582124 | -2.013648 |
| H | 4.270303  | -4.978326 | -0.708619 |

|   |           |           |           |
|---|-----------|-----------|-----------|
| H | 2.769362  | -5.832833 | -0.326766 |
| H | -0.367272 | -3.072412 | -3.614873 |
| H | -1.503362 | -2.598463 | -2.342338 |
| H | -0.640632 | -1.363198 | -3.239736 |
| H | -2.140876 | -2.114478 | 1.633146  |
| H | -2.165087 | -3.203314 | 0.255288  |
| H | -0.715752 | -2.253959 | 0.575997  |
| H | -2.213957 | 1.577770  | -3.903209 |
| H | -1.327506 | 2.419178  | -2.622176 |
| H | -0.627906 | 0.996064  | -3.371094 |
| H | -6.291949 | -0.186444 | -2.452018 |
| H | -6.383987 | -1.271000 | -1.049522 |
| H | -6.393798 | 0.483127  | -0.820843 |
| H | 2.746933  | 0.857754  | -3.787779 |
| H | 2.938787  | -0.236751 | -2.409416 |
| H | 1.414060  | -0.189699 | -3.274510 |
| H | -0.872819 | 3.019920  | 1.361820  |
| H | -1.703775 | 3.474151  | -0.117113 |
| H | -1.627216 | 1.774021  | 0.338313  |
| H | 3.166526  | 5.360039  | -2.617662 |
| H | 2.164062  | 6.081594  | -1.342382 |
| H | 3.664054  | 5.241010  | -0.927119 |
| H | 2.104948  | 1.037760  | 3.024802  |
| H | 1.065036  | 2.193013  | 2.219350  |
| H | -0.372493 | -2.118417 | 3.171876  |
| H | 1.202381  | -1.850485 | 2.455769  |
| H | -1.870656 | 1.597158  | 2.935295  |
| H | -2.373533 | 0.046909  | 2.295898  |
| H | -3.170998 | 0.317252  | 4.655314  |
| H | -2.024990 | -1.023621 | 4.578542  |
| H | -1.518214 | 0.541888  | 5.237172  |
| H | 1.436571  | -2.439827 | 4.879587  |
| H | 2.024024  | -0.794973 | 4.620612  |
| H | 0.435159  | -1.065281 | 5.357955  |
| H | 1.527773  | 2.927299  | 4.569570  |
| H | -0.197127 | 2.594606  | 4.392281  |
| H | 0.851966  | 1.430094  | 5.219634  |

## 28. TPB NMR. R = CN

$E_{\text{elec}} = -2205.421134$  a.u.;  $H = -2204.915715$  a.u

|   |           |           |           |
|---|-----------|-----------|-----------|
| C | -2.047092 | -1.786911 | 0.176044  |
| C | -1.582475 | -0.635318 | -0.510895 |
| C | -2.517115 | -0.076656 | -1.416997 |
| C | -3.815844 | -0.584239 | -1.580821 |
| C | -4.240734 | -1.689463 | -0.841826 |
| C | -3.339632 | -2.304436 | 0.030897  |
| B | -0.081573 | -0.027886 | -0.212084 |
| P | 0.534619  | -0.008037 | 2.809705  |
| C | 0.667216  | 1.731257  | 3.311980  |
| C | 1.315398  | 1.973752  | 4.685630  |
| C | -2.217209 | 1.030023  | -2.279368 |
| N | -2.077268 | 1.905217  | -3.031647 |
| C | -5.569094 | -2.196988 | -0.987149 |
| N | -6.650285 | -2.608318 | -1.095756 |
| C | -1.181875 | -2.574091 | 1.000669  |

|   |           |           |           |
|---|-----------|-----------|-----------|
| N | -0.542457 | -3.298745 | 1.646707  |
| C | 0.038607  | 1.550930  | -0.660216 |
| C | -0.693224 | 2.546775  | 0.033336  |
| C | -0.577988 | 3.916072  | -0.239518 |
| C | 0.271809  | 4.350927  | -1.259623 |
| C | 0.948101  | 3.400656  | -2.029069 |
| C | 0.821091  | 2.035853  | -1.737993 |
| C | -1.689501 | 2.200110  | 1.001373  |
| N | -2.547234 | 2.000207  | 1.760355  |
| C | 1.481593  | 1.165710  | -2.667527 |
| N | 2.018174  | 0.533631  | -3.482485 |
| C | 0.418570  | 5.746518  | -1.531585 |
| N | 0.541820  | 6.882617  | -1.741663 |
| C | 1.167912  | -0.929782 | -0.780823 |
| C | 1.065457  | -2.072392 | -1.607716 |
| C | 2.182855  | -2.830545 | -1.991996 |
| C | 3.464763  | -2.462349 | -1.576243 |
| C | 3.623147  | -1.308309 | -0.803598 |
| C | 2.496240  | -0.569874 | -0.426673 |
| C | -0.175517 | -2.512105 | -2.177211 |
| N | -1.125654 | -2.924289 | -2.704613 |
| C | 4.603270  | -3.242281 | -1.949069 |
| N | 5.531723  | -3.877909 | -2.238668 |
| C | 2.761659  | 0.639131  | 0.293831  |
| N | 3.028684  | 1.615035  | 0.868017  |
| C | 2.144685  | -0.790739 | 3.142100  |
| C | 2.308643  | -2.252217 | 2.696788  |
| C | -0.628756 | -0.861181 | 3.909147  |
| C | -2.102307 | -0.452155 | 3.792805  |
| H | 1.565137  | 3.715909  | -2.863127 |
| H | -1.163015 | 4.632440  | 0.326993  |
| H | 2.046975  | -3.700987 | -2.624470 |
| H | 4.613525  | -0.978764 | -0.509014 |
| H | -4.488553 | -0.111771 | -2.288113 |
| H | -3.631237 | -3.192249 | 0.581219  |
| H | 2.256165  | -0.711147 | 4.232287  |
| H | 2.913298  | -0.148030 | 2.704787  |
| H | 3.332754  | -2.575439 | 2.906941  |
| H | 1.622209  | -2.918892 | 3.221625  |
| H | 2.123068  | -2.368846 | 1.627993  |
| H | 1.239422  | 2.225526  | 2.518950  |
| H | -0.352440 | 2.129078  | 3.284154  |
| H | 1.278610  | 3.042150  | 4.916881  |
| H | 0.789980  | 1.444341  | 5.487236  |
| H | 2.365089  | 1.668214  | 4.695150  |
| H | -0.245611 | -0.681265 | 4.923111  |
| H | -0.505080 | -1.929726 | 3.704516  |
| H | -2.701387 | -1.072887 | 4.465696  |
| H | -2.260921 | 0.595750  | 4.056319  |
| H | -2.471224 | -0.591425 | 2.774739  |
| O | 0.050423  | -0.092278 | 1.349642  |

## 29. TPB NMR. R = 5F

$E_{\text{elec}} = -2864.048755$  a.u.;  $H = -2863.653054$  a.u

|   |           |           |           |
|---|-----------|-----------|-----------|
| C | -0.309403 | -2.517502 | -0.377188 |
|---|-----------|-----------|-----------|

|   |           |           |           |
|---|-----------|-----------|-----------|
| C | -0.635013 | -1.236115 | -0.825180 |
| C | -1.562474 | -1.219269 | -1.870125 |
| C | -2.147322 | -2.369630 | -2.402249 |
| C | -1.803690 | -3.617952 | -1.893365 |
| C | -0.866993 | -3.693271 | -0.865593 |
| B | 0.059459  | 0.085210  | -0.145198 |
| O | -0.074327 | -0.061662 | 1.408725  |
| P | -0.441137 | -0.645846 | 2.764443  |
| C | -1.985224 | -1.600445 | 2.710897  |
| C | -2.353236 | -2.313483 | 4.023137  |
| F | -1.938244 | -0.056155 | -2.449930 |
| F | -2.360708 | -4.734057 | -2.388340 |
| F | 0.633556  | -2.669879 | 0.599950  |
| C | -0.731936 | 1.481159  | -0.480900 |
| C | -2.040196 | 1.667839  | -0.030030 |
| C | -2.779089 | 2.830036  | -0.212159 |
| C | -2.205954 | 3.890761  | -0.909518 |
| C | -0.914812 | 3.752231  | -1.408076 |
| C | -0.212476 | 2.565361  | -1.191084 |
| F | -2.679758 | 0.652259  | 0.619631  |
| F | 1.025724  | 2.514203  | -1.735663 |
| F | -2.893811 | 5.027233  | -1.102938 |
| C | 1.676263  | 0.178484  | -0.385469 |
| C | 2.461658  | 1.008463  | 0.421763  |
| C | 3.844154  | 1.114178  | 0.317912  |
| C | 4.511706  | 0.373853  | -0.654857 |
| C | 3.776759  | -0.447992 | -1.502777 |
| C | 2.391227  | -0.524715 | -1.356291 |
| F | 1.878123  | 1.789507  | 1.370786  |
| F | 5.846321  | 0.458225  | -0.775442 |
| F | 1.753568  | -1.329268 | -2.241312 |
| C | 0.860402  | -1.725393 | 3.437290  |
| C | 2.280310  | -1.224897 | 3.125145  |
| C | -0.611488 | 0.733782  | 3.932993  |
| C | -1.500701 | 1.878355  | 3.424574  |
| H | -2.771685 | -0.907269 | 2.398415  |
| H | -1.857295 | -2.319027 | 1.892636  |
| H | -3.295163 | -2.854178 | 3.893059  |
| H | -1.590377 | -3.039958 | 4.318425  |
| H | -2.489923 | -1.604258 | 4.845803  |
| H | -0.981661 | 0.319680  | 4.879540  |
| H | 0.407965  | 1.095045  | 4.116032  |
| H | -1.540144 | 2.674816  | 4.173335  |
| H | -1.093590 | 2.294149  | 2.499676  |
| H | -2.523573 | 1.544436  | 3.228375  |
| H | 0.686482  | -1.785268 | 4.519695  |
| H | 0.706564  | -2.726653 | 3.023389  |
| H | 3.014187  | -1.880444 | 3.602708  |
| H | 2.456281  | -1.232244 | 2.047520  |
| H | 2.446205  | -0.206396 | 3.489323  |
| F | -0.355084 | 4.764660  | -2.094568 |
| F | -4.033783 | 2.937735  | 0.268448  |
| F | -3.041101 | -2.283839 | -3.403185 |
| F | -0.507404 | -4.892229 | -0.365701 |
| F | 4.540627  | 1.922873  | 1.140738  |

F 4.408117 -1.159105 -2.454861

### 30. TPB NMR. R = F

$E_{elec} = -2268.393136$  a.u.;  $H = -2267.955268$  a.u

|   |           |           |           |
|---|-----------|-----------|-----------|
| C | -0.463306 | 2.625482  | -0.196761 |
| C | 0.515733  | 1.674393  | -0.498682 |
| C | 1.703310  | 2.265332  | -0.943427 |
| C | 1.938102  | 3.635046  | -1.046589 |
| C | 0.902831  | 4.482766  | -0.690873 |
| C | -0.327733 | 4.004999  | -0.262228 |
| B | 0.235507  | 0.073967  | -0.314246 |
| P | -1.232322 | -0.379354 | 2.312830  |
| C | -1.007432 | -2.072234 | 2.945959  |
| C | 0.465608  | -2.513014 | 2.952753  |
| F | 2.737935  | 1.473893  | -1.336280 |
| F | 1.090910  | 5.825424  | -0.773723 |
| F | -1.703137 | 2.176062  | 0.187213  |
| C | 1.592033  | -0.835806 | -0.315975 |
| C | 2.549743  | -0.724150 | 0.700248  |
| C | 3.713958  | -1.473559 | 0.814089  |
| C | 3.954607  | -2.404912 | -0.185652 |
| C | 3.090832  | -2.579798 | -1.254026 |
| C | 1.948689  | -1.783144 | -1.280137 |
| F | 2.357914  | 0.209219  | 1.681694  |
| F | 1.143650  | -1.962671 | -2.365008 |
| F | 5.080535  | -3.162480 | -0.117934 |
| C | -0.962126 | -0.507860 | -1.265951 |
| C | -1.534847 | 0.131293  | -2.372076 |
| C | -2.577491 | -0.370273 | -3.148723 |
| C | -3.080412 | -1.614528 | -2.808090 |
| C | -2.568920 | -2.350839 | -1.748323 |
| C | -1.529285 | -1.764845 | -1.038970 |
| F | -1.053450 | 1.338370  | -2.770427 |
| F | -4.098142 | -2.138197 | -3.538154 |
| F | -1.019782 | -2.523960 | -0.012519 |
| C | -0.856048 | 0.727494  | 3.704718  |
| C | -0.767636 | 2.209650  | 3.312530  |
| C | -2.975989 | -0.188003 | 1.838362  |
| C | -3.992812 | -0.619622 | 2.908026  |
| H | 3.292449  | -3.295239 | -2.041850 |
| H | 4.404487  | -1.322773 | 1.634871  |
| H | -2.966525 | 0.192083  | -3.988806 |
| H | -2.940669 | -3.337878 | -1.501644 |
| H | 2.890772  | 4.012652  | -1.397409 |
| H | -1.145572 | 4.669040  | -0.010689 |
| H | -3.107661 | 0.861646  | 1.559795  |
| H | -3.096749 | -0.770862 | 0.917583  |
| H | -5.008647 | -0.463521 | 2.532907  |
| H | -3.890838 | -1.679370 | 3.160897  |
| H | -3.886886 | -0.036234 | 3.828504  |
| H | -1.610760 | 0.555084  | 4.482677  |
| H | 0.104700  | 0.381236  | 4.105207  |
| H | -0.504183 | 2.809632  | 4.188782  |
| H | -0.001355 | 2.356890  | 2.547683  |
| H | -1.717361 | 2.581261  | 2.917157  |



|   |           |           |          |
|---|-----------|-----------|----------|
| H | -1.436977 | -2.091558 | 3.956246 |
| H | -1.604472 | -2.742233 | 2.319993 |
| H | 0.549567  | -3.513867 | 3.386663 |
| H | 0.858534  | -2.538945 | 1.934437 |
| H | 1.092559  | -1.834010 | 3.538967 |
| O | -0.272934 | -0.039588 | 1.186479 |

### 31. TPB NMR: R = H

$E_{\text{elec}} = -1374.773745$  a.u.;  $H = -1374.269935$  a.u

|   |           |           |           |
|---|-----------|-----------|-----------|
| C | 3.273461  | -1.114908 | -0.067468 |
| C | 2.164035  | -0.617988 | -0.775879 |
| C | 2.265371  | -0.599510 | -2.176381 |
| C | 3.408445  | -1.055186 | -2.838871 |
| C | 4.493601  | -1.543667 | -2.110924 |
| C | 4.420779  | -1.570994 | -0.716213 |
| B | 0.884258  | -0.053910 | 0.035021  |
| C | 1.176816  | 1.440757  | 0.591374  |
| C | 0.941647  | 2.588632  | -0.187728 |
| C | 1.248585  | 3.871855  | 0.267417  |
| C | 1.818532  | 4.048889  | 1.529704  |
| C | 2.083873  | 2.928312  | 2.318274  |
| C | 1.767247  | 1.650938  | 1.851381  |
| C | 0.298267  | -1.108444 | 1.133214  |
| C | 0.364739  | -2.493322 | 0.883613  |
| C | -0.267125 | -3.427786 | 1.704812  |
| C | -0.989995 | -3.002413 | 2.822689  |
| C | -1.049179 | -1.639142 | 3.117796  |
| C | -0.408175 | -0.716177 | 2.285906  |
| H | -1.588056 | -1.295859 | 3.998528  |
| H | -0.196897 | -4.489191 | 1.476457  |
| H | 1.053126  | 4.735080  | -0.365896 |
| H | 2.538268  | 3.049594  | 3.299314  |
| H | 3.452352  | -1.028189 | -3.926006 |
| H | 5.259232  | -1.949428 | -0.135256 |
| H | -1.486312 | -3.725783 | 3.465032  |
| H | -0.455399 | 0.339704  | 2.546244  |
| H | 0.922102  | -2.838708 | 0.015108  |
| H | 1.430526  | -0.221659 | -2.762327 |
| H | 3.234218  | -1.150654 | 1.020403  |
| H | 5.384854  | -1.899099 | -2.622423 |
| H | 2.061042  | 5.045683  | 1.889678  |
| H | 1.986441  | 0.792193  | 2.483348  |
| H | 0.518392  | 2.471165  | -1.184062 |
| O | -0.280726 | 0.091319  | -1.091454 |
| P | -1.807579 | 0.174857  | -0.927423 |
| C | -2.424825 | 0.658660  | -2.574441 |
| C | -2.283093 | 1.454956  | 0.281099  |
| C | -2.514789 | -1.443699 | -0.471446 |
| H | -1.848844 | -2.161057 | -0.965021 |
| H | -2.346996 | -1.572253 | 0.603656  |
| C | -3.979125 | -1.719838 | -0.846836 |
| H | -1.456506 | 1.463013  | 0.998515  |
| H | -2.225531 | 2.414727  | -0.246013 |
| C | -3.627493 | 1.281346  | 1.001737  |
| C | -3.817016 | 1.307050  | -2.643777 |

|   |           |           |           |
|---|-----------|-----------|-----------|
| H | -1.660554 | 1.351573  | -2.946488 |
| H | -2.369783 | -0.235679 | -3.206935 |
| H | -3.764506 | 2.100286  | 1.714587  |
| H | -4.475977 | 1.295274  | 0.311235  |
| H | -3.652161 | 0.343465  | 1.564684  |
| H | -4.246405 | -2.728548 | -0.516944 |
| H | -4.669863 | -1.021384 | -0.367216 |
| H | -4.137296 | -1.673430 | -1.928770 |
| H | -4.045577 | 1.573831  | -3.680181 |
| H | -4.604590 | 0.636963  | -2.290477 |
| H | -3.858595 | 2.224568  | -2.049213 |

### 32. TPB NMR. R = NH<sub>2</sub>

$E_{\text{elec}} = -1873.287043$  a.u.;  $H = -1872.623706$  a.u

|   |           |           |           |
|---|-----------|-----------|-----------|
| C | 1.779073  | -2.411943 | -0.931188 |
| C | 1.556422  | -1.189035 | -0.226691 |
| C | 2.474206  | -0.937668 | 0.836230  |
| C | 3.440307  | -1.868851 | 1.242532  |
| C | 3.566440  | -3.090734 | 0.575819  |
| C | 2.744910  | -3.349175 | -0.520215 |
| B | 0.320342  | -0.147553 | -0.552935 |
| C | -1.003706 | -0.845403 | -1.231959 |
| C | -1.569557 | -0.479643 | -2.489536 |
| C | -2.802172 | -0.996664 | -2.932097 |
| C | -3.485819 | -1.946670 | -2.173701 |
| C | -2.912594 | -2.408944 | -0.983387 |
| C | -1.690761 | -1.884720 | -0.541796 |
| N | -0.864846 | 0.340930  | -3.364404 |
| N | -4.752698 | -2.404868 | -2.574875 |
| N | -1.166570 | -2.394898 | 0.663290  |
| N | 2.437871  | 0.277593  | 1.546359  |
| N | 4.475691  | -4.061130 | 1.033518  |
| N | 1.108890  | -2.681919 | -2.121866 |
| C | 0.723173  | 1.359772  | -1.070185 |
| C | 2.014469  | 1.752760  | -1.531753 |
| C | 2.357808  | 3.105372  | -1.723380 |
| C | 1.418703  | 4.115282  | -1.523565 |
| C | 0.113055  | 3.765728  | -1.160285 |
| C | -0.220004 | 2.421330  | -0.955114 |
| N | 2.959154  | 0.800178  | -1.895958 |
| N | -1.555252 | 2.142089  | -0.584065 |
| N | 1.784548  | 5.467934  | -1.640428 |
| P | -1.111858 | 0.503471  | 2.148613  |
| C | -2.864729 | 0.062828  | 1.870124  |
| C | -3.915446 | 0.925803  | 2.585440  |
| C | -0.486044 | -0.479504 | 3.546300  |
| C | -1.194630 | -0.311521 | 4.897044  |
| C | -1.041144 | 2.259738  | 2.628135  |
| C | 0.385477  | 2.830699  | 2.632808  |
| H | -3.414011 | -3.179665 | -0.399067 |
| H | -3.203264 | -0.675726 | -3.892570 |
| H | 4.092450  | -1.634914 | 2.083233  |
| H | 2.867356  | -4.271621 | -1.086559 |
| H | -0.644330 | 4.538102  | -1.030432 |
| H | 3.361917  | 3.357380  | -2.062478 |

|   |           |           |           |
|---|-----------|-----------|-----------|
| H | -1.421701 | 0.851869  | -4.037765 |
| H | -0.122999 | 0.894114  | -2.939177 |
| H | -1.432018 | -3.360650 | 0.826934  |
| H | -0.154526 | -2.277162 | 0.729984  |
| H | -4.916347 | -2.342126 | -3.574058 |
| H | -4.984625 | -3.329883 | -2.229031 |
| H | -2.209920 | 2.822160  | -0.957596 |
| H | -1.836568 | 1.196224  | -0.843036 |
| H | 3.924228  | 1.103644  | -1.861072 |
| H | 2.808902  | -0.129489 | -1.510274 |
| H | 2.575864  | 5.628445  | -2.254599 |
| H | 1.013970  | 6.083357  | -1.878186 |
| H | 3.354833  | 0.568540  | 1.868654  |
| H | 1.976310  | 1.025528  | 1.036220  |
| H | 1.043803  | -3.661853 | -2.368461 |
| H | 0.236287  | -2.177563 | -2.252685 |
| H | 4.786124  | -4.704926 | 0.313522  |
| H | 5.267561  | -3.676069 | 1.537330  |
| H | -0.549339 | -1.514771 | 3.191383  |
| H | 0.581529  | -0.233397 | 3.604348  |
| H | -1.657254 | 2.797020  | 1.901604  |
| H | -1.516153 | 2.352604  | 3.613404  |
| H | -3.005336 | 0.100957  | 0.785451  |
| H | -2.952363 | -0.993739 | 2.143683  |
| H | -4.916157 | 0.538185  | 2.368122  |
| H | -3.786285 | 0.922074  | 3.672566  |
| H | -3.879013 | 1.964246  | 2.243654  |
| H | 0.372692  | 3.857759  | 3.011818  |
| H | 1.062150  | 2.240307  | 3.258557  |
| H | 0.782459  | 2.852446  | 1.614574  |
| H | -0.727472 | -0.957520 | 5.647545  |
| H | -1.133661 | 0.718119  | 5.264698  |
| H | -2.252293 | -0.588839 | 4.836651  |
| O | -0.203597 | 0.211017  | 0.976265  |

### 33. TPB NMR. R = OCH<sub>3</sub>

E<sub>elec</sub> = -2406.061766 a.u.; H = -2405.248803 a.u

|   |           |           |           |
|---|-----------|-----------|-----------|
| C | -1.423988 | 0.830631  | 1.826233  |
| C | -0.755240 | 1.202536  | 0.641372  |
| C | -0.869414 | 2.572571  | 0.339491  |
| C | -1.578503 | 3.486599  | 1.132406  |
| C | -2.222335 | 3.042848  | 2.283256  |
| C | -2.151860 | 1.700971  | 2.649739  |
| B | -0.092725 | -0.038201 | -0.231839 |
| P | 1.903279  | 1.204326  | -1.837543 |
| C | 2.592740  | 2.032246  | -0.356728 |
| C | 3.162617  | 3.451350  | -0.470241 |
| O | -0.226346 | 3.039657  | -0.808526 |
| C | -0.452507 | 4.394308  | -1.181375 |
| O | -2.901996 | 4.007835  | 2.998953  |
| C | -3.589597 | 3.581040  | 4.172659  |
| O | -1.298314 | -0.496995 | 2.149724  |
| C | -2.062339 | -1.028902 | 3.219989  |
| C | 1.153317  | -0.855060 | 0.476235  |
| C | 1.790245  | -0.538003 | 1.686193  |

|   |           |           |           |
|---|-----------|-----------|-----------|
| C | 2.806186  | -1.318705 | 2.273487  |
| C | 3.238111  | -2.461504 | 1.608111  |
| C | 2.691532  | -2.805589 | 0.369751  |
| C | 1.683570  | -2.001510 | -0.166221 |
| O | 1.405837  | 0.636479  | 2.296630  |
| C | 1.676832  | 0.819574  | 3.681095  |
| O | 1.147537  | -2.279881 | -1.401434 |
| C | 1.427156  | -3.541569 | -1.994687 |
| O | 4.218848  | -3.306972 | 2.079724  |
| C | 4.801690  | -2.989694 | 3.342616  |
| C | -1.367753 | -0.947123 | -0.753858 |
| C | -2.303592 | -0.370308 | -1.644516 |
| C | -3.445606 | -1.025840 | -2.117181 |
| C | -3.705219 | -2.321734 | -1.679397 |
| C | -2.844549 | -2.944661 | -0.779813 |
| C | -1.705331 | -2.246949 | -0.335542 |
| O | -2.031633 | 0.922558  | -2.037801 |
| C | -3.021506 | 1.630551  | -2.768527 |
| O | -4.847156 | -2.908332 | -2.188178 |
| C | -5.145384 | -4.233468 | -1.757970 |
| O | -0.860171 | -2.843706 | 0.576637  |
| C | -1.090322 | -4.189881 | 0.958231  |
| C | 3.167403  | -0.008704 | -2.347657 |
| C | 4.518601  | 0.564573  | -2.802169 |
| C | 1.545662  | 2.250114  | -3.297225 |
| C | 2.463600  | 3.405270  | -3.722701 |
| H | 3.065440  | -3.688591 | -0.134297 |
| H | 3.250104  | -1.019632 | 3.213555  |
| H | -4.138898 | -0.564999 | -2.810012 |
| H | -3.052187 | -3.942692 | -0.419308 |
| H | -1.654528 | 4.537956  | 0.887104  |
| H | -2.642635 | 1.335953  | 3.541851  |
| H | -2.629219 | 2.644271  | -2.880135 |
| H | -3.186637 | 1.194177  | -3.764500 |
| H | -3.976321 | 1.665463  | -2.225912 |
| H | -0.255759 | -4.448760 | 1.613862  |
| H | -2.037200 | -4.305100 | 1.507271  |
| H | -1.096851 | -4.867181 | 0.091464  |
| H | -6.068264 | -4.509953 | -2.271742 |
| H | -4.346015 | -4.934935 | -2.035726 |
| H | -5.303582 | -4.276575 | -0.671101 |
| H | -1.845972 | -2.098602 | 3.221697  |
| H | -1.766365 | -0.595206 | 4.187027  |
| H | -3.138436 | -0.870376 | 3.063558  |
| H | 0.069600  | 4.535179  | -2.130973 |
| H | -1.521850 | 4.598669  | -1.323258 |
| H | -0.046474 | 5.097714  | -0.440746 |
| H | -4.063681 | 4.476650  | 4.578804  |
| H | -4.358541 | 2.832688  | 3.936099  |
| H | -2.894628 | 3.164877  | 4.915675  |
| H | 1.097409  | 1.697839  | 3.973809  |
| H | 1.350079  | -0.050402 | 4.265955  |
| H | 2.744111  | 1.007177  | 3.870561  |
| H | 0.788117  | -3.594350 | -2.878227 |
| H | 2.481692  | -3.624886 | -2.297110 |

|   |          |           |           |
|---|----------|-----------|-----------|
| H | 1.181642 | -4.365382 | -1.311906 |
| H | 5.530002 | -3.779041 | 3.537329  |
| H | 5.312415 | -2.017080 | 3.314188  |
| H | 4.045868 | -2.980152 | 4.139805  |
| H | 1.466047 | 1.510257  | -4.105241 |
| H | 0.526357 | 2.597020  | -3.106958 |
| H | 1.775906 | 2.009422  | 0.370808  |
| H | 3.353850 | 1.339038  | 0.021494  |
| H | 3.298509 | -0.660179 | -1.476203 |
| H | 2.705992 | -0.622066 | -3.129460 |
| H | 3.546081 | 3.758988  | 0.508266  |
| H | 3.985886 | 3.520184  | -1.187928 |
| H | 2.387865 | 4.164578  | -0.760383 |
| H | 2.146481 | 3.775428  | -4.703540 |
| H | 2.411787 | 4.239898  | -3.020918 |
| H | 3.510926 | 3.104177  | -3.806415 |
| H | 5.234380 | -0.250224 | -2.951522 |
| H | 4.435659 | 1.108352  | -3.747734 |
| H | 4.944951 | 1.242281  | -2.054396 |
| O | 0.566647 | 0.506654  | -1.578545 |

#### 34. TPB NMR. R = OCOCH<sub>3</sub>

$E_{\text{elec}} = -2406.061766$  a.u.;  $H = -2405.248803$  a.u

|   |           |           |           |
|---|-----------|-----------|-----------|
| C | -1.835839 | 1.792348  | 1.074443  |
| C | -0.561210 | 1.537580  | 0.529435  |
| C | 0.130566  | 2.721929  | 0.230840  |
| C | -0.357898 | 4.012583  | 0.428924  |
| C | -1.648699 | 4.170899  | 0.912714  |
| C | -2.402175 | 3.050069  | 1.237320  |
| B | -0.054813 | -0.007189 | 0.243145  |
| P | -0.020876 | -1.962906 | 2.546346  |
| C | 1.656312  | -2.640168 | 2.365341  |
| C | 2.097773  | -3.694247 | 3.395135  |
| O | 1.475596  | 2.686212  | -0.196415 |
| C | 1.828903  | 2.574533  | -1.511834 |
| O | 3.011750  | 2.541748  | -1.776651 |
| O | -2.173119 | 5.430455  | 1.177189  |
| C | -2.592768 | 6.284011  | 0.151399  |
| O | -2.997621 | 7.369965  | 0.471317  |
| O | -2.654360 | 0.692101  | 1.391843  |
| C | -2.830853 | 0.325962  | 2.702696  |
| O | -3.435819 | -0.699577 | 2.928064  |
| C | 1.551853  | -0.166572 | -0.089809 |
| C | 2.117205  | -0.763570 | -1.228712 |
| C | 3.462859  | -1.114529 | -1.351285 |
| C | 4.333628  | -0.768226 | -0.330261 |
| C | 3.867915  | -0.101908 | 0.796999  |
| C | 2.512578  | 0.202821  | 0.877116  |
| O | 1.246110  | -1.111677 | -2.269808 |
| C | 1.439673  | -0.826082 | -3.606120 |
| O | 0.602969  | -1.249511 | -4.371449 |
| O | 2.027332  | 0.821385  | 2.030199  |
| C | 2.481872  | 2.028350  | 2.543625  |
| O | 1.896514  | 2.447281  | 3.513297  |
| O | 5.671626  | -1.146158 | -0.396564 |

|   |           |           |           |
|---|-----------|-----------|-----------|
| C | 6.612555  | -0.315500 | -1.014515 |
| O | 7.756386  | -0.683909 | -1.024848 |
| C | -1.114378 | -0.812212 | -0.764620 |
| C | -1.113176 | -2.219218 | -0.831316 |
| C | -2.177475 | -3.008329 | -1.259663 |
| C | -3.316168 | -2.374096 | -1.738373 |
| C | -3.330311 | -0.995591 | -1.868666 |
| C | -2.228809 | -0.260352 | -1.426834 |
| O | 0.010380  | -2.881186 | -0.315982 |
| C | 0.721803  | -3.832537 | -1.033267 |
| O | 1.600265  | -4.409059 | -0.433826 |
| O | -4.421740 | -3.122808 | -2.131292 |
| C | -5.405326 | -3.454604 | -1.191831 |
| O | -6.348923 | -4.090781 | -1.577609 |
| O | -2.313446 | 1.127133  | -1.600051 |
| C | -2.438619 | 1.687416  | -2.857107 |
| O | -2.688273 | 2.868970  | -2.913472 |
| C | 0.380228  | -4.080400 | -2.479750 |
| C | -5.172296 | -2.988062 | 0.225740  |
| C | -2.196574 | 0.810177  | -4.062703 |
| C | 3.655175  | 2.725887  | 1.900117  |
| C | 6.088059  | 0.963908  | -1.618415 |
| C | 2.630612  | -0.005649 | -4.037136 |
| C | 0.705451  | 2.472876  | -2.505545 |
| C | -2.258840 | 1.238420  | 3.762191  |
| C | -2.503743 | 5.753561  | -1.256560 |
| C | -1.370936 | -3.176230 | 2.299132  |
| C | -1.006267 | -4.666104 | 2.248074  |
| C | -0.183279 | -1.508553 | 4.297340  |
| C | 0.853175  | -0.530193 | 4.860645  |
| H | -3.415068 | 3.157692  | 1.609300  |
| H | 0.273092  | 4.868995  | 0.217586  |
| H | -2.136265 | -4.089603 | -1.192035 |
| H | -4.201229 | -0.490611 | -2.271911 |
| H | 4.551036  | 0.147042  | 1.600444  |
| H | 3.825130  | -1.666320 | -2.210160 |
| H | -1.461650 | 0.024384  | -3.875167 |
| H | -3.130947 | 0.325524  | -4.363041 |
| H | -1.871327 | 1.457351  | -4.878325 |
| H | -6.053703 | -3.235903 | 0.815792  |
| H | -4.295395 | -3.490178 | 0.647600  |
| H | -4.970983 | -1.914187 | 0.275312  |
| H | -0.321758 | -4.918756 | -2.543683 |
| H | -0.056174 | -3.213347 | -2.974556 |
| H | 1.303327  | -4.380975 | -2.978362 |
| H | 2.967784  | 0.701205  | -3.276978 |
| H | 3.459340  | -0.678889 | -4.281147 |
| H | 2.347433  | 0.516747  | -4.952257 |
| H | 3.738625  | 2.527215  | 0.832096  |
| H | 3.529113  | 3.794809  | 2.077075  |
| H | 4.574553  | 2.405219  | 2.403349  |
| H | 5.509514  | 1.545692  | -0.895717 |
| H | 6.935608  | 1.542609  | -1.983632 |
| H | 5.407209  | 0.742538  | -2.446245 |
| H | 0.213385  | 1.503843  | -2.367201 |

|   |           |           |           |
|---|-----------|-----------|-----------|
| H | -0.054497 | 3.239300  | -2.336074 |
| H | 1.106847  | 2.547767  | -3.514914 |
| H | -1.202288 | 1.446993  | 3.569104  |
| H | -2.781275 | 2.199235  | 3.760976  |
| H | -2.389720 | 0.765118  | 4.735013  |
| H | -2.882051 | 4.731868  | -1.343858 |
| H | -3.061340 | 6.426288  | -1.907718 |
| H | -1.457369 | 5.732685  | -1.579886 |
| H | -2.094401 | -2.971732 | 3.096067  |
| H | -1.858683 | -2.861895 | 1.373807  |
| H | -1.889276 | -5.242772 | 1.952933  |
| H | -0.212065 | -4.863211 | 1.523230  |
| H | -0.685618 | -5.039328 | 3.225070  |
| H | -1.204589 | -1.134212 | 4.417726  |
| H | -0.152124 | -2.470673 | 4.829459  |
| H | 0.643740  | -0.341272 | 5.918302  |
| H | 1.867378  | -0.935634 | 4.789028  |
| H | 0.840266  | 0.423535  | 4.331257  |
| H | 1.762094  | -3.026417 | 1.349734  |
| H | 2.296046  | -1.755189 | 2.444335  |
| H | 3.148329  | -3.939522 | 3.212240  |
| H | 2.015679  | -3.330525 | 4.423865  |
| H | 1.525748  | -4.619453 | 3.307590  |
| O | -0.254326 | -0.713820 | 1.667836  |

### 35. TPB NMR. R = OH

$E_{elec} = -2052.131057$  a.u.;  $H = -2051.582705$  a.u

|   |           |           |           |
|---|-----------|-----------|-----------|
| C | -0.033317 | -0.083804 | 2.805766  |
| C | 0.031235  | -0.617560 | 1.506087  |
| C | 0.533719  | -1.929325 | 1.464816  |
| C | 0.991748  | -2.649868 | 2.574575  |
| C | 0.923421  | -2.053167 | 3.828111  |
| C | 0.408844  | -0.765893 | 3.950449  |
| B | -0.489939 | 0.120065  | 0.133159  |
| P | 2.148846  | -0.206712 | -1.325098 |
| C | 2.138838  | -1.602868 | -2.501455 |
| C | 3.254605  | -1.691194 | -3.552558 |
| O | 0.604595  | -2.550888 | 0.220646  |
| O | 1.379725  | -2.779413 | 4.909958  |
| O | -0.592156 | 1.163007  | 2.969798  |
| C | -1.692418 | -0.724160 | -0.592469 |
| C | -2.676678 | -1.403419 | 0.147122  |
| C | -3.700369 | -2.173357 | -0.423419 |
| C | -3.786150 | -2.266952 | -1.809108 |
| C | -2.870663 | -1.585564 | -2.599965 |
| C | -1.868788 | -0.823725 | -1.983677 |
| O | -2.652995 | -1.264776 | 1.520274  |
| O | -1.016677 | -0.111094 | -2.824542 |
| O | -4.761106 | -3.010375 | -2.447604 |
| C | -0.722066 | 1.737170  | 0.232092  |
| C | 0.341503  | 2.594899  | 0.561050  |
| C | 0.260162  | 3.988159  | 0.627609  |
| C | -0.965994 | 4.593973  | 0.374729  |
| C | -2.069780 | 3.808815  | 0.060858  |
| C | -1.932751 | 2.411402  | -0.003498 |

|   |           |           |           |
|---|-----------|-----------|-----------|
| O | 1.574112  | 2.010081  | 0.851688  |
| O | -1.026865 | 5.971539  | 0.449194  |
| O | -3.055048 | 1.664152  | -0.284991 |
| C | 2.691212  | 1.299943  | -2.202541 |
| C | 4.200882  | 1.524454  | -2.375748 |
| C | 3.301844  | -0.536288 | 0.052031  |
| C | 4.539864  | -1.389052 | -0.261180 |
| H | -2.946220 | -1.646656 | -3.683728 |
| H | -4.429840 | -2.675930 | 0.213121  |
| H | 1.125421  | 4.599383  | 0.874677  |
| H | -3.038786 | 4.271610  | -0.130860 |
| H | 1.391594  | -3.656270 | 2.473945  |
| H | 0.335626  | -0.292828 | 4.930735  |
| H | 2.116897  | 2.691759  | 1.278272  |
| H | -1.934837 | 6.246258  | 0.245055  |
| H | -3.796976 | 2.274112  | -0.420963 |
| H | -0.608020 | 1.364834  | 3.918511  |
| H | 0.757615  | -3.496085 | 0.378180  |
| H | 1.264169  | -2.240250 | 5.708417  |
| H | -3.382981 | -1.785931 | 1.889103  |
| H | -1.404357 | -0.161724 | -3.712893 |
| H | -5.318523 | -3.422721 | -1.768935 |
| H | 2.080633  | -2.510127 | -1.891626 |
| H | 1.157596  | -1.489310 | -2.979193 |
| H | 2.170969  | 1.295626  | -3.168035 |
| H | 2.246099  | 2.105834  | -1.608671 |
| H | 3.578742  | 0.442019  | 0.456876  |
| H | 2.683214  | -1.015899 | 0.817555  |
| H | 5.122327  | -1.537710 | 0.653876  |
| H | 4.257926  | -2.377775 | -0.636320 |
| H | 5.195418  | -0.917858 | -0.999911 |
| H | 3.085489  | -2.561539 | -4.195327 |
| H | 3.269002  | -0.806136 | -4.196522 |
| H | 4.245300  | -1.800185 | -3.102260 |
| H | 4.377684  | 2.474879  | -2.889792 |
| H | 4.707774  | 1.574390  | -1.406769 |
| H | 4.675577  | 0.734840  | -2.964831 |
| O | 0.726297  | 0.013270  | -0.883054 |

### 36. $\text{H}_3\text{PO}_4$ NMR

$E_{\text{elec}} = -644.372730$  a.u.;  $H = -644.319634$  a.u

|   |           |           |           |
|---|-----------|-----------|-----------|
| P | -0.053721 | 0.149720  | 0.000000  |
| O | -0.545822 | 1.521184  | 0.000000  |
| O | 1.557429  | 0.070397  | -0.000000 |
| O | -0.545822 | -0.684257 | 1.290114  |
| O | -0.545822 | -0.684257 | -1.290114 |
| H | -0.251527 | -1.606650 | 1.349877  |
| H | -0.251527 | -1.606650 | -1.349877 |
| H | 1.949163  | -0.817039 | -0.000000 |

### 37. $\text{PO}(\text{CH}_2\text{CH}_3)_3$ NMR

$E_{\text{elec}} = -654.5192712$  a.u.;  $H = -654.305918$  a.u

|   |           |           |          |
|---|-----------|-----------|----------|
| O | 0.841651  | -0.959892 | 1.700354 |
| P | 0.142116  | -0.306739 | 0.549937 |
| C | -1.592141 | -0.894494 | 0.356625 |



|   |           |           |           |
|---|-----------|-----------|-----------|
| C | 0.962808  | -0.611853 | -1.061446 |
| C | 0.074633  | 1.516760  | 0.753034  |
| C | -2.239440 | -0.830501 | -1.037059 |
| H | -1.555978 | -1.931616 | 0.711796  |
| H | -2.189364 | -0.339115 | 1.091279  |
| H | 1.120926  | 1.828840  | 0.858831  |
| C | -0.637592 | 2.350372  | -0.322313 |
| H | -0.387631 | 1.671027  | 1.736217  |
| C | 2.446751  | -0.211644 | -1.035656 |
| H | 0.863581  | -1.688922 | -1.248131 |
| H | 0.423326  | -0.094282 | -1.864138 |
| H | -3.272442 | -1.192104 | -0.990417 |
| H | -2.262164 | 0.187152  | -1.437368 |
| H | -1.701532 | -1.459413 | -1.753115 |
| H | 2.946933  | -0.525229 | -1.957891 |
| H | 2.565483  | 0.873565  | -0.945047 |
| H | 2.953280  | -0.680338 | -0.187001 |
| H | -0.542357 | 3.418831  | -0.100480 |
| H | -0.210906 | 2.180754  | -1.316669 |
| H | -1.706225 | 2.119219  | -0.368858 |

## 2. TPP derivatives. Cartesian coordinates

### 38. TPP R = CF<sub>3</sub>

$E_{\text{elec}} = -4071.662342$  a.u.;  $H = -4071.308043$  a.u

|   |           |           |           |
|---|-----------|-----------|-----------|
| C | -1.462312 | -2.093486 | -0.859613 |
| C | -0.505082 | -1.700533 | 0.113004  |
| C | 0.023033  | -2.740534 | 0.933960  |
| C | -0.312644 | -4.075865 | 0.728225  |
| C | -1.223719 | -4.427342 | -0.257463 |
| C | -1.812198 | -3.435744 | -1.025058 |
| P | 0.004674  | 0.002081  | 0.654877  |
| C | 1.731638  | 0.414890  | 0.107474  |
| C | 2.372781  | 1.386320  | 0.932564  |
| C | 3.696969  | 1.761330  | 0.725502  |
| C | 4.453251  | 1.152383  | -0.266187 |
| C | 3.884302  | 0.154050  | -1.039008 |
| C | 2.546024  | -0.211899 | -0.872145 |
| C | -1.218468 | 1.294451  | 0.119771  |
| C | -2.374630 | 1.362549  | 0.953233  |
| C | -3.358686 | 2.327464  | 0.760714  |
| C | -3.211115 | 3.295823  | -0.222843 |
| C | -2.069058 | 3.301199  | -1.005699 |
| C | -1.085669 | 2.319880  | -0.852847 |
| H | -1.938836 | 4.074270  | -1.751769 |
| H | -4.231114 | 2.340498  | 1.401021  |
| H | 4.144332  | 2.522224  | 1.351763  |
| H | 4.480505  | -0.337259 | -1.797039 |
| H | 0.128703  | -4.843188 | 1.350728  |
| H | -2.540630 | -3.707542 | -1.778150 |
| C | -1.622960 | -5.871372 | -0.442131 |
| C | 0.931563  | -2.488907 | 2.139332  |
| C | -2.251477 | -1.147195 | -1.756836 |
| C | 2.116513  | -1.360603 | -1.777062 |
| C | 5.903152  | 1.530950  | -0.447941 |

|   |           |           |           |
|---|-----------|-----------|-----------|
| C | 1.705611  | 2.041736  | 2.143681  |
| C | 0.119589  | 2.526890  | -1.762414 |
| C | -4.299564 | 4.318373  | -0.442359 |
| C | -2.601619 | 0.451770  | 2.161589  |
| F | -4.890441 | 4.681158  | 0.724146  |
| F | -3.828869 | 5.445129  | -1.030716 |
| F | -5.280931 | 3.826828  | -1.247227 |
| F | -3.836474 | 0.631807  | 2.695973  |
| F | -2.520825 | -0.872585 | 1.860784  |
| F | -1.714574 | 0.703412  | 3.151716  |
| F | 1.131773  | 3.153804  | -1.094228 |
| F | 0.625063  | 1.393808  | -2.286611 |
| F | -0.182580 | 3.324955  | -2.818971 |
| F | 2.037123  | -1.755492 | 1.837696  |
| F | 1.394960  | -3.651593 | 2.664994  |
| F | 0.275053  | -1.852224 | 3.136406  |
| F | -2.008856 | -6.130534 | -1.715931 |
| F | -0.606518 | -6.716950 | -0.140855 |
| F | -2.668052 | -6.202148 | 0.365453  |
| F | -3.293152 | -0.587021 | -1.075421 |
| F | -2.802140 | -1.801244 | -2.811898 |
| F | -1.526622 | -0.140453 | -2.282064 |
| F | 1.484450  | 1.149977  | 3.136705  |
| F | 2.483931  | 3.020546  | 2.671935  |
| F | 0.517504  | 2.635828  | 1.849284  |
| F | 6.110740  | 2.849680  | -0.206657 |
| F | 6.343012  | 1.269105  | -1.703052 |
| F | 6.705113  | 0.840190  | 0.408442  |
| F | 2.160822  | -2.549471 | -1.107114 |
| F | 0.877788  | -1.234686 | -2.290981 |
| F | 2.949990  | -1.498460 | -2.840292 |

### 39. TPP R = CH<sub>3</sub>

$E_{\text{elec}} = -1390.771860$  a.u.;  $H = -1390.226779$  a.u

|   |           |           |           |
|---|-----------|-----------|-----------|
| P | 0.001406  | -0.001425 | 0.791276  |
| C | -1.277880 | -1.175717 | 0.202457  |
| C | -2.255384 | -0.939534 | -0.795749 |
| C | -1.332246 | -2.388982 | 0.942082  |
| C | -3.262726 | -1.890063 | -0.998948 |
| C | -2.346383 | -3.313305 | 0.685231  |
| C | -3.336141 | -3.078275 | -0.271376 |
| H | -4.004622 | -1.698590 | -1.773183 |
| H | -2.362870 | -4.241685 | 1.254407  |
| C | -0.378933 | 1.693236  | 0.203866  |
| C | -1.405822 | 2.343437  | 0.941868  |
| C | 0.314407  | 2.424461  | -0.792184 |
| C | -1.703192 | 3.682941  | 0.684651  |
| C | -0.009238 | 3.771014  | -0.995929 |
| C | -1.005566 | 4.425120  | -0.270510 |
| H | -2.501635 | 4.158536  | 1.252470  |
| H | 0.527476  | 4.319787  | -1.768778 |
| C | 1.658898  | -0.520016 | 0.203138  |
| C | 2.735608  | 0.046522  | 0.939287  |
| C | 1.945701  | -1.488545 | -0.790666 |
| C | 4.044420  | -0.365850 | 0.682885  |

|   |           |           |           |
|---|-----------|-----------|-----------|
| C | 3.273863  | -1.881652 | -0.993262 |
| C | 4.338497  | -1.343731 | -0.269465 |
| H | 4.855445  | 0.089701  | 1.249308  |
| H | 3.480910  | -2.622733 | -1.764268 |
| C | 2.508628  | 1.122255  | 1.975223  |
| H | 2.162418  | 2.056233  | 1.514504  |
| H | 1.732846  | 0.822114  | 2.690478  |
| H | 3.434026  | 1.334241  | 2.518984  |
| C | 5.755161  | -1.812277 | -0.496606 |
| H | 6.472874  | -0.999184 | -0.345329 |
| H | 6.016763  | -2.615224 | 0.205140  |
| H | 5.886856  | -2.205208 | -1.509877 |
| C | 0.900357  | -2.095398 | -1.696845 |
| H | 0.210801  | -1.337997 | -2.080785 |
| H | 1.385382  | -2.581744 | -2.548734 |
| H | 0.287294  | -2.844185 | -1.183769 |
| C | 1.361040  | 1.820908  | -1.698900 |
| H | 2.317773  | 1.668944  | -1.187563 |
| H | 1.051119  | 0.842518  | -2.077315 |
| H | 1.535922  | 2.480703  | -2.554236 |
| C | -1.308242 | 5.886096  | -0.498657 |
| H | -0.741686 | 6.514846  | 0.200846  |
| H | -1.036259 | 6.195277  | -1.512986 |
| H | -2.370778 | 6.101663  | -0.344929 |
| C | -2.221633 | 1.610475  | 1.980708  |
| H | -2.857588 | 0.842226  | 1.522762  |
| H | -1.572249 | 1.090800  | 2.695968  |
| H | -2.867523 | 2.306608  | 2.524049  |
| C | -0.292110 | -2.729984 | 1.983137  |
| H | 0.692524  | -2.895023 | 1.527463  |
| H | -0.169274 | -1.908791 | 2.700024  |
| H | -0.572739 | -3.638505 | 2.524266  |
| C | -4.452986 | -4.067581 | -0.499489 |
| H | -5.283015 | -3.884550 | 0.195595  |
| H | -4.852096 | -3.989942 | -1.515939 |
| H | -4.113147 | -5.096145 | -0.339294 |
| C | -2.250674 | 0.266505  | -1.705431 |
| H | -2.593945 | 1.173904  | -1.196951 |
| H | -1.247209 | 0.482011  | -2.083683 |
| H | -2.909444 | 0.088410  | -2.560877 |

#### 40. TPP R = CN

$E_{\text{elec}} = -1867.332737$  a.u.;  $H = -1867.046378$  a.u

|   |           |           |           |
|---|-----------|-----------|-----------|
| C | -0.433136 | -2.701147 | 0.937360  |
| C | -0.806226 | -1.499927 | 0.282522  |
| C | -1.831643 | -1.580832 | -0.685686 |
| C | -2.459324 | -2.801780 | -0.968703 |
| C | -2.068488 | -3.971554 | -0.308966 |
| C | -1.040613 | -3.922819 | 0.640580  |
| P | 0.000134  | 0.000061  | 0.965680  |
| C | -0.895821 | 1.448408  | 0.282771  |
| C | -2.123026 | 1.725257  | 0.937220  |
| C | -2.877671 | 2.861911  | 0.640414  |
| C | -2.405968 | 3.776902  | -0.308713 |
| C | -1.197045 | 3.531259  | -0.967900 |

|   |           |           |           |
|---|-----------|-----------|-----------|
| C | -0.453107 | 2.377456  | -0.684881 |
| C | 1.702368  | 0.051657  | 0.282609  |
| C | 2.556235  | 0.975165  | 0.937592  |
| C | 3.917940  | 1.059930  | 0.640694  |
| C | 4.473949  | 0.194336  | -0.309130 |
| C | 3.656221  | -0.728882 | -0.968932 |
| C | 2.285036  | -0.795787 | -0.685786 |
| H | -3.239637 | -2.837144 | -1.720811 |
| H | -0.718488 | -4.824672 | 1.148856  |
| H | -3.820057 | 3.033311  | 1.148329  |
| H | -0.837456 | 4.225106  | -1.719617 |
| H | 4.537987  | 1.789697  | 1.149052  |
| H | 4.076897  | -1.386838 | -1.721218 |
| C | 5.869639  | 0.259209  | -0.610038 |
| C | 2.003543  | 1.887088  | 1.893260  |
| C | 1.522923  | -1.717809 | -1.469327 |
| C | 0.727064  | 2.179465  | -1.467754 |
| C | -3.160417 | 4.952925  | -0.609505 |
| C | -2.636537 | 0.790050  | 1.892243  |
| C | -2.249168 | -0.459774 | -1.469127 |
| C | 0.633165  | -2.678416 | 1.892798  |
| C | -2.710225 | -5.212705 | -0.609670 |
| N | 1.554034  | 2.660250  | 2.636427  |
| N | 7.004670  | 0.311381  | -0.852019 |
| N | 0.959637  | -2.476220 | -2.146108 |
| N | 1.527670  | -2.675667 | 2.635759  |
| N | -3.232608 | -6.221777 | -0.851464 |
| N | -2.624364 | 0.407332  | -2.145785 |
| N | 1.666018  | 2.071653  | -2.143959 |
| N | -3.081470 | 0.013753  | 2.634896  |
| N | -3.773482 | 5.909597  | -0.851383 |

#### 41. TPP R = 5F

$E_{\text{elec}} = -2525.969597$  a.u.;  $H = -2525.792012$  a.u

|   |           |           |           |
|---|-----------|-----------|-----------|
| C | -0.459648 | -2.138976 | -0.634740 |
| C | 0.251870  | -1.560732 | 0.422287  |
| C | 1.281747  | -2.336957 | 0.971931  |
| C | 1.595673  | -3.612517 | 0.517071  |
| C | 0.852837  | -4.160620 | -0.527847 |
| C | -0.178086 | -3.421079 | -1.103406 |
| P | -0.019196 | 0.062197  | 1.271638  |
| C | -1.617112 | 0.671874  | 0.585921  |
| C | -2.752696 | -0.077744 | 0.919982  |
| C | -4.045595 | 0.315894  | 0.602944  |
| C | -4.241395 | 1.528365  | -0.058394 |
| C | -3.141567 | 2.316559  | -0.387167 |
| C | -1.855003 | 1.887786  | -0.062179 |
| F | -2.589742 | -1.255715 | 1.562664  |
| F | -5.477979 | 1.933447  | -0.369122 |
| F | -0.843113 | 2.713138  | -0.399892 |
| F | 2.024031  | -1.829964 | 1.979451  |
| F | 1.133740  | -5.387467 | -0.980445 |
| F | -1.448780 | -1.475069 | -1.259299 |
| C | 1.282948  | 1.054971  | 0.428471  |
| C | 1.516464  | 1.072324  | -0.951343 |

|   |           |           |           |
|---|-----------|-----------|-----------|
| C | 2.576286  | 1.769361  | -1.517864 |
| C | 3.442987  | 2.484669  | -0.689011 |
| C | 3.240039  | 2.496376  | 0.689307  |
| C | 2.169000  | 1.785605  | 1.228221  |
| F | 0.682668  | 0.420092  | -1.781683 |
| F | 2.007209  | 1.825149  | 2.562215  |
| F | 4.465393  | 3.161914  | -1.220459 |
| F | -3.324866 | 3.487540  | -1.015762 |
| F | -5.096633 | -0.451432 | 0.925415  |
| F | 4.072755  | 3.186451  | 1.481574  |
| F | 2.768721  | 1.773688  | -2.845195 |
| F | 2.596954  | -4.312983 | 1.069555  |
| F | -0.884196 | -3.942556 | -2.117869 |

#### 42. TPP R = F

$E_{\text{elec}} = -1930.325552$  a.u.;  $H = -1930.105606$  a.u

|   |           |           |           |
|---|-----------|-----------|-----------|
| C | -1.469521 | -1.172305 | -1.030401 |
| C | -1.208167 | -1.126071 | 0.345514  |
| C | -2.057177 | -1.913875 | 1.133505  |
| C | -3.094425 | -2.687929 | 0.626984  |
| C | -3.281614 | -2.664808 | -0.747647 |
| C | -2.485157 | -1.917603 | -1.608185 |
| P | 0.039979  | -0.058364 | 1.172215  |
| C | 1.662488  | -0.559224 | 0.464805  |
| C | 2.766580  | 0.248492  | 0.775070  |
| C | 4.081915  | -0.038795 | 0.452723  |
| C | 4.311212  | -1.237260 | -0.211608 |
| C | 3.288968  | -2.114963 | -0.539411 |
| C | 1.993648  | -1.752903 | -0.187329 |
| C | -0.351414 | 1.546119  | 0.341549  |
| C | -1.426421 | 2.261429  | 0.890731  |
| C | -1.851916 | 3.510304  | 0.464840  |
| C | -1.142980 | 4.084011  | -0.582491 |
| C | -0.069124 | 3.453075  | -1.193374 |
| C | 0.291699  | 2.197197  | -0.719552 |
| H | 0.466144  | 3.909960  | -2.016797 |
| H | -2.695048 | 4.007153  | 0.928543  |
| H | 4.886012  | 0.640059  | 0.708294  |
| H | 3.482973  | -3.050472 | -1.049657 |
| H | -3.724229 | -3.280169 | 1.279169  |
| H | -2.641496 | -1.924028 | -2.679914 |
| F | -1.519546 | 5.303896  | -1.029587 |
| F | 1.325231  | 1.595259  | -1.348702 |
| F | -2.117227 | 1.682460  | 1.905324  |
| F | 2.521628  | 1.412853  | 1.430641  |
| F | 5.581266  | -1.562333 | -0.546060 |
| F | 1.018000  | -2.639436 | -0.503059 |
| F | -0.673710 | -0.461574 | -1.859663 |
| F | -1.868631 | -1.938527 | 2.471392  |
| F | -4.280969 | -3.405531 | -1.276641 |

#### 43. TPP R = H

$E_{\text{elec}} = -1036.733729$  a.u.;  $H = -1036.447906$  a.u

|   |          |           |           |
|---|----------|-----------|-----------|
| C | 2.431734 | -1.319462 | -0.984596 |
| C | 1.620707 | -0.311987 | -0.436277 |

|   |           |           |           |
|---|-----------|-----------|-----------|
| C | 2.087578  | 0.395582  | 0.680771  |
| C | 3.331836  | 0.097076  | 1.238864  |
| C | 4.121992  | -0.916712 | 0.695817  |
| C | 3.667084  | -1.627261 | -0.417369 |
| P | 0.000582  | -0.000621 | -1.257588 |
| C | -0.539481 | 1.558149  | -0.436213 |
| C | -0.071987 | 2.764049  | -0.984519 |
| C | -0.422660 | 3.988007  | -0.417437 |
| C | -1.265487 | 4.027129  | 0.695675  |
| C | -1.748916 | 2.836107  | 1.238701  |
| C | -1.385925 | 1.609115  | 0.680618  |
| C | -1.079965 | -1.247598 | -0.436793 |
| C | -2.360403 | -1.439506 | -0.981829 |
| C | -3.246508 | -2.353916 | -0.415033 |
| C | -2.858076 | -3.108488 | 0.694326  |
| C | -1.582515 | -2.938066 | 1.233767  |
| C | -0.699934 | -2.011255 | 0.676202  |
| H | 3.681412  | 0.655938  | 2.103326  |
| H | 4.279571  | -2.414026 | -0.850108 |
| H | -0.047079 | 4.911621  | -0.850187 |
| H | -2.407756 | 2.859701  | 2.103112  |
| H | -4.236015 | -2.485512 | -0.845099 |
| H | -1.272797 | -3.524506 | 2.095156  |
| H | -3.543947 | -3.829468 | 1.131051  |
| H | -2.662029 | -0.864213 | -1.854643 |
| H | 0.288253  | -1.880538 | 1.108087  |
| H | -1.761303 | 0.687014  | 1.115199  |
| H | -1.548434 | 4.981086  | 1.132558  |
| H | 0.573193  | 2.739004  | -1.860223 |
| H | 1.476255  | 1.181462  | 1.115198  |
| H | 5.089674  | -1.148297 | 1.132762  |
| H | 2.087842  | -1.865728 | -1.860417 |

#### 44. TPP R = NH<sub>2</sub>

E<sub>elec</sub> = -1535.243030 a.u.; H = -1534.798086 a.u

|   |           |           |           |
|---|-----------|-----------|-----------|
| C | -4.259390 | -1.537641 | -0.414353 |
| C | -3.750061 | -1.736306 | 0.874992  |
| C | -2.467444 | -1.285962 | 1.201730  |
| C | -1.629036 | -0.658582 | 0.224704  |
| C | -2.186975 | -0.436194 | -1.073579 |
| C | -3.485925 | -0.881819 | -1.373678 |
| P | -0.020765 | -0.074748 | 0.858677  |
| C | 1.392160  | -1.089759 | 0.275185  |
| C | 2.650183  | -0.764013 | 0.867974  |
| C | 3.785935  | -1.552065 | 0.645127  |
| C | 3.702440  | -2.707486 | -0.138144 |
| C | 2.481675  | -3.052481 | -0.723050 |
| C | 1.339090  | -2.259158 | -0.535611 |
| C | 0.245993  | 1.623866  | 0.232401  |
| C | 0.959909  | 2.000599  | -0.934902 |
| C | 1.135550  | 3.344724  | -1.278953 |
| C | 0.574641  | 4.355633  | -0.489435 |
| C | -0.136555 | 4.015091  | 0.664615  |
| C | -0.291806 | 2.673358  | 1.036671  |
| H | 1.682733  | 3.600735  | -2.184752 |

|   |           |           |           |
|---|-----------|-----------|-----------|
| H | -0.566046 | 4.796522  | 1.288877  |
| H | 4.732244  | -1.268379 | 1.102567  |
| H | 2.408827  | -3.946207 | -1.340600 |
| H | -4.360077 | -2.221732 | 1.634147  |
| H | -3.886808 | -0.715499 | -2.372116 |
| N | -5.516760 | -2.046983 | -0.753932 |
| H | -6.151313 | -2.169086 | 0.026745  |
| H | -5.967104 | -1.582837 | -1.534202 |
| N | -1.488256 | 0.223783  | -2.052902 |
| H | -0.475250 | 0.327799  | -1.994258 |
| H | -1.831810 | 0.112003  | -2.996824 |
| N | -2.044619 | -1.411760 | 2.522326  |
| H | -2.456009 | -2.171494 | 3.048893  |
| H | -1.049535 | -1.271398 | 2.677739  |
| N | 2.754108  | 0.334050  | 1.717824  |
| N | 4.818017  | -3.543150 | -0.286328 |
| N | 0.183015  | -2.607477 | -1.223866 |
| H | 3.700754  | 0.632912  | 1.916630  |
| H | 2.127525  | 1.113109  | 1.533409  |
| H | 4.811208  | -4.110201 | -1.126631 |
| H | 5.710860  | -3.080211 | -0.159944 |
| H | 0.136210  | -3.575964 | -1.515111 |
| H | -0.689358 | -2.266112 | -0.826744 |
| N | 1.417989  | 1.014564  | -1.821340 |
| N | 0.675842  | 5.694274  | -0.884689 |
| N | -0.938476 | 2.389165  | 2.231466  |
| H | 2.071062  | 1.356114  | -2.517478 |
| H | 1.744226  | 0.157864  | -1.370327 |
| H | 0.589753  | 6.367751  | -0.132248 |
| H | 1.466166  | 5.902122  | -1.483897 |
| H | -1.611152 | 3.073020  | 2.551032  |
| H | -1.213956 | 1.424293  | 2.384864  |

#### 45. TPP R = NO<sub>2</sub>

E<sub>elec</sub> = -2878.319118 a.u.; H = -2877.995214 a.u

|   |           |           |           |
|---|-----------|-----------|-----------|
| C | 0.892796  | 2.301301  | -0.621289 |
| C | -0.051566 | 1.727186  | 0.254719  |
| C | -0.907211 | 2.686176  | 0.851448  |
| C | -0.885572 | 4.047409  | 0.570907  |
| C | 0.053049  | 4.509987  | -0.330080 |
| C | 0.971676  | 3.653609  | -0.917115 |
| P | -0.000155 | -0.000222 | 0.973218  |
| C | -1.470047 | -0.908578 | 0.254265  |
| C | -1.873094 | -2.128862 | 0.851154  |
| C | -3.062965 | -2.790447 | 0.570650  |
| C | -3.932736 | -2.208706 | -0.330341 |
| C | -3.649975 | -0.985178 | -0.917642 |
| C | -2.439183 | -0.377721 | -0.621957 |
| C | 1.521816  | -0.819004 | 0.254812  |
| C | 2.780103  | -0.557757 | 0.851720  |
| C | 3.948144  | -1.257037 | 0.570881  |
| C | 3.879455  | -2.300885 | -0.330472 |
| C | 2.678499  | -2.668034 | -0.917627 |
| C | 1.546868  | -1.923571 | -0.621590 |
| H | 2.631675  | -3.510167 | -1.598382 |

|   |           |           |           |
|---|-----------|-----------|-----------|
| H | 4.879015  | -0.988902 | 1.054524  |
| H | -3.296370 | -3.730588 | 1.054384  |
| H | -4.355905 | -0.523421 | -1.598274 |
| H | -1.583386 | 4.719423  | 1.054431  |
| H | 1.724530  | 4.034294  | -1.597636 |
| N | 0.093391  | 5.958130  | -0.664884 |
| N | -1.897827 | 2.279105  | 1.870914  |
| N | 1.923787  | 1.499681  | -1.340654 |
| N | -2.259590 | 0.915340  | -1.342157 |
| N | -5.207354 | -2.897421 | -0.664763 |
| N | -1.025585 | -2.783109 | 1.870938  |
| N | 0.337056  | -2.415089 | -1.341019 |
| N | 5.113428  | -3.059799 | -0.665456 |
| N | 2.922854  | 0.503220  | 1.871634  |
| O | 0.957332  | 6.320849  | -1.463121 |
| O | -0.737553 | 6.681208  | -0.118333 |
| O | -2.433104 | 3.143206  | 2.554287  |
| O | -2.107334 | 1.059546  | 1.980348  |
| O | 3.095856  | 1.754057  | -1.053538 |
| O | 1.542235  | 0.690740  | -2.176325 |
| O | -3.065389 | 1.803962  | -1.055925 |
| O | -1.368045 | 0.988040  | -2.177738 |
| O | -5.953383 | -2.330502 | -1.463006 |
| O | -5.418392 | -3.978379 | -0.117936 |
| O | -1.506551 | -3.678456 | 2.554470  |
| O | 0.135359  | -2.354866 | 1.980536  |
| O | -0.027661 | -3.558150 | -1.055930 |
| O | -0.174133 | -1.678652 | -2.174519 |
| O | 3.938891  | 0.534522  | 2.554932  |
| O | 1.971322  | 1.294228  | 1.981578  |
| O | 6.155073  | -2.701929 | -0.118709 |
| O | 4.995640  | -3.989056 | -1.464050 |

#### 46. TPP R = OCH<sub>3</sub>

$E_{\text{elec}} = -2068.028114$  a.u.;  $H = -2067.432836$  a.u

|   |           |           |           |
|---|-----------|-----------|-----------|
| C | 1.109268  | 1.467479  | -0.921909 |
| C | 0.958797  | 1.306585  | 0.465026  |
| C | 1.719150  | 2.161404  | 1.289369  |
| C | 2.600047  | 3.110138  | 0.762078  |
| C | 2.727629  | 3.219563  | -0.623902 |
| C | 1.985867  | 2.407395  | -1.484388 |
| P | -0.042828 | -0.021383 | 1.259056  |
| C | -1.787358 | 0.215452  | 0.716047  |
| C | -2.673964 | -0.833439 | 1.049910  |
| C | -4.038502 | -0.794518 | 0.774851  |
| C | -4.565735 | 0.350468  | 0.172126  |
| C | -3.748235 | 1.438447  | -0.128351 |
| C | -2.373545 | 1.363568  | 0.161225  |
| C | 0.607830  | -1.470640 | 0.298921  |
| C | 1.883555  | -1.896980 | 0.714920  |
| C | 2.533177  | -3.022155 | 0.187628  |
| C | 1.876178  | -3.759187 | -0.797858 |
| C | 0.616071  | -3.373611 | -1.256391 |
| C | 0.002573  | -2.235986 | -0.721976 |
| H | 0.152097  | -3.963022 | -2.037646 |



|   |           |           |           |
|---|-----------|-----------|-----------|
| H | 3.516386  | -3.304234 | 0.538153  |
| H | -4.704986 | -1.613788 | 1.014344  |
| H | -4.161791 | 2.338197  | -0.562583 |
| H | 3.189768  | 3.768505  | 1.387471  |
| H | 2.076093  | 2.503027  | -2.557914 |
| O | 3.616693  | 4.174454  | -1.056091 |
| O | 1.539153  | 2.008305  | 2.637179  |
| O | 0.322947  | 0.662346  | -1.691220 |
| O | -1.544115 | 2.427929  | -0.072844 |
| O | -5.918829 | 0.315564  | -0.076035 |
| O | -2.071588 | -1.909002 | 1.646852  |
| O | -1.209307 | -1.803848 | -1.181152 |
| O | 2.400728  | -4.883807 | -1.391154 |
| O | 2.462345  | -1.111873 | 1.679101  |
| C | 2.327197  | 2.806009  | 3.517758  |
| H | 2.036643  | 2.497031  | 4.523218  |
| H | 3.400386  | 2.623244  | 3.369450  |
| H | 2.117675  | 3.876168  | 3.386183  |
| C | 3.790245  | 4.326468  | -2.465458 |
| H | 4.531829  | 5.118051  | -2.584841 |
| H | 4.162466  | 3.400139  | -2.923119 |
| H | 2.852078  | 4.624651  | -2.952815 |
| C | 0.484200  | 0.682591  | -3.104913 |
| H | -0.206502 | -0.073834 | -3.480381 |
| H | 0.220322  | 1.663184  | -3.525388 |
| H | 1.510885  | 0.421226  | -3.394042 |
| C | -2.860060 | -3.062051 | 1.929520  |
| H | -2.167774 | -3.787489 | 2.359298  |
| H | -3.655642 | -2.834994 | 2.651542  |
| H | -3.302853 | -3.470854 | 1.011481  |
| C | -2.037528 | 3.540697  | -0.810002 |
| H | -1.174729 | 4.194866  | -0.948740 |
| H | -2.427511 | 3.229714  | -1.789091 |
| H | -2.820114 | 4.078886  | -0.257194 |
| C | -6.506317 | 1.469022  | -0.677487 |
| H | -7.566233 | 1.233977  | -0.788579 |
| H | -6.390648 | 2.354520  | -0.037808 |
| H | -6.068195 | 1.671164  | -1.664487 |
| C | 3.754510  | -1.455794 | 2.168919  |
| H | 3.987220  | -0.698331 | 2.919204  |
| H | 3.754990  | -2.449830 | 2.636551  |
| H | 4.505706  | -1.423629 | 1.368080  |
| C | -1.933115 | -2.627159 | -2.089724 |
| H | -2.893491 | -2.126067 | -2.223187 |
| H | -1.418963 | -2.710181 | -3.057707 |
| H | -2.094056 | -3.632871 | -1.678548 |
| C | 3.689365  | -5.316658 | -0.954570 |
| H | 3.911433  | -6.211097 | -1.539025 |
| H | 4.453616  | -4.551589 | -1.147852 |
| H | 3.684286  | -5.567186 | 0.114851  |

#### 47. TPP R = OCOCH<sub>3</sub>

E<sub>elec</sub> = -3088.765565 a.u.; H = -3088.074599 a.u

|   |          |           |           |
|---|----------|-----------|-----------|
| C | 2.282186 | -0.987919 | -0.614792 |
| C | 1.724238 | -0.345114 | 0.501554  |

|   |           |           |           |
|---|-----------|-----------|-----------|
| C | 2.632233  | 0.083119  | 1.490959  |
| C | 4.003976  | -0.090326 | 1.387519  |
| C | 4.501632  | -0.768680 | 0.277246  |
| C | 3.649586  | -1.242637 | -0.715026 |
| P | -0.032857 | -0.220154 | 0.997629  |
| C | -1.032045 | -1.312121 | -0.084823 |
| C | -1.028430 | -2.663130 | 0.313806  |
| C | -2.000378 | -3.575127 | -0.071094 |
| C | -3.025849 | -3.129010 | -0.901122 |
| C | -3.033042 | -1.829105 | -1.394511 |
| C | -2.023297 | -0.948898 | -1.012457 |
| O | -0.038958 | -3.031196 | 1.222913  |
| C | 1.023800  | -3.875050 | 0.881946  |
| C | 0.990856  | -4.528165 | -0.475371 |
| O | -4.036725 | -4.001702 | -1.276124 |
| C | -5.190024 | -4.131708 | -0.478748 |
| C | -5.241772 | -3.284919 | 0.767614  |
| O | -2.042528 | 0.364678  | -1.464144 |
| C | -2.121078 | 0.729832  | -2.800224 |
| C | -2.014190 | -0.337589 | -3.859102 |
| O | 2.113381  | 0.796283  | 2.565142  |
| C | 1.749509  | 0.148478  | 3.763342  |
| C | 2.132777  | -1.298577 | 3.887561  |
| O | 5.858370  | -1.046669 | 0.202336  |
| C | 6.735522  | -0.202911 | -0.499190 |
| C | 6.118739  | 1.005498  | -1.154030 |
| O | 1.409718  | -1.471567 | -1.583736 |
| C | 1.597153  | -1.350139 | -2.953726 |
| C | 2.631630  | -0.382684 | -3.473691 |
| C | -0.602004 | 1.501218  | 0.726337  |
| C | 0.158093  | 2.629876  | 0.382589  |
| C | -0.360873 | 3.922061  | 0.420074  |
| C | -1.696183 | 4.107316  | 0.760265  |
| C | -2.493652 | 3.025199  | 1.125495  |
| C | -1.930497 | 1.758320  | 1.125900  |
| O | 1.505507  | 2.474024  | 0.052693  |
| C | 1.952829  | 2.586586  | -1.246780 |
| C | 0.949940  | 2.961792  | -2.307238 |
| O | -2.746103 | 0.666309  | 1.411623  |
| C | -2.903697 | 0.171939  | 2.718697  |
| C | -2.251183 | 0.964594  | 3.816349  |
| O | -2.227494 | 5.389321  | 0.794485  |
| C | -2.808746 | 5.949730  | -0.353959 |
| C | -2.795448 | 5.095990  | -1.597448 |
| O | -2.234227 | 1.911583  | -3.025966 |
| O | -6.031059 | -4.900814 | -0.854354 |
| O | 1.881169  | -4.024720 | 1.712618  |
| O | 0.870413  | -2.012033 | -3.653669 |
| O | 1.173553  | 0.813751  | 4.581580  |
| O | 7.894664  | -0.513047 | -0.524195 |
| O | -3.558263 | -0.829079 | 2.838715  |
| O | 3.125967  | 2.374774  | -1.448061 |
| O | -3.261881 | 7.057179  | -0.258966 |
| H | -3.534245 | 3.165730  | 1.396484  |
| H | 0.268838  | 4.771756  | 0.179729  |

|   |           |           |           |
|---|-----------|-----------|-----------|
| H | -1.989469 | -4.594555 | 0.297170  |
| H | -3.838600 | -1.504283 | -2.042527 |
| H | 4.669971  | 0.281358  | 2.158040  |
| H | 4.052743  | -1.810443 | -1.545565 |
| H | -1.407349 | -1.188980 | -3.547873 |
| H | -3.015673 | -0.700050 | -4.113474 |
| H | -1.590753 | 0.128344  | -4.750002 |
| H | -6.199229 | -3.456717 | 1.257635  |
| H | -4.424440 | -3.541401 | 1.448663  |
| H | -5.122217 | -2.222858 | 0.533810  |
| H | 0.285913  | -5.366156 | -0.460575 |
| H | 0.672356  | -3.833811 | -1.255686 |
| H | 1.989156  | -4.912809 | -0.684198 |
| H | 2.903987  | 0.394556  | -2.758892 |
| H | 3.534280  | -0.939426 | -3.746989 |
| H | 2.229794  | 0.055945  | -4.389355 |
| H | 1.662246  | -1.895447 | 3.099328  |
| H | 3.214951  | -1.423832 | 3.783131  |
| H | 1.808660  | -1.656326 | 4.864110  |
| H | 5.516581  | 1.585848  | -0.449954 |
| H | 6.919241  | 1.616992  | -1.568654 |
| H | 5.438368  | 0.697750  | -1.954301 |
| H | -0.019158 | 2.482071  | -2.158268 |
| H | 0.783013  | 4.044108  | -2.278237 |
| H | 1.367142  | 2.704812  | -3.280880 |
| H | -1.174198 | 1.057170  | 3.644830  |
| H | -2.667835 | 1.976661  | 3.850760  |
| H | -2.429211 | 0.456792  | 4.763251  |
| H | -3.255585 | 4.119460  | -1.422867 |
| H | -3.327270 | 5.628899  | -2.384550 |
| H | -1.767024 | 4.898131  | -1.915155 |

#### 48. TPP R = OH

$E_{\text{elec}} = -1714.091850$  a.u.;  $H = -1713.761233$  a.u

|   |           |           |           |
|---|-----------|-----------|-----------|
| C | 1.889111  | -1.843484 | -0.342490 |
| C | 1.639409  | -0.681197 | 0.405035  |
| C | 2.784185  | 0.019414  | 0.839937  |
| C | 4.088547  | -0.365140 | 0.535241  |
| C | 4.283679  | -1.517028 | -0.222161 |
| C | 3.190407  | -2.261124 | -0.659121 |
| P | 0.041698  | -0.077457 | 1.090034  |
| C | -0.247817 | 1.573488  | 0.312763  |
| C | -1.303730 | 2.315012  | 0.882302  |
| C | -1.616931 | 3.622953  | 0.509335  |
| C | -0.845813 | 4.239532  | -0.471403 |
| C | 0.202027  | 3.549273  | -1.077157 |
| C | 0.481667  | 2.229587  | -0.694154 |
| C | -1.294097 | -1.065666 | 0.305648  |
| C | -2.059171 | -1.906400 | 1.132430  |
| C | -3.176995 | -2.607675 | 0.663118  |
| C | -3.550727 | -2.470544 | -0.673088 |
| C | -2.814743 | -1.662496 | -1.535860 |
| C | -1.698960 | -0.983846 | -1.041024 |
| H | -3.111239 | -1.580422 | -2.578425 |
| H | -3.743050 | -3.252993 | 1.334200  |

|   |           |           |           |
|---|-----------|-----------|-----------|
| H | -2.444854 | 4.159365  | 0.965060  |
| H | 0.795046  | 4.023385  | -1.859626 |
| H | 4.944008  | 0.212286  | 0.875428  |
| H | 3.339332  | -3.168716 | -1.244281 |
| O | 5.583048  | -1.873324 | -0.506706 |
| O | 2.547048  | 1.147742  | 1.586314  |
| O | 0.824160  | -2.598686 | -0.767557 |
| O | 1.487345  | 1.549988  | -1.328687 |
| O | -1.172630 | 5.532944  | -0.811366 |
| O | -2.051580 | 1.672856  | 1.839726  |
| O | -0.937227 | -0.217906 | -1.877372 |
| O | -4.639428 | -3.123532 | -1.202314 |
| O | -1.664427 | -2.041140 | 2.439248  |
| H | 3.395467  | 1.514590  | 1.880919  |
| H | 5.572081  | -2.690037 | -1.030690 |
| H | 1.168772  | -3.360867 | -1.258801 |
| H | -2.301780 | -2.612363 | 2.896690  |
| H | -1.342202 | -0.225576 | -2.759076 |
| H | -5.061096 | -3.643585 | -0.499695 |
| H | 1.923967  | 2.157452  | -1.946287 |
| H | -2.710132 | 2.294317  | 2.188655  |
| H | -0.560564 | 5.835542  | -1.500968 |

#### 49. TPP R = SO<sub>3</sub>H

$E_{\text{elec}} = -6652.876225$  a.u.;  $H = -6652.424997$  a.u

|   |           |           |           |
|---|-----------|-----------|-----------|
| C | -1.309048 | 2.071045  | 1.327963  |
| C | -0.111429 | 1.615718  | 0.706497  |
| C | 0.592933  | 2.599326  | -0.042438 |
| C | -0.008134 | 3.800738  | -0.406069 |
| C | -1.328783 | 4.038695  | -0.046355 |
| C | -1.949685 | 3.233245  | 0.892852  |
| P | 0.145832  | -0.195730 | 0.983501  |
| O | -0.888302 | 1.181983  | 3.777391  |
| S | -2.004681 | 1.431349  | 2.899528  |
| O | -2.722515 | 0.061543  | 2.543553  |
| S | 2.319334  | 2.433069  | -0.527168 |
| O | 2.626728  | 3.812601  | -1.290867 |
| S | -2.239890 | 5.325444  | -0.885178 |
| O | -3.547309 | 5.399265  | -0.284052 |
| C | 1.740135  | -0.793850 | 0.249442  |
| C | 2.871306  | -0.509801 | 1.063390  |
| C | 4.183884  | -0.667335 | 0.622542  |
| C | 4.401446  | -1.164026 | -0.651633 |
| C | 3.339202  | -1.647947 | -1.405169 |
| C | 2.029910  | -1.517261 | -0.944277 |
| S | 2.766140  | -0.060256 | 2.819707  |
| O | 1.885853  | -1.007300 | 3.482663  |
| S | 0.822709  | -2.474889 | -1.904853 |
| O | 0.130379  | -1.656838 | -2.869602 |
| S | 6.060546  | -1.279622 | -1.299789 |
| O | 6.187842  | 0.114770  | -2.114410 |
| C | -1.274768 | -1.020661 | 0.132449  |
| C | -2.075697 | -0.572350 | -0.939697 |
| C | -3.287026 | -1.190602 | -1.272075 |
| C | -3.680759 | -2.329319 | -0.591456 |

|   |           |           |           |
|---|-----------|-----------|-----------|
| C | -2.897387 | -2.851063 | 0.433353  |
| C | -1.732531 | -2.189142 | 0.800785  |
| S | -1.672650 | 0.747389  | -2.103018 |
| O | -2.676525 | 1.782418  | -1.981301 |
| S | -5.208800 | -3.142230 | -1.043245 |
| O | -5.674764 | -3.893915 | 0.097386  |
| S | -1.005274 | -2.922742 | 2.300620  |
| O | -1.393752 | -2.054507 | 3.409454  |
| O | -1.996176 | 0.028685  | -3.493582 |
| O | -0.267008 | 1.057276  | -2.063523 |
| O | -6.016944 | -2.193080 | -1.755442 |
| O | -4.688704 | -4.199346 | -2.159475 |
| O | 0.563380  | -2.875478 | 2.139271  |
| O | -1.391672 | -4.305902 | 2.308772  |
| O | 1.772515  | -3.402157 | -2.818726 |
| O | 0.113880  | -3.342841 | -0.997600 |
| O | 6.981739  | -1.240408 | -0.189821 |
| O | 6.070789  | -2.308224 | -2.303326 |
| O | 4.113189  | 0.095692  | 3.299654  |
| O | 2.004650  | 1.328106  | 2.844857  |
| O | -1.401818 | 6.480519  | -1.066372 |
| O | -2.330405 | 4.657778  | -2.348585 |
| O | 3.100259  | 2.533191  | 0.696482  |
| O | 2.559040  | 1.357086  | -1.453985 |
| O | -3.040750 | 2.368002  | 3.248065  |
| H | 3.545262  | -2.135831 | -2.349170 |
| H | 5.011465  | -0.416369 | 1.276046  |
| H | -3.903583 | -0.799222 | -2.074145 |
| H | -3.207301 | -3.743944 | 0.964436  |
| H | 0.516386  | 4.530998  | -1.007748 |
| H | -2.918650 | 3.502000  | 1.298366  |
| H | 0.967988  | -2.142100 | 2.709828  |
| H | -4.556063 | -5.061709 | -1.720196 |
| H | -1.277289 | -0.634556 | -3.635689 |
| H | 2.496941  | 1.962898  | 2.252354  |
| H | 6.580470  | 0.781936  | -1.518280 |
| H | 1.984759  | -4.215880 | -2.319301 |
| H | -2.212536 | -0.698959 | 2.969261  |
| H | 2.522459  | 3.656887  | -2.251220 |
| H | -2.746961 | 3.765768  | -2.288349 |

#### 50. H<sup>+</sup>

$E_{\text{elec}} = 0.000000$  a.u.;  $H = 5/2$  RT a.u

|   |           |           |          |
|---|-----------|-----------|----------|
| H | 0.000000. | 0.000000. | 0.000000 |
|---|-----------|-----------|----------|

#### 51. TPP protonated. R = CF<sub>3</sub>

$E_{\text{elec}} = -4072.018895$  a.u.;  $H = -4071.653958$  a.u

|   |           |           |           |
|---|-----------|-----------|-----------|
| C | 0.971227  | -2.402525 | -0.888964 |
| C | 1.151096  | -1.405370 | 0.099001  |
| C | 2.269925  | -1.530522 | 0.968744  |
| C | 3.187723  | -2.564149 | 0.798548  |
| C | 3.016986  | -3.502670 | -0.209597 |
| C | 1.903228  | -3.431812 | -1.031682 |
| P | -0.006712 | -0.003132 | 0.434827  |
| C | -1.797345 | -0.303899 | 0.083045  |

|   |           |           |           |
|---|-----------|-----------|-----------|
| C | -2.473120 | -1.211892 | 0.944948  |
| C | -3.825193 | -1.490910 | 0.760420  |
| C | -4.542547 | -0.873397 | -0.254425 |
| C | -3.916900 | 0.057448  | -1.068961 |
| C | -2.561225 | 0.350319  | -0.912693 |
| C | -1.835634 | -1.889341 | 2.156748  |
| F | -0.645962 | -2.481675 | 1.851042  |
| C | -6.022445 | -1.171943 | -0.423429 |
| F | -6.754076 | -0.391893 | 0.407853  |
| C | -2.058139 | 1.474976  | -1.812567 |
| F | -2.857071 | 1.664057  | -2.875595 |
| C | 2.528914  | -0.631440 | 2.176327  |
| F | 1.609970  | -0.860428 | 3.152080  |
| C | 4.058216  | -4.589835 | -0.413909 |
| F | 5.066293  | -4.126899 | -1.191221 |
| C | -0.251172 | -2.538787 | -1.791698 |
| F | -0.011496 | -3.336122 | -2.845750 |
| C | 0.631721  | 1.697485  | 0.087138  |
| C | 1.590117  | 2.030820  | -0.899911 |
| C | 2.014744  | 3.351099  | -1.053702 |
| C | 1.513036  | 4.359405  | -0.245001 |
| C | 0.611040  | 4.047786  | 0.762095  |
| C | 0.175108  | 2.737149  | 0.943704  |
| C | 2.323211  | 1.031459  | -1.789796 |
| F | 1.517317  | 0.062580  | -2.282831 |
| C | -0.742071 | 2.524230  | 2.146835  |
| F | -0.092016 | 1.850116  | 3.132958  |
| C | 1.998569  | 5.788772  | -0.415329 |
| F | 3.078871  | 6.011842  | 0.370833  |
| F | 2.357081  | 6.035311  | -1.693164 |
| F | 1.040995  | 6.673955  | -0.064868 |
| F | -1.848098 | 1.792238  | 1.829886  |
| F | -1.175717 | 3.679111  | 2.667703  |
| F | 3.309411  | 0.413455  | -1.082110 |
| F | 2.903869  | 1.628361  | -2.843676 |
| F | -2.024826 | 2.647329  | -1.119605 |
| F | -0.811609 | 1.258594  | -2.292313 |
| F | -6.294280 | -2.461357 | -0.127006 |
| F | -6.431816 | -0.931770 | -1.686714 |
| F | -1.583947 | -0.981227 | 3.137108  |
| F | -2.620262 | -2.839664 | 2.680654  |
| F | -1.285661 | -3.088667 | -1.096729 |
| F | -0.685136 | -1.356011 | -2.285504 |
| F | 4.590523  | -4.981173 | 0.764258  |
| F | 3.529100  | -5.673050 | -1.020265 |
| F | 3.740777  | -0.831137 | 2.709845  |
| F | 2.448450  | 0.692680  | 1.859987  |
| H | 1.748340  | -4.187560 | -1.791791 |
| H | 4.035437  | -2.640714 | 1.468461  |
| H | -4.318438 | -2.197633 | 1.416618  |
| H | -4.483881 | 0.561271  | -1.842107 |
| H | 0.239380  | 4.828922  | 1.413922  |
| H | 2.741956  | 3.589534  | -1.820196 |
| H | -0.012673 | 0.001436  | 1.825656  |

**52. TPP protonated. R = CH<sub>3</sub>****E<sub>elec</sub>** = -1391.186183 a.u.; **H** = -1390.629015 a.u

|   |           |           |           |
|---|-----------|-----------|-----------|
| C | -3.432212 | 2.975447  | -0.250372 |
| C | -3.501770 | 2.009738  | 0.758629  |
| C | -2.465630 | 1.106728  | 0.992706  |
| C | -1.308772 | 1.177371  | 0.171052  |
| C | -1.212948 | 2.136338  | -0.866213 |
| C | -2.283824 | 3.013610  | -1.046683 |
| P | 0.001964  | 0.002665  | 0.555482  |
| C | -0.363303 | -1.718336 | 0.167683  |
| C | 0.273698  | -2.687150 | 0.988781  |
| C | 0.003528  | -4.034908 | 0.755886  |
| C | -0.871523 | -4.454502 | -0.251116 |
| C | -1.474790 | -3.477096 | -1.047751 |
| C | -1.244055 | -2.111866 | -0.868622 |
| C | 1.232414  | -2.320022 | 2.098807  |
| C | -1.940314 | -1.147630 | -1.800394 |
| C | -1.166781 | -5.916554 | -0.459499 |
| C | -2.622109 | 0.094227  | 2.104779  |
| C | -0.029679 | 2.261930  | -1.797016 |
| C | -4.555931 | 3.955729  | -0.461375 |
| C | 1.674468  | 0.547583  | 0.165064  |
| C | 2.453550  | -0.016646 | -0.873889 |
| C | 3.752416  | 0.463333  | -1.051843 |
| C | 4.300212  | 1.470310  | -0.251845 |
| C | 3.500980  | 2.017503  | 0.756801  |
| C | 2.197815  | 1.579914  | 0.988808  |
| C | 1.962925  | -1.096045 | -1.810212 |
| C | 1.402346  | 2.224219  | 2.101532  |
| C | 5.715276  | 1.942578  | -0.458940 |
| H | 4.353591  | 0.039672  | -1.853144 |
| H | 3.900590  | 2.814911  | 1.379402  |
| H | 0.496870  | -4.778938 | 1.377283  |
| H | -2.143993 | -3.786612 | -1.847373 |
| H | -4.392366 | 1.951893  | 1.380402  |
| H | -2.220478 | 3.747199  | -1.847168 |
| H | -2.401754 | -0.926783 | 1.772361  |
| H | -1.958888 | 0.320938  | 2.950324  |
| H | -3.645889 | 0.107044  | 2.484847  |
| H | -5.525216 | 3.507377  | -0.224859 |
| H | -4.426501 | 4.824665  | 0.196335  |
| H | -4.579158 | 4.321457  | -1.491506 |
| H | 0.289452  | 1.296235  | -2.201013 |
| H | -0.288902 | 2.905180  | -2.641097 |
| H | 0.837050  | 2.700418  | -1.291309 |
| H | -2.753593 | -0.614490 | -1.296907 |
| H | -1.260331 | -0.389979 | -2.201865 |
| H | -2.366835 | -1.692260 | -2.645912 |
| H | -1.985242 | -6.233346 | 0.199397  |
| H | -1.473884 | -6.119445 | -1.489053 |
| H | -0.297075 | -6.536256 | -0.222718 |
| H | 2.006192  | -1.618759 | 1.765735  |
| H | 0.707871  | -1.860286 | 2.947268  |
| H | 1.733114  | -3.214703 | 2.475122  |
| H | 0.401316  | 2.529875  | 1.776401  |

|   |          |           |           |
|---|----------|-----------|-----------|
| H | 1.283556 | 1.542935  | 2.954940  |
| H | 1.919224 | 3.113789  | 2.468121  |
| H | 6.398119 | 1.384641  | 0.194364  |
| H | 6.042282 | 1.785016  | -1.490326 |
| H | 5.821091 | 3.003370  | -0.214078 |
| H | 1.907497 | -2.069775 | -1.312364 |
| H | 0.966152 | -0.881891 | -2.208196 |
| H | 2.645592 | -1.189326 | -2.657991 |
| H | 0.005176 | 0.001423  | 1.953796  |

### 53. TPP protonated. R = CN

$E_{\text{elec}} = -1867.659396$  a.u.;  $H = -1867.362656$  a.u

|   |           |           |           |
|---|-----------|-----------|-----------|
| C | 2.367484  | 0.660660  | -0.779310 |
| C | 1.434642  | 0.998894  | 0.223939  |
| C | 1.627449  | 2.185976  | 0.971609  |
| C | 2.731297  | 3.008363  | 0.735440  |
| C | 3.655900  | 2.655287  | -0.258025 |
| C | 3.471581  | 1.488634  | -1.013634 |
| P | -0.000141 | 0.000150  | 0.679143  |
| C | -1.582738 | 0.743133  | 0.224364  |
| C | -2.707311 | 0.315071  | 0.971021  |
| C | -3.971652 | 0.859355  | 0.734886  |
| C | -4.128318 | 1.837728  | -0.257490 |
| C | -3.025662 | 2.263123  | -1.011875 |
| C | -1.756341 | 1.721412  | -0.777560 |
| C | -2.528449 | -0.715457 | 1.944694  |
| N | -2.294703 | -1.576558 | 2.690708  |
| C | -5.417914 | 2.398548  | -0.506210 |
| N | -6.466837 | 2.855201  | -0.707020 |
| C | -0.672053 | 2.164523  | -1.595186 |
| N | 0.205793  | 2.528536  | -2.263210 |
| C | 0.646269  | 2.546135  | 1.946083  |
| N | -0.215849 | 2.774367  | 2.692636  |
| C | 4.786713  | 3.491243  | -0.506805 |
| N | 5.706926  | 4.170902  | -0.707716 |
| C | 2.207095  | -0.498638 | -1.598351 |
| N | 2.081223  | -1.439810 | -2.267482 |
| C | 0.147744  | -1.741931 | 0.224381  |
| C | 1.081976  | -2.501245 | 0.970119  |
| C | 1.243132  | -3.868312 | 0.734032  |
| C | 0.473219  | -4.493690 | -0.257235 |
| C | -0.447700 | -3.752004 | -1.010754 |
| C | -0.613479 | -2.381899 | -0.776625 |
| C | 1.886083  | -1.830608 | 1.942577  |
| N | 2.515930  | -1.197510 | 2.687659  |
| C | -1.540419 | -1.664846 | -1.593455 |
| N | -2.295220 | -1.086509 | -2.260679 |
| C | 0.632614  | -5.890916 | -0.505824 |
| N | 0.761827  | -7.027622 | -0.706571 |
| H | -1.031358 | -4.235408 | -1.786502 |
| H | 1.963165  | -4.436724 | 1.312472  |
| H | -4.823784 | 0.521126  | 1.314203  |
| H | -3.152474 | 3.009464  | -1.788416 |
| H | 2.865408  | 3.914835  | 1.315487  |
| H | 4.180441  | 1.225808  | -1.791168 |



H 0.000111 0.000439 2.079683

**54. TPP protonated. R = 5F**

$E_{\text{elec}} = -2526.317889$  a.u.;  $H = -2526.128893$  a.u

|   |           |           |           |
|---|-----------|-----------|-----------|
| C | -0.922083 | -2.557658 | -1.176510 |
| C | -0.210455 | -1.706956 | -0.313059 |
| C | 0.319937  | -2.250927 | 0.867299  |
| C | 0.164071  | -3.597893 | 1.172355  |
| C | -0.541540 | -4.424058 | 0.288718  |
| C | -1.089456 | -3.906927 | -0.891827 |
| P | 0.000775  | 0.000433  | -0.785006 |
| C | -1.372688 | 1.036438  | -0.314150 |
| C | -1.762123 | 2.070273  | -1.183022 |
| C | -2.848987 | 2.887246  | -0.898555 |
| C | -3.563997 | 2.676550  | 0.287063  |
| C | -3.192424 | 1.660295  | 1.176237  |
| C | -2.102013 | 0.854327  | 0.871275  |
| F | -1.066661 | 2.274482  | -2.313545 |
| F | -3.207892 | 3.858092  | -1.732118 |
| F | -4.598605 | 3.449589  | 0.573061  |
| F | -3.875272 | 1.478396  | 2.302191  |
| F | -1.742583 | -0.103202 | 1.736133  |
| F | 0.981180  | -1.465439 | 1.727166  |
| F | 0.671034  | -4.101490 | 2.293313  |
| F | -0.696942 | -5.706143 | 0.574963  |
| F | -1.760965 | -4.699744 | -1.720456 |
| F | -1.452772 | -2.054531 | -2.302988 |
| C | 1.585103  | 0.671927  | -0.315513 |
| C | 1.791268  | 1.406580  | 0.862590  |
| C | 3.035865  | 1.945899  | 1.165574  |
| C | 4.103723  | 1.745781  | 0.281865  |
| C | 3.929334  | 1.009605  | -0.896735 |
| C | 2.677088  | 0.478768  | -1.179036 |
| F | 0.780355  | 1.589092  | 1.721973  |
| F | 2.505800  | -0.235538 | -2.303346 |
| F | 4.951094  | 0.822733  | -1.725757 |
| F | 5.291735  | 2.253377  | 0.566051  |
| F | 3.218803  | 2.640179  | 2.284349  |
| H | -0.000136 | -0.000784 | -2.181244 |

**55. TPP protonated. R = F**

$E_{\text{elec}} = -1930.698276$  a.u.;  $H = -1930.466839$  a.u

|   |           |          |           |
|---|-----------|----------|-----------|
| C | -1.332455 | 1.866493 | -0.927434 |
| C | -1.324036 | 1.096642 | 0.248772  |
| C | -2.434370 | 1.241479 | 1.101139  |
| C | -3.484709 | 2.098673 | 0.838984  |
| C | -3.413066 | 2.835022 | -0.343116 |
| C | -2.354061 | 2.740658 | -1.245330 |
| P | -0.000075 | 0.000054 | 0.715143  |
| C | 1.611458  | 0.598651 | 0.248649  |
| C | 2.293336  | 1.485992 | 1.101810  |
| C | 3.560997  | 1.966540 | 0.839395  |
| C | 4.161703  | 1.537587 | -0.343777 |
| C | 3.549133  | 0.669455 | -1.246823 |
| C | 2.281091  | 0.222429 | -0.928786 |

|   |           |           |           |
|---|-----------|-----------|-----------|
| F | 1.663518  | 1.878935  | 2.228436  |
| F | 5.386163  | 1.986176  | -0.629727 |
| F | 1.651756  | -0.604257 | -1.783038 |
| F | -2.460560 | 0.497570  | 2.226438  |
| F | -4.414253 | 3.670630  | -0.628956 |
| F | -0.300832 | 1.736893  | -1.780683 |
| C | -0.287471 | -1.694743 | 0.248174  |
| C | -0.948868 | -2.086846 | -0.928711 |
| C | -1.195472 | -3.408603 | -1.246544 |
| C | -0.748821 | -4.372984 | -0.343897 |
| C | -0.075909 | -4.067050 | 0.838631  |
| C | 0.141468  | -2.728882 | 1.100817  |
| F | -1.351346 | -1.128789 | -1.782660 |
| F | 0.798190  | -2.379717 | 2.226536  |
| F | -0.972451 | -5.657767 | -0.629632 |
| H | -2.335066 | 3.321423  | -2.159718 |
| H | -4.324429 | 2.190747  | 1.517317  |
| H | 4.061631  | 2.646262  | 1.518439  |
| H | 4.041709  | 0.363608  | -2.162014 |
| H | 0.263447  | -4.840347 | 1.517305  |
| H | -1.707329 | -3.682419 | -2.161301 |
| H | -0.000217 | -0.000228 | 2.110687  |

# 56. TPP protonated. R = H

$E_{\text{elec}} = -1037.125751$  a.u.;  $H = -1036.828452$  a.u

|   |           |           |           |
|---|-----------|-----------|-----------|
| C | 2.220005  | 0.559773  | 0.723849  |
| C | 1.699386  | -0.218429 | -0.320920 |
| C | 2.486151  | -1.203383 | -0.942910 |
| C | 3.794653  | -1.402670 | -0.513930 |
| C | 4.314726  | -0.629635 | 0.528549  |
| C | 3.531427  | 0.347069  | 1.145457  |
| P | 0.001544  | -0.000240 | -0.843150 |
| C | -1.037334 | -1.361086 | -0.321745 |
| C | -2.281909 | -1.551658 | -0.946773 |
| C | -3.109956 | -2.584162 | -0.517479 |
| C | -2.704011 | -3.417856 | 0.528856  |
| C | -1.468254 | -3.226044 | 1.148892  |
| C | -0.626980 | -2.198125 | 0.726681  |
| C | -0.659194 | 1.579192  | -0.321805 |
| C | -0.196697 | 2.754089  | -0.939537 |
| C | -0.680560 | 3.986130  | -0.510681 |
| C | -1.614685 | 4.048119  | 0.527784  |
| C | -2.071593 | 2.880204  | 1.140580  |
| C | -1.598110 | 1.639019  | 0.718942  |
| H | -2.799802 | 2.933459  | 1.943828  |
| H | -0.332647 | 4.897042  | -0.987686 |
| H | -4.069458 | -2.741154 | -1.000252 |
| H | -1.155788 | -3.878492 | 1.958222  |
| H | 4.409998  | -2.156988 | -0.994227 |
| H | 3.941092  | 0.947160  | 1.951944  |
| H | 5.337382  | -0.788084 | 0.857521  |
| H | 2.082100  | -1.807354 | -1.751560 |
| H | 1.609851  | 1.324887  | 1.194920  |
| H | 0.339121  | -2.051005 | 1.200769  |
| H | -3.353651 | -4.223208 | 0.858266  |

|   |           |           |           |
|---|-----------|-----------|-----------|
| H | -2.600588 | -0.902057 | -1.758180 |
| H | -1.957674 | 0.727157  | 1.186878  |
| H | -1.990267 | 5.012361  | 0.856903  |
| H | 0.532413  | 2.707467  | -1.744591 |
| H | 0.002366  | -0.000878 | -2.248377 |

# 57. TPP protonated. R = NH<sub>2</sub>

E<sub>elec</sub> = -1535.678005 a.u.; H = -1535.220818 a.u

|   |           |           |           |
|---|-----------|-----------|-----------|
| C | -0.253339 | 2.650644  | 1.068289  |
| C | 0.236763  | 1.669661  | 0.153867  |
| C | 0.950773  | 2.108094  | -0.998096 |
| C | 1.267642  | 3.450958  | -1.156399 |
| C | 0.862324  | 4.399667  | -0.196838 |
| C | 0.084962  | 3.990689  | 0.901080  |
| P | -0.019808 | -0.042806 | 0.534240  |
| C | 1.362986  | -1.076884 | 0.110300  |
| C | 2.551974  | -0.903760 | 0.894572  |
| C | 3.613534  | -1.793107 | 0.774019  |
| C | 3.543009  | -2.865084 | -0.134820 |
| C | 2.407112  | -3.016424 | -0.948954 |
| C | 1.326787  | -2.140776 | -0.849090 |
| N | 2.602309  | 0.125901  | 1.824924  |
| N | 4.568875  | -3.772043 | -0.209600 |
| N | 0.271041  | -2.264831 | -1.738960 |
| N | 1.228294  | 1.192888  | -2.020568 |
| N | 1.238622  | 5.712707  | -0.327434 |
| N | -1.024866 | 2.249023  | 2.155435  |
| C | -1.610819 | -0.681310 | 0.086898  |
| C | -2.174977 | -1.674642 | 0.953438  |
| C | -3.518879 | -2.009202 | 0.861061  |
| C | -4.334796 | -1.397001 | -0.112558 |
| C | -3.776347 | -0.485884 | -1.023241 |
| C | -2.426672 | -0.129928 | -0.956541 |
| N | -5.651566 | -1.764107 | -0.225974 |
| N | -1.366703 | -2.244273 | 1.933212  |
| N | -1.916279 | 0.764626  | -1.865497 |
| H | 1.827706  | 3.771963  | -2.031338 |
| H | -0.291075 | 4.730543  | 1.603535  |
| H | 4.508898  | -1.646040 | 1.372918  |
| H | 2.366198  | -3.828048 | -1.671439 |
| H | -3.932248 | -2.774133 | 1.513466  |
| H | -4.395832 | -0.067643 | -1.812977 |
| H | -6.090717 | -2.257879 | 0.537726  |
| H | -6.270649 | -1.203220 | -0.793570 |
| H | -0.920947 | 0.784754  | -2.079901 |
| H | -2.512070 | 1.011567  | -2.643839 |
| H | -1.797262 | -2.983261 | 2.476226  |
| H | -0.415364 | -2.475057 | 1.661749  |
| H | 3.488407  | 0.241983  | 2.301514  |
| H | 2.186251  | 1.012680  | 1.553192  |
| H | 4.620302  | -4.391275 | -1.005998 |
| H | 5.453833  | -3.548218 | 0.222807  |
| H | 0.220519  | -3.147905 | -2.232445 |
| H | -0.635365 | -1.930598 | -1.422078 |
| H | 1.845667  | 1.547882  | -2.743470 |

|   |           |           |           |
|---|-----------|-----------|-----------|
| H | 1.520493  | 0.267675  | -1.706820 |
| H | 0.775519  | 6.411200  | 0.236873  |
| H | 1.573842  | 6.037730  | -1.223439 |
| H | -1.383305 | 3.004178  | 2.728192  |
| H | -1.739554 | 1.553559  | 1.964811  |
| H | -0.026458 | -0.053842 | 1.940025  |

# 58. TPP protonated. R = NO<sub>2</sub>

E<sub>elec</sub> = -2878.650305 a.u.; H = -2878.315689 a.u

|   |           |           |           |
|---|-----------|-----------|-----------|
| C | 0.028778  | -2.517436 | -0.624769 |
| C | 0.687493  | -1.633033 | 0.248249  |
| C | 1.853735  | -2.162736 | 0.843738  |
| C | 2.351112  | -3.432429 | 0.575494  |
| C | 1.649551  | -4.230840 | -0.307484 |
| C | 0.475010  | -3.801833 | -0.903482 |
| P | -0.002109 | 0.001106  | 0.793475  |
| C | -1.761685 | 0.222702  | 0.247329  |
| C | -2.804587 | -0.521735 | 0.841779  |
| C | -4.152581 | -0.316282 | 0.573285  |
| C | -4.491922 | 0.691332  | -0.309237 |
| C | -3.532013 | 1.493214  | -0.904614 |
| C | -2.196942 | 1.236062  | -0.625632 |
| N | -2.504090 | -1.601057 | 1.812027  |
| O | -1.292114 | -1.835729 | 2.001547  |
| N | -5.938017 | 0.933314  | -0.620646 |
| O | -6.745741 | 0.206872  | -0.052965 |
| N | -1.246303 | 2.142800  | -1.323270 |
| O | -0.449276 | 1.628555  | -2.099993 |
| N | 2.637507  | -1.362216 | 1.814256  |
| O | 2.234123  | -0.195586 | 2.004049  |
| N | 2.164731  | -5.603694 | -0.618450 |
| O | 1.504017  | -6.264119 | -1.413247 |
| N | -1.233077 | -2.149259 | -1.320967 |
| O | -1.191722 | -1.193772 | -2.088103 |
| C | 1.070645  | 1.412137  | 0.245164  |
| C | 2.163330  | 1.280753  | -0.630689 |
| C | 3.056300  | 2.306235  | -0.909138 |
| C | 2.847203  | 3.537705  | -0.310300 |
| C | 1.806936  | 3.749305  | 0.574287  |
| C | 0.952082  | 2.686849  | 0.842005  |
| N | 2.468086  | 0.004676  | -1.331739 |
| O | 1.619184  | -0.427185 | -2.103664 |
| N | -0.131845 | 2.968045  | 1.813005  |
| O | -0.944474 | 2.038342  | 2.000380  |
| N | 3.783424  | 4.666500  | -0.620304 |
| O | 3.563187  | 5.728458  | -0.049230 |
| O | 4.684081  | 4.421528  | -1.416063 |
| O | -0.179124 | 4.051719  | 2.356175  |
| O | 3.558711  | -0.501162 | -1.074804 |
| O | -1.352844 | 3.338480  | -1.058282 |
| O | -6.178309 | 1.836719  | -1.414709 |
| O | -3.417825 | -2.187744 | 2.352872  |
| O | -2.211228 | -2.847839 | -1.063433 |
| O | 3.197278  | -5.939099 | -0.049469 |
| O | 3.603161  | -1.859562 | 2.354490  |

|   |           |           |           |
|---|-----------|-----------|-----------|
| H | -0.076537 | -4.454063 | -1.572563 |
| H | 3.261824  | -3.782034 | 1.049184  |
| H | -4.911403 | -0.929745 | 1.046425  |
| H | -3.820134 | 2.297338  | -1.573707 |
| H | 1.658739  | 4.712820  | 1.049343  |
| H | 3.894869  | 2.152469  | -1.580296 |
| H | -0.001989 | 0.002012  | 2.171765  |

# 59. TPP protonated. R = OCH<sub>3</sub>

E<sub>elec</sub> = -2068.476993 a.u.; H = -2067.868633 a.u

|   |           |           |           |
|---|-----------|-----------|-----------|
| C | -1.391192 | 1.779745  | -1.043859 |
| C | -1.409726 | 1.010771  | 0.144139  |
| C | -2.588511 | 1.004528  | 0.918038  |
| C | -3.702927 | 1.767271  | 0.561482  |
| C | -3.636841 | 2.537837  | -0.606706 |
| C | -2.490289 | 2.545094  | -1.414808 |
| P | -0.014843 | 0.066961  | 0.728143  |
| C | 1.567757  | 0.791843  | 0.346819  |
| C | 2.019241  | 1.864121  | 1.154664  |
| C | 3.267089  | 2.440393  | 0.958662  |
| C | 4.083745  | 1.953117  | -0.072443 |
| C | 3.660823  | 0.913037  | -0.910475 |
| C | 2.399731  | 0.347784  | -0.700101 |
| O | 1.137595  | 2.272773  | 2.109759  |
| C | 1.529543  | 3.342261  | 2.989349  |
| O | 5.284555  | 2.571904  | -0.189116 |
| C | 6.186093  | 2.133895  | -1.220073 |
| O | 1.889713  | -0.637256 | -1.481458 |
| C | 2.701747  | -1.185459 | -2.528457 |
| O | -2.554193 | 0.198643  | 2.017004  |
| C | -3.700191 | 0.163107  | 2.884736  |
| O | -4.654099 | 3.315167  | -1.053402 |
| C | -5.866675 | 3.369498  | -0.281929 |
| O | -0.251921 | 1.699560  | -1.775426 |
| C | -0.138878 | 2.497966  | -2.962498 |
| C | -0.121436 | -1.678811 | 0.385253  |
| C | -0.750097 | -2.211570 | -0.757659 |
| C | -0.861356 | -3.592497 | -0.944579 |
| C | -0.314976 | -4.450601 | 0.018849  |
| C | 0.345180  | -3.953209 | 1.152136  |
| C | 0.443097  | -2.578520 | 1.322206  |
| O | -1.214834 | -1.302535 | -1.650972 |
| C | -1.922510 | -1.762726 | -2.810228 |
| O | 1.081023  | -1.988661 | 2.371544  |
| C | 1.660181  | -2.833312 | 3.382652  |
| O | -0.365138 | -5.803206 | -0.063713 |
| C | -1.026184 | -6.398650 | -1.193228 |
| H | -2.498555 | 3.148840  | -2.313243 |
| H | -4.596857 | 1.753152  | 1.168680  |
| H | 3.633509  | 3.257304  | 1.566845  |
| H | 4.292987  | 0.556834  | -1.711527 |
| H | 0.764899  | -4.658662 | 1.857609  |
| H | -1.354162 | -3.987575 | -1.821680 |
| H | 2.096255  | -2.148930 | 4.109967  |
| H | 0.890450  | -3.449716 | 3.860223  |

|   |           |           |           |
|---|-----------|-----------|-----------|
| H | 2.441297  | -3.469425 | 2.951890  |
| H | -0.947153 | -7.473927 | -1.035940 |
| H | -2.081656 | -6.103841 | -1.226899 |
| H | -0.525318 | -6.122113 | -2.128703 |
| H | -2.221096 | -0.856344 | -3.337166 |
| H | -1.271362 | -2.369279 | -3.451153 |
| H | -2.811937 | -2.336664 | -2.525399 |
| H | 0.683027  | 3.483494  | 3.660947  |
| H | 2.421876  | 3.065820  | 3.561897  |
| H | 1.713632  | 4.260411  | 2.420677  |
| H | 2.092739  | -1.970878 | -2.976441 |
| H | 2.938344  | -0.423164 | -3.280535 |
| H | 3.625113  | -1.616677 | -2.124693 |
| H | 7.070284  | 2.761260  | -1.111389 |
| H | 6.457030  | 1.080914  | -1.079087 |
| H | 5.744785  | 2.282357  | -2.212858 |
| H | -3.429898 | -0.525004 | 3.685370  |
| H | -3.905857 | 1.156812  | 3.298639  |
| H | -4.578658 | -0.215127 | 2.349758  |
| H | 0.859864  | 2.291865  | -3.347833 |
| H | -0.893354 | 2.206046  | -3.702578 |
| H | -0.235599 | 3.564038  | -2.727806 |
| H | -6.519578 | 4.052662  | -0.824328 |
| H | -6.333763 | 2.379436  | -0.219664 |
| H | -5.671191 | 3.760698  | 0.723404  |
| H | -0.103694 | 0.148379  | 2.115460  |

# **60. TPP protonated. R = OCOCH<sub>3</sub>**

**E<sub>elec</sub>** = -3089.144666 a.u.; **H** = -3088.443524 a.u

|   |           |           |           |
|---|-----------|-----------|-----------|
| C | -1.885735 | 1.654825  | 1.266346  |
| C | -0.578193 | 1.444707  | 0.786341  |
| C | 0.192111  | 2.570057  | 0.445535  |
| C | -0.322783 | 3.853019  | 0.578081  |
| C | -1.644790 | 4.018921  | 1.002295  |
| C | -2.435024 | 2.923278  | 1.359910  |
| P | -0.032433 | -0.262511 | 0.724135  |
| C | -1.102869 | -1.323480 | -0.246076 |
| C | -1.202901 | -2.650741 | 0.207583  |
| C | -2.213946 | -3.496471 | -0.215638 |
| C | -3.153564 | -2.993548 | -1.120604 |
| C | -3.047038 | -1.701961 | -1.645941 |
| C | -2.008777 | -0.878862 | -1.227400 |
| O | -0.287854 | -3.041995 | 1.177368  |
| C | 0.873559  | -3.786278 | 0.850879  |
| O | 1.714844  | -3.858838 | 1.701461  |
| O | -4.179549 | -3.785873 | -1.563362 |
| C | -5.309786 | -4.084247 | -0.737435 |
| O | -6.098615 | -4.864612 | -1.174364 |
| O | -1.859489 | 0.431546  | -1.619429 |
| C | -2.026319 | 0.971476  | -2.908947 |
| O | -1.886617 | 2.164996  | -2.976621 |
| O | 1.510050  | 2.361321  | 0.083970  |
| C | 2.054257  | 2.714255  | -1.154536 |
| O | 3.203057  | 2.399128  | -1.331378 |
| O | -2.169597 | 5.275330  | 1.154047  |

|   |           |           |           |
|---|-----------|-----------|-----------|
| C | -2.539086 | 6.082574  | 0.037415  |
| O | -2.886127 | 7.199387  | 0.272183  |
| O | -2.639859 | 0.522978  | 1.517992  |
| C | -2.964784 | 0.066669  | 2.831174  |
| O | -3.599743 | -0.946116 | 2.882023  |
| C | 1.716574  | -0.492983 | 0.438382  |
| C | 2.289641  | -0.958091 | -0.758310 |
| C | 3.649089  | -1.235914 | -0.827682 |
| C | 4.456579  | -0.959910 | 0.281689  |
| C | 3.923954  | -0.451850 | 1.470503  |
| C | 2.557122  | -0.244255 | 1.541590  |
| O | 1.407481  | -1.220059 | -1.788986 |
| C | 1.551164  | -0.855752 | -3.143279 |
| O | 0.638171  | -1.174213 | -3.855439 |
| O | 1.929153  | 0.327164  | 2.631232  |
| C | 1.769333  | -0.311012 | 3.900365  |
| O | 0.985615  | 0.216708  | 4.636268  |
| O | 5.791893  | -1.258846 | 0.253958  |
| C | 6.730291  | -0.531088 | -0.539416 |
| O | 7.837925  | -0.970025 | -0.595702 |
| C | 0.911072  | -4.408690 | -0.515300 |
| C | -5.377242 | -3.349843 | 0.575302  |
| C | -2.318744 | 0.054666  | -4.060905 |
| C | 2.564838  | -1.555331 | 4.149910  |
| C | 6.213697  | 0.725770  | -1.187932 |
| C | 2.782051  | -0.109569 | -3.574243 |
| C | 1.171502  | 3.418529  | -2.146840 |
| C | -2.439866 | 0.888726  | 3.971634  |
| C | -2.469987 | 5.415862  | -1.312163 |
| H | -3.457669 | 3.069164  | 1.689100  |
| H | 0.296585  | 4.719636  | 0.378144  |
| H | -2.289584 | -4.510155 | 0.160867  |
| H | -3.801052 | -1.358251 | -2.341818 |
| H | 4.579264  | -0.221340 | 2.301596  |
| H | 4.087735  | -1.677734 | -1.713562 |
| H | -1.864931 | -0.929112 | -3.938502 |
| H | -3.403825 | -0.056241 | -4.166415 |
| H | -1.940571 | 0.535058  | -4.963781 |
| H | -6.363837 | -3.516242 | 1.006153  |
| H | -4.615766 | -3.725815 | 1.266060  |
| H | -5.192086 | -2.279330 | 0.446771  |
| H | 0.149682  | -5.191771 | -0.590222 |
| H | 0.699072  | -3.665565 | -1.289861 |
| H | 1.897350  | -4.846682 | -0.664030 |
| H | 3.163569  | 0.563819  | -2.804748 |
| H | 3.564964  | -0.831900 | -3.831188 |
| H | 2.529465  | 0.443499  | -4.479749 |
| H | 2.412295  | -2.285059 | 3.347714  |
| H | 3.632816  | -1.321936 | 4.198713  |
| H | 2.244335  | -1.973487 | 5.103574  |
| H | 5.562431  | 1.297472  | -0.522265 |
| H | 7.071629  | 1.322861  | -1.495943 |
| H | 5.626686  | 0.471401  | -2.076633 |
| H | 0.143100  | 3.048660  | -2.134727 |
| H | 1.152811  | 4.489342  | -1.915874 |

|   |           |           |           |
|---|-----------|-----------|-----------|
| H | 1.612861  | 3.295710  | -3.136213 |
| H | -1.351963 | 1.003984  | 3.903298  |
| H | -2.880172 | 1.890485  | 3.958000  |
| H | -2.698442 | 0.386937  | 4.903112  |
| H | -2.896945 | 4.409390  | -1.294135 |
| H | -3.000534 | 6.043798  | -2.027119 |
| H | -1.426841 | 5.319841  | -1.630339 |
| H | -0.234267 | -0.747368 | 2.016506  |

# 61. TPP protonated. R = OH

E<sub>elec</sub> = -1714.529290 a.u.; H = -1714.185837 a.u

|   |           |           |           |
|---|-----------|-----------|-----------|
| C | -2.216093 | -0.759986 | -0.929527 |
| C | -1.407425 | -0.997759 | 0.203617  |
| C | -1.763827 | -2.066159 | 1.053413  |
| C | -2.891570 | -2.845679 | 0.816053  |
| C | -3.682205 | -2.563358 | -0.304797 |
| C | -3.347005 | -1.527466 | -1.181367 |
| P | 0.002029  | -0.004061 | 0.648504  |
| C | -0.156494 | 1.714276  | 0.208653  |
| C | -0.942618 | 2.541260  | 1.043670  |
| C | -1.070804 | 3.904026  | 0.816049  |
| C | -0.409940 | 4.467777  | -0.279798 |
| C | 0.359294  | 3.678880  | -1.143162 |
| C | 0.475130  | 2.311641  | -0.900498 |
| O | -1.572491 | 1.914911  | 2.082039  |
| O | -0.567985 | 5.804793  | -0.455898 |
| O | 1.191163  | 1.497408  | -1.723743 |
| O | -0.932204 | -2.294436 | 2.113762  |
| O | -4.798043 | -3.274258 | -0.610633 |
| O | -1.833831 | 0.245649  | -1.763046 |
| C | 1.571011  | -0.725759 | 0.213165  |
| C | 1.775759  | -1.565895 | -0.899757 |
| C | 3.017503  | -2.150797 | -1.139969 |
| C | 4.081786  | -1.886051 | -0.270000 |
| C | 3.920964  | -1.037265 | 0.829592  |
| C | 2.676899  | -0.465046 | 1.054603  |
| O | 0.715394  | -1.771186 | -1.728145 |
| O | 2.446648  | 0.389475  | 2.095503  |
| O | 5.318423  | -2.419535 | -0.443358 |
| H | -3.973207 | -1.341904 | -2.048879 |
| H | -3.146030 | -3.664603 | 1.485129  |
| H | -1.673907 | 4.535372  | 1.461193  |
| H | 0.857698  | 4.124349  | -2.001600 |
| H | 4.766796  | -0.835985 | 1.479668  |
| H | 3.156662  | -2.800819 | -2.001278 |
| H | 3.245664  | 0.470223  | 2.642039  |
| H | 5.332012  | -2.993733 | -1.227134 |
| H | 0.965316  | -2.388345 | -2.434985 |
| H | -1.286517 | -3.006886 | 2.670507  |
| H | -2.482342 | 0.335807  | -2.480558 |
| H | -4.951732 | -3.965343 | 0.054939  |
| H | 1.604634  | 2.024861  | -2.426455 |
| H | -2.049087 | 2.566480  | 2.622363  |
| H | -0.072940 | 6.103870  | -1.236718 |
| H | -0.002245 | -0.004840 | 2.042717  |



**62. TPP protonated. R = SO<sub>3</sub>H****E<sub>elec</sub>** = -6653.222295 a.u.; **H** = -6652.760653 a.u

|   |           |           |           |
|---|-----------|-----------|-----------|
| C | -1.923535 | -2.150908 | 0.893919  |
| C | -1.405940 | -1.093446 | 0.112455  |
| C | -2.100047 | -0.770293 | -1.063695 |
| C | -3.306912 | -1.370939 | -1.413417 |
| C | -3.806370 | -2.377554 | -0.598573 |
| C | -3.107901 | -2.789799 | 0.533750  |
| P | 0.062203  | -0.146213 | 0.665421  |
| C | 1.721554  | -0.856297 | 0.270983  |
| C | 2.782231  | -0.514468 | 1.152129  |
| C | 4.120686  | -0.704818 | 0.812285  |
| C | 4.433708  | -1.240478 | -0.427097 |
| C | 3.429017  | -1.745753 | -1.241132 |
| C | 2.088208  | -1.602410 | -0.883651 |
| S | 2.561024  | 0.051324  | 2.862612  |
| O | 1.769678  | 1.410769  | 2.701223  |
| S | 6.151726  | -1.423284 | -0.927190 |
| O | 6.178617  | -2.446464 | -1.932332 |
| S | 0.994137  | -2.620334 | -1.927798 |
| O | -0.094996 | -3.108045 | -1.120560 |
| S | -1.352758 | 0.334764  | -2.239020 |
| O | 0.051829  | 0.355481  | -1.822370 |
| S | -5.380024 | -3.147475 | -1.011806 |
| O | -4.883966 | -4.341952 | -1.976261 |
| S | -1.227717 | -2.769011 | 2.439971  |
| O | -1.661938 | -4.123291 | 2.599109  |
| C | -0.196981 | 1.681224  | 0.497311  |
| C | -1.377035 | 2.182751  | 1.105363  |
| C | -1.940006 | 3.390342  | 0.676084  |
| C | -1.294890 | 4.147182  | -0.285962 |
| C | -0.008999 | 3.808329  | -0.698333 |
| C | 0.536519  | 2.587345  | -0.320595 |
| S | -2.102636 | 1.605290  | 2.691194  |
| O | -3.079284 | 2.593912  | 3.044749  |
| S | 2.306920  | 2.394894  | -0.677944 |
| O | 2.628026  | 1.265296  | -1.509033 |
| S | -2.038717 | 5.660562  | -0.907309 |
| O | -2.507054 | 5.178115  | -2.372205 |
| O | -0.987672 | 1.283789  | 3.549519  |
| O | -2.863662 | 0.258432  | 2.319540  |
| O | 2.656311  | 3.730475  | -1.477181 |
| O | 2.957994  | 2.559016  | 0.611764  |
| O | -3.200823 | 5.940925  | -0.105175 |
| O | -0.966490 | 6.587265  | -1.131419 |
| O | 1.622430  | -0.859275 | 3.500444  |
| O | 3.859229  | 0.259632  | 3.430601  |
| O | 0.763193  | -1.998294 | -3.213324 |
| O | 1.961138  | -3.841508 | -2.284757 |
| O | 6.384931  | -0.018241 | -1.684151 |
| O | 6.957197  | -1.442446 | 0.267210  |
| O | -2.107112 | 1.546194  | -2.374072 |
| O | -1.437437 | -0.448048 | -3.600404 |
| O | -5.916843 | -3.722009 | 0.195590  |

|   |           |           |           |
|---|-----------|-----------|-----------|
| O | -6.081587 | -2.211163 | -1.841159 |
| O | -1.523464 | -1.762791 | 3.455260  |
| O | 0.335573  | -2.752537 | 2.160306  |
| H | 3.703135  | -2.284281 | -2.141708 |
| H | 4.899970  | -0.438897 | 1.518792  |
| H | -3.834393 | -1.077991 | -2.316236 |
| H | -3.489576 | -3.600903 | 1.145965  |
| H | 0.555349  | 4.510555  | -1.298369 |
| H | -2.859900 | 3.743133  | 1.130953  |
| H | 0.808508  | -2.131941 | 2.802455  |
| H | -4.963907 | -5.189337 | -1.494448 |
| H | -0.668626 | -1.092856 | -3.631921 |
| H | 2.303132  | 2.031746  | 2.124584  |
| H | 6.944211  | 0.551278  | -1.118743 |
| H | 1.928719  | -4.512279 | -1.571898 |
| H | -2.471980 | -0.476661 | 2.883138  |
| H | 2.734897  | 3.523403  | -2.431219 |
| H | -3.442726 | 4.896062  | -2.336061 |
| H | -0.041523 | -0.271518 | 2.051835  |

### 3. FLP cartesian coordinates

#### 63. FLP<sub>1</sub>: Acid R = NH<sub>2</sub>. Base R = CN

$E_{\text{elec}} = -3086.105920$  a.u.;  $H = -3085.370007$  a.u

|   |           |           |           |
|---|-----------|-----------|-----------|
| C | 2.686509  | 2.633130  | 0.511700  |
| C | 2.808733  | 1.511851  | -0.346041 |
| C | 3.264874  | 1.750389  | -1.660873 |
| C | 3.503781  | 3.054109  | -2.113653 |
| C | 3.324220  | 4.146838  | -1.258318 |
| C | 2.943984  | 3.932675  | 0.071392  |
| P | 2.080915  | -0.026654 | 0.341823  |
| C | 1.858887  | -1.193441 | -1.046910 |
| C | 2.454484  | -2.467871 | -1.212785 |
| C | 2.064913  | -3.302520 | -2.273373 |
| C | 1.091054  | -2.889592 | -3.182248 |
| C | 0.473794  | -1.638227 | -3.031864 |
| C | 0.864978  | -0.804238 | -1.977326 |
| C | 3.496172  | -2.966128 | -0.374796 |
| N | 4.345212  | -3.435221 | 0.267887  |
| C | 0.691894  | -3.748655 | -4.249433 |
| N | 0.327212  | -4.450969 | -5.101950 |
| C | 0.313802  | 0.511072  | -1.929996 |
| N | -0.053236 | 1.614104  | -1.964986 |
| C | 3.558154  | 0.687775  | -2.571186 |
| N | 3.837001  | -0.139098 | -3.338502 |
| C | 3.541476  | 5.477198  | -1.732149 |
| N | 3.716189  | 6.561504  | -2.111179 |
| C | 2.310693  | 2.424676  | 1.876479  |
| N | 2.037099  | 2.249664  | 2.993898  |
| C | 3.336506  | -0.720643 | 1.487181  |
| C | 2.810780  | -1.570351 | 2.492151  |
| C | 3.615951  | -2.107114 | 3.499829  |
| C | 4.975139  | -1.777419 | 3.549658  |
| C | 5.518065  | -0.924390 | 2.583077  |
| C | 4.711910  | -0.406520 | 1.560451  |

|   |           |           |           |
|---|-----------|-----------|-----------|
| C | 1.427013  | -1.938370 | 2.480624  |
| N | 0.320997  | -2.294328 | 2.514824  |
| C | 5.372799  | 0.404481  | 0.585696  |
| N | 5.977592  | 1.046866  | -0.170567 |
| C | 5.804890  | -2.309280 | 4.584759  |
| N | 6.476985  | -2.739252 | 5.429244  |
| H | -0.318224 | 1.027774  | 2.141964  |
| N | -1.228875 | 0.866785  | 1.725834  |
| C | -1.623908 | 1.835281  | 0.795529  |
| C | -2.750264 | 1.587922  | -0.026089 |
| C | -3.129492 | 2.620408  | -0.913866 |
| C | -2.430412 | 3.826892  | -0.999984 |
| C | -1.350847 | 4.060776  | -0.140081 |
| C | -0.967246 | 3.072911  | 0.772482  |
| N | -4.227988 | 2.370602  | -1.768998 |
| B | -3.596007 | 0.248889  | 0.070208  |
| C | -2.891980 | -1.071610 | -0.482888 |
| C | -2.547272 | -2.139682 | 0.397741  |
| C | -1.969985 | -3.332275 | -0.065841 |
| C | -1.849057 | -3.555847 | -1.440290 |
| C | -2.197872 | -2.534201 | -2.339362 |
| C | -2.661380 | -1.288730 | -1.865529 |
| N | -0.602959 | 5.246623  | -0.231320 |
| N | -2.847345 | -2.041218 | 1.749057  |
| N | -1.445077 | -4.793118 | -1.920011 |
| N | -2.878174 | -0.287113 | -2.802149 |
| C | -4.995490 | 0.209062  | 0.703914  |
| C | -5.472953 | 1.230304  | 1.626496  |
| C | -6.619082 | 1.044255  | 2.406438  |
| C | -7.394117 | -0.112497 | 2.279269  |
| C | -7.034960 | -1.086450 | 1.340556  |
| C | -5.889579 | -0.931551 | 0.558912  |
| N | -4.825053 | 2.435461  | 1.768995  |
| N | -8.555091 | -0.258362 | 3.022008  |
| N | -5.678653 | -1.867669 | -0.429278 |
| H | -6.921768 | 1.822771  | 3.104625  |
| H | -7.673194 | -1.955612 | 1.192311  |
| H | -1.715100 | -4.117349 | 0.641851  |
| H | -2.156802 | -2.723566 | -3.410338 |
| H | -0.143301 | 3.257227  | 1.456249  |
| H | -2.731611 | 4.585536  | -1.719940 |
| H | 3.839327  | 3.210639  | -3.132605 |
| H | 2.834425  | 4.768534  | 0.752363  |
| H | 2.546591  | -4.266674 | -2.392383 |
| H | -0.243958 | -1.274102 | -3.754173 |
| H | 6.572904  | -0.674528 | 2.608956  |
| H | 3.184753  | -2.769934 | 4.241399  |
| H | -1.315182 | -0.091969 | 1.400384  |
| H | -1.082254 | 6.008865  | -0.698321 |
| H | -0.210147 | 5.555795  | 0.651436  |
| H | -4.602868 | 3.206918  | -2.205731 |
| H | -4.969676 | 1.850759  | -1.297691 |
| H | -5.021965 | 2.958093  | 2.611674  |
| H | -3.878172 | 2.515466  | 1.412042  |
| H | -8.910284 | -1.200316 | 3.124461  |

|   |           |           |           |
|---|-----------|-----------|-----------|
| H | -8.623565 | 0.292744  | 3.867839  |
| H | -6.137211 | -2.760566 | -0.303126 |
| H | -4.739839 | -1.928895 | -0.810230 |
| H | -3.108021 | -0.591381 | -3.739253 |
| H | -3.356082 | 0.570912  | -2.526071 |
| H | -1.169503 | -4.867964 | -2.889752 |
| H | -0.943371 | -5.401533 | -1.288465 |
| H | -2.232934 | -2.531452 | 2.386923  |
| H | -3.174863 | -1.144075 | 2.088840  |

**64. FLP<sub>2</sub>: Acid R = OCH<sub>3</sub>. Base R = CF<sub>3</sub>**  
**E<sub>elec</sub> = -5823.212835 a.u.; H = -5822.259834 a.u**

|   |           |           |           |
|---|-----------|-----------|-----------|
| C | 1.679046  | -0.556419 | 2.637294  |
| C | 2.553350  | -0.763671 | 1.527939  |
| C | 3.560983  | -1.748999 | 1.697347  |
| C | 3.689781  | -2.450381 | 2.899899  |
| C | 2.855805  | -2.185999 | 3.972522  |
| C | 1.850659  | -1.237231 | 3.837867  |
| P | 2.014228  | 0.113038  | -0.016622 |
| B | -4.213102 | -0.303147 | -0.033976 |
| C | -4.011638 | -1.799743 | -0.463173 |
| C | -4.633879 | -2.347570 | -1.614222 |
| C | -4.402487 | -3.646264 | -2.066403 |
| C | -3.520955 | -4.460875 | -1.351726 |
| C | -2.901229 | -3.999931 | -0.191085 |
| C | -3.161612 | -2.688113 | 0.230609  |
| C | 4.542574  | -2.209852 | 0.626171  |
| F | 5.030344  | -1.223008 | -0.149100 |
| C | 2.981310  | -2.958969 | 5.262085  |
| F | 4.192908  | -3.551314 | 5.389965  |
| C | 0.446039  | 0.350397  | 2.587203  |
| F | -0.494207 | -0.129149 | 1.757020  |
| C | 2.648253  | -0.718626 | -1.551195 |
| C | 3.615653  | -0.265900 | -2.486007 |
| C | 3.830797  | -0.946058 | -3.688237 |
| C | 3.123152  | -2.095944 | -3.993820 |
| C | 2.153902  | -2.555358 | -3.112028 |
| C | 1.897664  | -1.872709 | -1.927360 |
| C | 3.345521  | -2.816679 | -5.300807 |
| F | 4.554217  | -2.531903 | -5.843095 |
| C | 4.455448  | 0.999194  | -2.352065 |
| F | 4.919971  | 1.234468  | -1.110046 |
| C | 0.711382  | -2.410810 | -1.122898 |
| F | -0.333857 | -1.565969 | -1.146650 |
| C | 2.440859  | 1.919348  | 0.022482  |
| C | 1.581146  | 2.724260  | -0.783318 |
| C | 1.672747  | 4.112118  | -0.787619 |
| C | 2.577267  | 4.759794  | 0.043536  |
| C | 3.389516  | 4.012293  | 0.879449  |
| C | 3.339438  | 2.615262  | 0.872320  |
| C | 0.445392  | 2.153923  | -1.636420 |
| F | 0.869379  | 1.194900  | -2.509527 |
| C | 2.677156  | 6.265139  | 0.013825  |

|   |           |           |           |
|---|-----------|-----------|-----------|
| F | 1.459350  | 6.844826  | -0.145475 |
| C | 4.266821  | 1.976023  | 1.899298  |
| F | 4.855276  | 0.835617  | 1.491870  |
| C | -4.382421 | 0.823893  | -1.119524 |
| C | -3.616679 | 0.867184  | -2.308259 |
| C | -3.718656 | 1.895982  | -3.245010 |
| C | -4.629437 | 2.929283  | -3.015244 |
| C | -5.431414 | 2.937809  | -1.873245 |
| C | -5.289831 | 1.887791  | -0.953200 |
| C | -4.202149 | 0.101483  | 1.486887  |
| C | -4.850435 | -0.669983 | 2.479578  |
| C | -4.809715 | -0.358177 | 3.838517  |
| C | -4.095688 | 0.771531  | 4.247227  |
| C | -3.453621 | 1.589239  | 3.318247  |
| C | -3.525393 | 1.241223  | 1.960578  |
| F | 2.799072  | -2.159372 | 6.343859  |
| F | 2.043535  | -3.944472 | 5.339084  |
| F | -0.130572 | 0.468786  | 3.812789  |
| F | 0.736808  | 1.626088  | 2.197995  |
| F | 5.624020  | -2.823199 | 1.174843  |
| F | 3.967953  | -3.131114 | -0.201827 |
| F | 5.277863  | 2.815595  | 2.245578  |
| F | 3.596775  | 1.696625  | 3.055719  |
| F | 3.220468  | 6.763799  | 1.151337  |
| F | 3.454160  | 6.688959  | -1.019904 |
| F | 0.273195  | -3.597109 | -1.621594 |
| F | 1.020818  | -2.657306 | 0.183204  |
| F | -0.530651 | 1.623037  | -0.879341 |
| F | -0.130868 | 3.115436  | -2.403730 |
| F | 5.548578  | 0.958414  | -3.158092 |
| F | 3.745609  | 2.100080  | -2.736301 |
| F | 3.271459  | -4.163409 | -5.147770 |
| F | 2.402639  | -2.472087 | -6.221121 |
| H | -5.317015 | -0.948373 | 4.591529  |
| H | -2.885291 | 2.452063  | 3.636689  |
| H | -4.888671 | -4.056114 | -2.942810 |
| H | -2.204953 | -4.623531 | 0.352156  |
| H | -3.105314 | 1.937219  | -4.136507 |
| H | -6.159163 | 3.720760  | -1.710873 |
| H | 4.464489  | -3.199569 | 2.999415  |
| H | 1.181830  | -1.040684 | 4.665974  |
| H | 1.012653  | 4.691246  | -1.420519 |
| H | 4.077599  | 4.517338  | 1.544933  |
| H | 4.574140  | -0.577675 | -4.383259 |
| H | 1.580585  | -3.440431 | -3.356135 |
| O | -4.081748 | 0.999320  | 5.602665  |
| O | -2.875466 | 1.987869  | 1.009341  |
| O | -2.721076 | -0.157967 | -2.472581 |
| O | -6.081504 | 1.817758  | 0.166315  |
| O | -2.539326 | -2.180629 | 1.340423  |
| O | -5.521957 | -1.522152 | -2.249660 |
| O | -3.325970 | -5.715813 | -1.873041 |
| O | -4.668709 | 3.904158  | -3.983319 |
| O | -5.559807 | -1.745304 | 2.010062  |
| C | -6.914444 | 2.926203  | 0.488565  |

|   |           |           |           |
|---|-----------|-----------|-----------|
| H | -7.360538 | 2.680334  | 1.453836  |
| H | -6.331152 | 3.853186  | 0.577632  |
| H | -7.709921 | 3.064639  | -0.257224 |
| C | -2.065459 | -0.289578 | -3.730387 |
| H | -1.508412 | -1.225663 | -3.667043 |
| H | -2.792131 | -0.345441 | -4.551973 |
| H | -1.368970 | 0.538864  | -3.913317 |
| C | -5.570504 | 4.993894  | -3.786501 |
| H | -5.432542 | 5.647353  | -4.649559 |
| H | -6.612168 | 4.647620  | -3.749835 |
| H | -5.335075 | 5.544007  | -2.865498 |
| C | -2.328916 | 3.248673  | 1.378778  |
| H | -1.982200 | 3.694847  | 0.444967  |
| H | -3.090219 | 3.895464  | 1.835889  |
| H | -1.479482 | 3.138030  | 2.066312  |
| C | -3.349925 | 2.132623  | 6.071965  |
| H | -3.461258 | 2.123725  | 7.157529  |
| H | -2.286335 | 2.055148  | 5.808710  |
| H | -3.760047 | 3.067584  | 5.667189  |
| C | -6.139831 | -2.639925 | 2.954738  |
| H | -6.579514 | -3.442577 | 2.360127  |
| H | -5.379633 | -3.054013 | 3.631314  |
| H | -6.924043 | -2.147656 | 3.546107  |
| C | -6.061758 | -1.935349 | -3.502013 |
| H | -6.650467 | -1.086971 | -3.855024 |
| H | -5.264749 | -2.158817 | -4.223975 |
| H | -6.711179 | -2.814349 | -3.390341 |
| C | -1.851750 | -3.067676 | 2.215851  |
| H | -1.590500 | -2.462800 | 3.086164  |
| H | -2.497078 | -3.899954 | 2.527273  |
| H | -0.935507 | -3.463152 | 1.757526  |
| C | -2.419810 | -6.581936 | -1.186539 |
| H | -2.406316 | -7.507491 | -1.764375 |
| H | -1.410013 | -6.151823 | -1.152314 |
| H | -2.765146 | -6.790072 | -0.165157 |

**65. FLP<sub>3</sub>. Acid R = NH<sub>2</sub>. Base R = H**

**E<sub>elec</sub>** = -2255.510801 a.u.; **H** = -2254.774756 a.u

|   |          |           |           |
|---|----------|-----------|-----------|
| C | 4.919398 | -1.610318 | -2.045421 |
| C | 4.582100 | -1.207094 | -0.743283 |
| C | 5.410961 | -1.594571 | 0.319793  |
| C | 6.552108 | -2.362047 | 0.083587  |
| C | 6.885274 | -2.745788 | -1.216575 |
| C | 6.067242 | -2.365415 | -2.282497 |
| P | 3.057274 | -0.198246 | -0.546368 |
| C | 2.734656 | -0.332063 | 1.260336  |
| C | 2.922114 | 0.723489  | 2.164092  |
| C | 2.588939 | 0.569136  | 3.512475  |
| C | 2.073514 | -0.642227 | 3.976962  |
| C | 1.890799 | -1.701967 | 3.084247  |
| C | 2.210472 | -1.546370 | 1.737217  |
| H | 3.322184 | 1.670030  | 1.813079  |
| H | 1.808087 | -0.757139 | 5.024309  |
| H | 2.034562 | -2.369270 | 1.051108  |
| H | 5.160313 | -1.295757 | 1.333678  |

|   |           |           |           |
|---|-----------|-----------|-----------|
| H | 7.775075  | -3.342725 | -1.398097 |
| H | 4.276188  | -1.326628 | -2.875858 |
| C | 3.680751  | 1.521814  | -0.710119 |
| C | 2.714039  | 2.537833  | -0.798825 |
| C | 3.096881  | 3.873987  | -0.909413 |
| C | 4.452086  | 4.208270  | -0.963412 |
| C | 5.419448  | 3.203955  | -0.896576 |
| C | 5.038361  | 1.867805  | -0.763099 |
| H | 1.656570  | 2.286956  | -0.757346 |
| H | 5.797322  | 1.093005  | -0.700121 |
| H | 4.753561  | 5.248007  | -1.062097 |
| C | -0.671693 | 3.782664  | 0.369266  |
| C | -1.660150 | 3.679618  | -0.614836 |
| C | -2.334745 | 2.467338  | -0.808427 |
| C | -2.030010 | 1.301501  | -0.037827 |
| C | -1.001688 | 1.446268  | 0.948735  |
| C | -0.345276 | 2.669516  | 1.150708  |
| B | -2.795304 | -0.057975 | -0.262632 |
| C | -4.356659 | -0.086551 | -0.360299 |
| C | -5.044935 | -1.029655 | -1.202024 |
| C | -6.434577 | -1.177293 | -1.172518 |
| C | -7.207275 | -0.397364 | -0.304415 |
| C | -6.589587 | 0.562169  | 0.504400  |
| C | -5.200324 | 0.743174  | 0.461111  |
| N | -4.330424 | -1.764670 | -2.135265 |
| N | -8.583100 | -0.608358 | -0.212472 |
| N | -4.668520 | 1.757557  | 1.234882  |
| N | -3.255860 | 2.383629  | -1.847395 |
| N | 0.041780  | 4.979498  | 0.519936  |
| N | -0.709495 | 0.400462  | 1.811947  |
| C | -1.951477 | -1.388968 | -0.318770 |
| C | -2.317873 | -2.559417 | 0.427032  |
| C | -1.441091 | -3.645385 | 0.568434  |
| C | -0.209579 | -3.649941 | -0.093818 |
| C | 0.147984  | -2.570460 | -0.905321 |
| C | -0.689170 | -1.450308 | -0.997717 |
| N | -3.560559 | -2.657040 | 1.032669  |
| N | -0.288820 | -0.421169 | -1.837550 |
| N | 0.696592  | -4.698733 | 0.107609  |
| H | 0.721492  | -0.317064 | -1.910007 |
| H | -6.916371 | -1.897003 | -1.831853 |
| H | -7.192445 | 1.186158  | 1.162186  |
| H | -1.892637 | 4.535903  | -1.245446 |
| H | 0.422597  | 2.746511  | 1.917838  |
| H | 1.086742  | -2.584018 | -1.454365 |
| H | -1.734642 | -4.498330 | 1.178348  |
| H | 7.184454  | -2.657105 | 0.917143  |
| H | 6.317735  | -2.664895 | -3.296842 |
| H | 2.733483  | 1.398959  | 4.199739  |
| H | 1.479804  | -2.646686 | 3.429314  |
| H | 6.475178  | 3.459835  | -0.941368 |
| H | 2.329749  | 4.642137  | -0.946559 |
| H | -0.762600 | 0.463909  | -1.678915 |
| H | -3.633485 | -3.275668 | 1.828763  |
| H | -4.117006 | -1.810956 | 1.088638  |

|   |           |           |           |
|---|-----------|-----------|-----------|
| H | 0.277162  | -5.577319 | 0.390205  |
| H | 1.366933  | -4.827851 | -0.642095 |
| H | -9.120104 | 0.177151  | 0.135248  |
| H | -9.010601 | -1.035611 | -1.025423 |
| H | -5.205081 | 2.052668  | 2.038686  |
| H | -3.659932 | 1.788875  | 1.339430  |
| H | -4.754994 | -2.641275 | -2.412159 |
| H | -3.334467 | -1.846670 | -1.942044 |
| H | -3.919533 | 1.616742  | -1.764007 |
| H | -3.693359 | 3.259440  | -2.105846 |
| H | -0.462258 | 5.810747  | 0.232382  |
| H | 0.476791  | 5.100741  | 1.427464  |
| H | -0.914535 | -0.527290 | 1.453174  |
| H | 0.188194  | 0.454811  | 2.278653  |

**66. FLP<sub>4</sub>: Acid R = OCH<sub>3</sub>. Base R = H**

**E<sub>elec</sub>** = -2788.295829 a.u.; **H** = -2787.409925 a.u

|   |           |           |           |
|---|-----------|-----------|-----------|
| C | -3.422694 | -2.746597 | 3.678023  |
| C | -2.271587 | -2.424033 | 4.397951  |
| C | -1.354400 | -1.503074 | 3.886500  |
| C | -1.569415 | -0.899577 | 2.639396  |
| C | -2.725209 | -1.242004 | 1.917461  |
| C | -3.648620 | -2.147478 | 2.435845  |
| P | -0.396484 | 0.268551  | 1.831071  |
| C | 1.046851  | 0.194295  | 2.972899  |
| C | 1.941737  | -0.874615 | 2.795414  |
| C | 3.084865  | -0.988036 | 3.583551  |
| C | 3.368802  | -0.019681 | 4.550635  |
| C | 2.494349  | 1.053439  | 4.726809  |
| C | 1.338333  | 1.157198  | 3.949322  |
| B | 0.270873  | -0.272902 | -1.491008 |
| C | 1.382522  | -1.339170 | -1.142530 |
| C | 1.158595  | -2.459572 | -0.303032 |
| C | 2.157291  | -3.375305 | 0.035671  |
| C | 3.441327  | -3.200869 | -0.483310 |
| C | 3.722708  | -2.144363 | -1.347563 |
| C | 2.689539  | -1.249578 | -1.666251 |
| C | 0.670586  | 1.242182  | -1.695109 |
| C | 0.084060  | 2.040363  | -2.709385 |
| C | 0.368362  | 3.395277  | -2.885967 |
| C | 1.296567  | 4.003867  | -2.041010 |
| C | 1.950273  | 3.268272  | -1.052935 |
| C | 1.632108  | 1.907884  | -0.906003 |
| C | -1.216847 | -0.736640 | -1.743291 |
| C | -1.520640 | -1.978654 | -2.356681 |
| C | -2.821078 | -2.448167 | -2.545534 |
| C | -3.890410 | -1.651349 | -2.136310 |
| C | -3.668364 | -0.396439 | -1.569952 |
| C | -2.344082 | 0.036848  | -1.392538 |
| C | -1.134701 | 1.898391  | 2.270309  |
| C | -2.233360 | 2.067409  | 3.124692  |
| C | -2.767345 | 3.337858  | 3.353145  |
| C | -2.204547 | 4.459547  | 2.742872  |
| C | -1.106450 | 4.302567  | 1.892744  |
| C | -0.585343 | 3.033420  | 1.650184  |



|   |           |           |           |
|---|-----------|-----------|-----------|
| H | -0.089350 | 3.991098  | -3.665654 |
| H | 2.672370  | 3.737268  | -0.399635 |
| H | -3.035438 | -3.399528 | -3.016024 |
| H | -4.495888 | 0.222775  | -1.253968 |
| H | 1.980177  | -4.210011 | 0.701940  |
| H | 4.704639  | -2.030879 | -1.785525 |
| H | -3.622603 | 3.450117  | 4.015191  |
| H | -0.668306 | 5.166075  | 1.397906  |
| H | 3.762480  | -1.823739 | 3.426977  |
| H | 2.706962  | 1.811443  | 5.476915  |
| H | -2.086582 | -2.886458 | 5.364507  |
| H | -4.533271 | -2.402115 | 1.857067  |
| O | 1.510999  | 5.342792  | -2.263591 |
| O | 2.229980  | 1.162626  | 0.077600  |
| O | -0.103847 | -2.579601 | 0.214385  |
| O | 2.901111  | -0.238305 | -2.567546 |
| O | -2.088584 | 1.247693  | -0.803024 |
| O | -0.442727 | -2.695412 | -2.802498 |
| O | -5.139182 | -2.186669 | -2.339562 |
| O | 4.368138  | -4.134626 | -0.087040 |
| O | -0.771227 | 1.384635  | -3.554384 |
| H | -2.621388 | 5.447105  | 2.922818  |
| H | 0.236779  | 2.918154  | 0.950627  |
| H | -2.676619 | 1.202404  | 3.609879  |
| H | 0.662203  | 1.993955  | 4.100082  |
| H | 4.266357  | -0.099191 | 5.158529  |
| H | -2.888402 | -0.818251 | 0.931374  |
| H | 1.755365  | -1.608355 | 2.017419  |
| H | -0.464153 | -1.256570 | 4.458130  |
| H | -4.134852 | -3.463708 | 4.077988  |
| C | 4.233256  | 0.060837  | -2.969868 |
| H | 4.154656  | 0.968065  | -3.571618 |
| H | 4.879690  | 0.248606  | -2.101591 |
| H | 4.663697  | -0.745882 | -3.579812 |
| C | 5.702381  | -3.987685 | -0.575999 |
| H | 6.268801  | -4.807600 | -0.131350 |
| H | 5.736317  | -4.067951 | -1.670766 |
| H | 6.135701  | -3.027557 | -0.265432 |
| C | -0.415430 | -3.736635 | 0.992191  |
| H | -1.475258 | -3.645953 | 1.229142  |
| H | -0.231954 | -4.656248 | 0.421162  |
| H | 0.162987  | -3.758594 | 1.925044  |
| C | -0.647025 | -4.033336 | -3.247731 |
| H | 0.352701  | -4.429728 | -3.433647 |
| H | -1.146955 | -4.636160 | -2.477805 |
| H | -1.234376 | -4.064469 | -4.175645 |
| C | -6.264938 | -1.407782 | -1.931519 |
| H | -7.141284 | -2.011320 | -2.173391 |
| H | -6.240288 | -1.208996 | -0.851403 |
| H | -6.310444 | -0.456124 | -2.477597 |
| C | -3.181876 | 2.120741  | -0.520418 |
| H | -2.727643 | 3.033558  | -0.135696 |
| H | -3.757865 | 2.340429  | -1.429374 |
| H | -3.844051 | 1.698469  | 0.247102  |
| C | -1.536618 | 2.148557  | -4.481534 |

|   |           |          |           |
|---|-----------|----------|-----------|
| H | -2.208654 | 1.432473 | -4.957758 |
| H | -2.123044 | 2.923600 | -3.969706 |
| H | -0.897955 | 2.616810 | -5.243035 |
| C | 3.277445  | 1.750475 | 0.848101  |
| H | 3.631542  | 0.955280 | 1.504007  |
| H | 4.094863  | 2.100249 | 0.202957  |
| H | 2.906451  | 2.582205 | 1.461568  |
| C | 2.447658  | 6.010004 | -1.416533 |
| H | 2.459031  | 7.047924 | -1.753242 |
| H | 2.133702  | 5.966537 | -0.364683 |
| H | 3.452941  | 5.579233 | -1.516003 |

**67. FLP<sub>5</sub>: Acid R = OCH<sub>3</sub>. Base R = OCH<sub>3</sub>**

**E<sub>elec</sub> = -3819.582917 a.u.; H = 3818.387941 a.u**

|   |           |           |           |
|---|-----------|-----------|-----------|
| C | -2.909239 | 2.851481  | -3.776472 |
| C | -3.565909 | 1.621279  | -3.749810 |
| C | -3.399347 | 0.773230  | -2.649705 |
| C | -2.542084 | 1.099946  | -1.576811 |
| C | -1.923347 | 2.361419  | -1.643388 |
| C | -2.093087 | 3.247639  | -2.715910 |
| P | -2.011208 | 0.034398  | -0.169041 |
| C | -2.802713 | -1.605811 | -0.451086 |
| C | -2.196311 | -2.408464 | -1.444486 |
| C | -2.572040 | -3.728124 | -1.688659 |
| C | -3.588868 | -4.290234 | -0.912621 |
| C | -4.237361 | -3.539416 | 0.065821  |
| C | -3.853360 | -2.200644 | 0.266751  |
| B | 3.239155  | -0.030615 | 0.211404  |
| C | 3.352506  | -0.689726 | -1.206977 |
| C | 2.651727  | -0.200765 | -2.337498 |
| C | 2.674685  | -0.845247 | -3.576211 |
| C | 3.420371  | -2.017429 | -3.718277 |
| C | 4.154139  | -2.537093 | -2.651604 |
| C | 4.109156  | -1.856373 | -1.425859 |
| C | 3.146519  | -0.943272 | 1.491914  |
| C | 3.854380  | -0.668297 | 2.679771  |
| C | 3.712773  | -1.409276 | 3.850150  |
| C | 2.831029  | -2.489254 | 3.861827  |
| C | 2.123323  | -2.838620 | 2.708421  |
| C | 2.292536  | -2.066447 | 1.549212  |
| C | 3.229953  | 1.528404  | 0.386467  |
| C | 4.051148  | 2.378504  | -0.392508 |
| C | 4.069186  | 3.766216  | -0.251860 |
| C | 3.248533  | 4.351216  | 0.715574  |
| C | 2.421465  | 3.572790  | 1.524317  |
| C | 2.418403  | 2.180725  | 1.339321  |
| C | -2.827858 | 0.738802  | 1.326910  |
| C | -3.745614 | 1.809572  | 1.396600  |
| C | -4.132730 | 2.377351  | 2.615108  |
| C | -3.644992 | 1.843645  | 3.807773  |
| C | -2.786198 | 0.743447  | 3.798334  |
| C | -2.394842 | 0.217474  | 2.559320  |
| H | 4.289415  | -1.155355 | 4.732455  |
| H | 1.453365  | -3.687695 | 2.705910  |
| H | 4.711365  | 4.407850  | -0.842078 |

|   |           |           |           |
|---|-----------|-----------|-----------|
| H | 1.788757  | 4.028733  | 2.273002  |
| H | 2.129860  | -0.475061 | -4.435748 |
| H | 4.760032  | -3.424793 | -2.770408 |
| H | -4.826290 | 3.207490  | 2.667773  |
| H | -2.427412 | 0.306313  | 4.719694  |
| H | -2.108101 | -4.332783 | -2.457713 |
| H | -5.046486 | -3.964010 | 0.643986  |
| H | -4.214175 | 1.365741  | -4.578792 |
| H | -1.600932 | 4.210230  | -2.716480 |
| O | 2.727833  | -3.169321 | 5.054448  |
| O | 1.599070  | -2.346674 | 0.403173  |
| O | 1.913286  | 0.928977  | -2.136040 |
| O | 4.857276  | -2.280565 | -0.355397 |
| O | 1.581235  | 1.377878  | 2.055273  |
| O | 4.880876  | 1.739589  | -1.277937 |
| O | 3.321464  | 5.720927  | 0.796615  |
| O | 3.371011  | -2.594269 | -4.965085 |
| O | 4.730061  | 0.402671  | 2.760188  |
| O | -4.083420 | 2.461547  | 4.955815  |
| O | -1.569156 | -0.874399 | 2.469371  |
| O | -4.265179 | 2.246751  | 0.212417  |
| O | -4.518876 | -1.405630 | 1.158096  |
| O | -3.892679 | -5.600559 | -1.200997 |
| O | -1.148832 | 2.679798  | -0.559300 |
| O | -1.217960 | -1.781128 | -2.168303 |
| O | -4.083865 | -0.404262 | -2.551402 |
| O | -3.140499 | 3.621491  | -4.892440 |
| C | 5.439103  | -3.580237 | -0.395417 |
| H | 5.849565  | -3.743048 | 0.602781  |
| H | 4.683429  | -4.346470 | -0.613520 |
| H | 6.248038  | -3.638802 | -1.137274 |
| C | 4.105226  | -3.803710 | -5.162419 |
| H | 3.919794  | -4.092762 | -6.198237 |
| H | 5.181358  | -3.645093 | -5.011322 |
| H | 3.753741  | -4.596634 | -4.488790 |
| C | 1.087456  | 1.398414  | -3.200688 |
| H | 0.608903  | 2.299430  | -2.821564 |
| H | 1.681207  | 1.642743  | -4.092208 |
| H | 0.311159  | 0.665751  | -3.452209 |
| C | 5.631576  | 2.527995  | -2.197579 |
| H | 6.133742  | 1.810422  | -2.848761 |
| H | 4.974858  | 3.173728  | -2.795471 |
| H | 6.380167  | 3.144618  | -1.681247 |
| C | 2.528182  | 6.366334  | 1.794390  |
| H | 2.744810  | 7.431315  | 1.696054  |
| H | 1.456606  | 6.191968  | 1.626385  |
| H | 2.800645  | 6.024763  | 2.801489  |
| C | 0.693014  | 1.972836  | 2.997565  |
| H | 0.152687  | 1.141779  | 3.446363  |
| H | 1.241608  | 2.520705  | 3.775742  |
| H | -0.028836 | 2.634750  | 2.502395  |
| C | 5.845840  | 0.368681  | 1.858059  |
| H | 6.242954  | 1.385249  | 1.822863  |
| H | 6.609878  | -0.326264 | 2.235472  |
| H | 5.551075  | 0.060428  | 0.847952  |

|   |           |           |           |
|---|-----------|-----------|-----------|
| C | 0.607025  | -3.369520 | 0.432757  |
| H | 0.203766  | -3.410004 | -0.576710 |
| H | 1.039732  | -4.345593 | 0.694602  |
| H | -0.204147 | -3.115315 | 1.125551  |
| C | 1.881575  | -4.317450 | 5.087476  |
| H | 1.960232  | -4.710893 | 6.102477  |
| H | 0.835855  | -4.052047 | 4.877982  |
| H | 2.213214  | -5.079783 | 4.369590  |
| C | -0.483044 | 3.941927  | -0.542849 |
| H | 0.094897  | 3.953792  | 0.379825  |
| H | 0.208792  | 4.044964  | -1.388753 |
| H | -1.207004 | 4.768343  | -0.551297 |
| C | -4.842009 | -0.855967 | -3.670267 |
| H | -5.212778 | -1.841057 | -3.382032 |
| H | -5.687897 | -0.187136 | -3.879767 |
| H | -4.213955 | -0.944503 | -4.566811 |
| C | -2.478290 | 4.884242  | -4.967780 |
| H | -2.782116 | 5.317878  | -5.921952 |
| H | -2.787317 | 5.546774  | -4.147753 |
| H | -1.386729 | 4.763283  | -4.948408 |
| C | -5.483016 | -1.989964 | 2.027019  |
| H | -5.794731 | -1.180480 | 2.689385  |
| H | -6.353040 | -2.366959 | 1.471372  |
| H | -5.045273 | -2.804669 | 2.620242  |
| C | -4.938005 | -6.214748 | -0.447168 |
| H | -5.010649 | -7.235907 | -0.825125 |
| H | -4.697856 | -6.234504 | 0.624564  |
| H | -5.895226 | -5.697330 | -0.597849 |
| C | -0.580179 | -2.509050 | -3.220107 |
| H | 0.182660  | -1.841018 | -3.617206 |
| H | -0.093098 | -3.417409 | -2.842140 |
| H | -1.302530 | -2.777244 | -4.002234 |
| C | -5.086087 | 3.411285  | 0.207131  |
| H | -5.305021 | 3.598418  | -0.845461 |
| H | -6.022301 | 3.246149  | 0.757587  |
| H | -4.556844 | 4.273432  | 0.634851  |
| C | -3.601430 | 1.954001  | 6.200416  |
| H | -4.051278 | 2.585536  | 6.968259  |
| H | -3.911964 | 0.911412  | 6.353682  |
| H | -2.506849 | 2.022052  | 6.261340  |
| C | -1.138802 | -1.502451 | 3.675982  |
| H | -0.493970 | -2.321876 | 3.361976  |
| H | -0.552794 | -0.819373 | 4.304573  |
| H | -1.995803 | -1.887238 | 4.245566  |

**68. FLP<sub>6</sub>: Acid R = NH<sub>2</sub>. Base R = NH<sub>2</sub>**

**E<sub>elec</sub>** = -2754.035335 a.u.; **H** = -2753.143558 a.u

|   |           |           |           |
|---|-----------|-----------|-----------|
| C | -3.198522 | 2.517624  | -0.287691 |
| C | -2.748541 | 1.375743  | 0.451217  |
| C | -1.493809 | 1.523667  | 1.132130  |
| C | -0.698749 | 2.671258  | 0.980334  |
| C | -1.124881 | 3.710951  | 0.148485  |
| C | -2.380660 | 3.644415  | -0.467418 |
| B | -3.429147 | -0.040796 | 0.291484  |
| C | -4.977255 | -0.224284 | 0.375808  |

|   |           |           |           |
|---|-----------|-----------|-----------|
| C | -5.782883 | 0.573333  | 1.263523  |
| C | -7.180105 | 0.540075  | 1.231547  |
| C | -7.843779 | -0.285197 | 0.316403  |
| C | -7.106539 | -1.107774 | -0.541778 |
| C | -5.705508 | -1.106552 | -0.499971 |
| N | -5.168624 | 1.346262  | 2.236026  |
| N | -9.235977 | -0.251780 | 0.227382  |
| N | -5.042163 | -1.994024 | -1.325267 |
| N | -1.067307 | 0.559639  | 2.019424  |
| H | -0.067021 | 0.552454  | 2.217596  |
| N | -0.263485 | 4.780005  | -0.128254 |
| N | -4.463016 | 2.536909  | -0.861213 |
| C | -2.465903 | -1.241546 | -0.050963 |
| C | -2.569134 | -2.508461 | 0.603881  |
| C | -1.687916 | -3.564275 | 0.333632  |
| C | -0.660961 | -3.396548 | -0.608503 |
| C | -0.541379 | -2.183476 | -1.292513 |
| C | -1.420333 | -1.124787 | -1.026172 |
| N | 0.298981  | -4.386069 | -0.792919 |
| N | -3.504056 | -2.674463 | 1.626850  |
| N | -1.322267 | 0.000145  | -1.828981 |
| N | 1.024948  | -2.162462 | 1.783686  |
| C | 2.377701  | -2.403779 | 1.574644  |
| C | 3.149234  | -1.513927 | 0.764260  |
| C | 4.559015  | -1.731482 | 0.696268  |
| C | 5.145804  | -2.804522 | 1.382527  |
| C | 4.363098  | -3.676214 | 2.148149  |
| C | 2.982113  | -3.475577 | 2.241556  |
| P | 2.253502  | -0.074118 | 0.080955  |
| C | 2.319376  | -0.025759 | -1.754194 |
| C | 2.664272  | -1.101499 | -2.619297 |
| C | 2.584812  | -0.954890 | -4.012250 |
| C | 2.109001  | 0.225647  | -4.588862 |
| C | 1.674176  | 1.263964  | -3.759179 |
| C | 1.754378  | 1.142032  | -2.364047 |
| N | 5.357766  | -0.962147 | -0.125959 |
| N | 4.971055  | -4.704859 | 2.873619  |
| N | 2.999271  | -2.365194 | -2.129012 |
| N | 1.971485  | 0.328476  | -5.978520 |
| N | 1.350508  | 2.206789  | -1.575593 |
| C | 3.194926  | 1.361781  | 0.738702  |
| C | 4.078656  | 2.226522  | 0.047220  |
| C | 4.517876  | 3.424311  | 0.625565  |
| C | 4.125880  | 3.778836  | 1.918947  |
| C | 3.314038  | 2.904734  | 2.650658  |
| C | 2.860384  | 1.713897  | 2.074512  |
| N | 4.611801  | 1.851171  | -1.194675 |
| N | 4.499462  | 5.018389  | 2.460138  |
| N | 2.012119  | 0.884590  | 2.824839  |
| H | -7.752205 | 1.153812  | 1.925052  |
| H | -7.623094 | -1.765674 | -1.238836 |
| H | -1.770224 | -4.495661 | 0.891968  |
| H | 0.234279  | -2.062265 | -2.043107 |
| H | 0.244736  | 2.747536  | 1.516782  |
| H | -2.727916 | 4.469539  | -1.087286 |

|   |           |           |           |
|---|-----------|-----------|-----------|
| H | 5.173036  | 4.082763  | 0.057135  |
| H | 3.039326  | 3.144209  | 3.676679  |
| H | 2.848197  | -1.799895 | -4.645758 |
| H | 1.250393  | 2.169403  | -4.189103 |
| H | 6.221185  | -2.960143 | 1.313575  |
| H | 2.373312  | -4.138068 | 2.852917  |
| H | 2.136023  | -0.116258 | 2.691053  |
| H | 1.979922  | 1.117484  | 3.811415  |
| H | 4.508801  | 5.046047  | 3.473759  |
| H | 5.356693  | 5.401108  | 2.076645  |
| H | 5.041197  | 2.619004  | -1.699165 |
| H | 3.965814  | 1.333621  | -1.791685 |
| H | 0.577146  | -1.610761 | 1.052527  |
| H | 0.472534  | -2.979844 | 2.016975  |
| H | 4.361800  | -5.479088 | 3.110011  |
| H | 5.860785  | -5.021546 | 2.506660  |
| H | 6.351307  | -1.008790 | 0.057639  |
| H | 5.050597  | -0.033074 | -0.407378 |
| H | 0.782228  | 2.914096  | -2.026089 |
| H | 0.995870  | 1.983982  | -0.646226 |
| H | 1.964052  | 1.276801  | -6.335549 |
| H | 2.594836  | -0.266754 | -6.511422 |
| H | 3.661351  | -2.871227 | -2.705759 |
| H | 3.243273  | -2.394492 | -1.141297 |
| H | -1.480445 | -0.359707 | 1.908178  |
| H | -4.578748 | 3.127522  | -1.674324 |
| H | -4.948936 | 1.646837  | -0.913719 |
| H | -0.721006 | 5.656718  | -0.350114 |
| H | 0.493668  | 4.900868  | 0.535744  |
| H | -9.664298 | -1.080937 | -0.166893 |
| H | -9.714360 | 0.066600  | 1.061699  |
| H | -5.533228 | -2.310319 | -2.149966 |
| H | -4.038454 | -1.876678 | -1.425066 |
| H | -5.703017 | 2.145726  | 2.553536  |
| H | -4.191699 | 1.566252  | 2.047181  |
| H | -4.281744 | -2.018578 | 1.588881  |
| H | -3.810401 | -3.629724 | 1.768604  |
| H | 0.000316  | -5.344481 | -0.668380 |
| H | 0.933796  | -4.242134 | -1.570085 |
| H | -1.665996 | 0.863503  | -1.420888 |
| H | -0.441266 | 0.106867  | -2.319651 |

**69. FLP<sub>7</sub>: Acid R = H. Base R = CN**

**E<sub>elec</sub>** = -2587.580995 a.u.; **H** = -2587.003743 a.u

|   |          |           |           |
|---|----------|-----------|-----------|
| C | 0.463107 | 2.382025  | 1.161509  |
| C | 1.671421 | 1.691833  | 0.884178  |
| C | 2.877957 | 2.336025  | 1.238969  |
| C | 2.870167 | 3.614051  | 1.816460  |
| C | 1.663367 | 4.272430  | 2.071514  |
| C | 0.452110 | 3.644933  | 1.755523  |
| P | 1.455217 | 0.154942  | -0.093572 |
| C | 3.125275 | -0.385792 | -0.627334 |
| C | 3.889389 | -1.468248 | -0.137565 |
| C | 5.073618 | -1.860378 | -0.776265 |
| C | 5.534037 | -1.171561 | -1.903262 |

|   |           |           |           |
|---|-----------|-----------|-----------|
| C | 4.808278  | -0.079724 | -2.394618 |
| C | 3.616123  | 0.293480  | -1.770554 |
| C | 3.545846  | -2.182276 | 1.052841  |
| C | 6.745764  | -1.575269 | -2.544736 |
| C | 2.906383  | 1.429119  | -2.277647 |
| C | 4.162307  | 1.724653  | 1.090727  |
| C | 1.666132  | 5.573667  | 2.662414  |
| C | -0.789345 | 1.742673  | 0.899596  |
| C | 0.816967  | -1.140890 | 1.034787  |
| C | 0.587783  | -1.051674 | 2.425368  |
| C | -0.096410 | -2.067338 | 3.107800  |
| C | -0.545515 | -3.201997 | 2.426552  |
| C | -0.300432 | -3.332469 | 1.054522  |
| C | 0.359208  | -2.309467 | 0.373050  |
| C | 1.086186  | 0.025313  | 3.222309  |
| C | -1.247515 | -4.229992 | 3.127845  |
| C | 0.632301  | -2.480101 | -1.021584 |
| C | -3.223791 | -3.840896 | -1.001751 |
| C | -3.522737 | -4.108658 | 0.336424  |
| C | -3.894159 | -3.062135 | 1.185878  |
| C | -3.990262 | -1.763689 | 0.689199  |
| C | -3.702646 | -1.462475 | -0.659672 |
| C | -3.301633 | -2.533959 | -1.485484 |
| B | -3.879091 | -0.005690 | -1.223250 |
| C | -5.026540 | 0.898438  | -0.659858 |
| C | -4.878178 | 2.298288  | -0.557663 |
| C | -5.892477 | 3.104443  | -0.045989 |
| C | -7.102991 | 2.532902  | 0.354072  |
| C | -7.284677 | 1.152239  | 0.253298  |
| C | -6.254062 | 0.349030  | -0.232701 |
| C | -2.952427 | 0.517232  | -2.369007 |
| C | -1.630057 | 0.046816  | -2.505306 |
| C | -0.777611 | 0.521151  | -3.497109 |
| C | -1.236690 | 1.476989  | -4.406080 |
| C | -2.547704 | 1.950139  | -4.312250 |
| C | -3.387638 | 1.482471  | -3.302746 |
| H | -3.939423 | 2.751298  | -0.866365 |
| H | -5.745534 | 4.178546  | 0.037381  |
| H | -7.900344 | 3.161029  | 0.743364  |
| H | -8.226482 | 0.703835  | 0.559532  |
| H | -6.404062 | -0.726109 | -0.299096 |
| H | -4.289964 | -0.957335 | 1.353860  |
| H | -4.118558 | -3.267973 | 2.229308  |
| H | -3.467265 | -5.124554 | 0.720124  |
| H | -2.937486 | -4.650540 | -1.668887 |
| H | -3.071670 | -2.339927 | -2.530300 |
| H | -1.264069 | -0.692428 | -1.800401 |
| H | 0.239206  | 0.145521  | -3.565031 |
| H | -0.574862 | 1.852018  | -5.182375 |
| H | -2.910791 | 2.687349  | -5.023983 |
| H | -4.405783 | 1.858727  | -3.239458 |
| H | 5.643673  | -2.691996 | -0.377235 |
| H | 5.163158  | 0.472467  | -3.257486 |
| H | -0.258846 | -1.974022 | 4.175804  |
| H | -0.636587 | -4.209831 | 0.516531  |

|   |           |           |           |
|---|-----------|-----------|-----------|
| H | 3.811387  | 4.082643  | 2.081769  |
| H | -0.492245 | 4.133069  | 1.968473  |
| N | 7.729098  | -1.903825 | -3.068863 |
| N | 3.331463  | -2.791193 | 2.019149  |
| N | 2.366831  | 2.377841  | -2.678804 |
| N | 0.900885  | -2.636559 | -2.142178 |
| N | 1.481813  | 0.866352  | 3.920132  |
| N | -1.824546 | -5.064692 | 3.693376  |
| N | -1.809668 | 1.205793  | 0.753072  |
| N | 1.666501  | 6.632872  | 3.139643  |
| N | 5.235391  | 1.285469  | 1.011668  |

**70. FLP<sub>8</sub>: Acid R = H. Base R = CF<sub>3</sub>**

**E<sub>elec</sub>** = -4791.904367 a.u.; **H** = -4791.259475 a.u

|   |           |           |           |
|---|-----------|-----------|-----------|
| C | 1.629180  | -0.781381 | 4.550372  |
| C | 2.421622  | -1.455993 | 3.637064  |
| C | 2.280628  | -1.240502 | 2.263323  |
| C | 1.309288  | -0.336060 | 1.759554  |
| C | 0.461165  | 0.281295  | 2.726911  |
| C | 0.642022  | 0.080113  | 4.091582  |
| P | 0.800496  | 0.006245  | 0.005824  |
| C | 1.368401  | -1.331837 | -1.150559 |
| C | 0.543829  | -2.496506 | -1.119413 |
| C | 0.765457  | -3.570889 | -1.974584 |
| C | 1.770180  | -3.512920 | -2.931476 |
| C | 2.543910  | -2.369941 | -3.036807 |
| C | 2.361803  | -1.293694 | -2.163144 |
| B | -4.887222 | -0.019067 | -0.086036 |
| C | -4.890857 | -1.523126 | 0.350011  |
| C | -4.261977 | -1.942128 | 1.542582  |
| C | -4.212840 | -3.285106 | 1.909487  |
| C | -4.823036 | -4.250363 | 1.105601  |
| C | -5.472345 | -3.864997 | -0.069366 |
| C | -5.491543 | -2.523127 | -0.444990 |
| C | -4.835340 | 0.356225  | -1.605468 |
| C | -5.422830 | 1.543389  | -2.093979 |
| C | -5.355304 | 1.891753  | -3.441598 |
| C | -4.670852 | 1.070312  | -4.340085 |
| C | -4.073206 | -0.107436 | -3.886109 |
| C | -4.168965 | -0.463020 | -2.542722 |
| C | -4.902326 | 1.109113  | 0.999993  |
| C | -5.558228 | 0.932337  | 2.237464  |
| C | -5.557525 | 1.926913  | 3.213734  |
| C | -4.872286 | 3.122951  | 2.989261  |
| C | -4.205410 | 3.323634  | 1.778690  |
| C | -4.235228 | 2.336632  | 0.796242  |
| C | 1.345889  | 1.690515  | -0.558353 |
| C | 2.305916  | 2.569583  | 0.009276  |
| C | 2.474103  | 3.867151  | -0.480559 |
| C | 1.722399  | 4.330835  | -1.547540 |
| C | 0.749606  | 3.511706  | -2.102888 |
| C | 0.540561  | 2.228545  | -1.605677 |
| H | -5.828887 | 2.805301  | -3.792558 |
| H | -3.533309 | -0.745854 | -4.581121 |



|   |           |           |           |
|---|-----------|-----------|-----------|
| H | -6.083559 | 1.769616  | 4.152124  |
| H | -3.663169 | 4.249637  | 1.603833  |
| H | -3.700284 | -3.581986 | 2.821216  |
| H | -5.955804 | -4.612458 | -0.693548 |
| H | 3.217047  | 4.513899  | -0.031996 |
| H | 0.137854  | 3.877948  | -2.917080 |
| H | 0.130870  | -4.445641 | -1.913115 |
| H | 3.306383  | -2.311560 | -3.802456 |
| H | 3.174410  | -2.146979 | 3.993549  |
| H | -0.002383 | 0.586145  | 4.798880  |
| H | -4.603531 | 1.346852  | -5.389350 |
| H | -3.695127 | -1.378505 | -2.199996 |
| H | -3.780398 | -1.200255 | 2.173525  |
| H | -5.991187 | -2.235254 | -1.367003 |
| H | -3.706543 | 2.500380  | -0.138473 |
| H | -6.086074 | 0.000531  | 2.426604  |
| H | -4.857381 | 3.894815  | 3.754745  |
| H | -4.792869 | -5.298323 | 1.393392  |
| H | -5.950528 | 2.194852  | -1.401408 |
| C | 1.906179  | 5.739914  | -2.055935 |
| C | -0.658179 | 1.496105  | -2.213223 |
| C | 3.186360  | 2.257949  | 1.213527  |
| C | 3.266687  | -0.106488 | -2.470016 |
| C | 2.011921  | -4.699115 | -3.832718 |
| C | -0.752804 | 1.138413  | 2.361796  |
| C | -0.689017 | -2.636296 | -0.223299 |
| C | 3.201233  | -2.110729 | 1.415993  |
| C | 1.779283  | -1.026674 | 6.031934  |
| F | 4.341568  | -0.476177 | -3.213844 |
| F | 2.604565  | 0.833198  | -3.206871 |
| F | 3.764226  | 0.512837  | -1.382348 |
| F | 2.708644  | -4.363652 | -4.945429 |
| F | 2.721175  | -5.667779 | -3.191762 |
| F | 0.845932  | -5.266972 | -4.235576 |
| F | -1.660806 | -1.769595 | -0.586512 |
| F | -1.226303 | -3.878776 | -0.305502 |
| F | -0.423490 | -2.434844 | 1.095947  |
| F | -1.173645 | 2.174226  | -3.268569 |
| F | -0.352274 | 0.256455  | -2.683945 |
| F | -1.658181 | 1.361372  | -1.313883 |
| F | 4.235873  | 3.115486  | 1.302176  |
| F | 2.486981  | 2.397826  | 2.377541  |
| F | 3.718532  | 1.020256  | 1.210335  |
| F | 1.655997  | 5.831646  | -3.385767 |
| F | 1.058609  | 6.604641  | -1.432315 |
| F | 3.165101  | 6.195977  | -1.842750 |
| F | 4.244353  | -2.590520 | 2.141387  |
| F | 2.536309  | -3.205283 | 0.943500  |
| F | 3.745274  | -1.482196 | 0.355867  |
| F | 1.587203  | 0.109726  | 6.748497  |
| F | 0.866243  | -1.933564 | 6.477630  |
| F | 3.005768  | -1.508443 | 6.347941  |
| F | -1.710905 | 0.400197  | 1.758369  |
| F | -1.322649 | 1.690128  | 3.461687  |
| F | -0.449880 | 2.180068  | 1.539719  |

**71. FLP<sub>9</sub>: Acid R = H. Base R = H****E<sub>elec</sub>** = -1756.997177 a.u.; **H** = -1756.419746 a.u

|   |           |           |           |
|---|-----------|-----------|-----------|
| B | -0.003502 | -0.001099 | -1.357344 |
| C | -0.017430 | 1.579317  | -1.736179 |
| C | -1.052668 | 2.151765  | -2.497869 |
| C | 1.006660  | 2.458255  | -1.320480 |
| C | -1.087981 | 3.515896  | -2.797796 |
| C | 0.978211  | 3.823271  | -1.604668 |
| C | -0.079084 | 4.363367  | -2.340496 |
| H | -1.908479 | 3.916714  | -3.388851 |
| H | 1.782369  | 4.465316  | -1.252202 |
| C | -1.365834 | -0.802606 | -1.736047 |
| C | -1.345502 | -1.980188 | -2.505756 |
| C | -2.638296 | -0.357891 | -1.315215 |
| C | -2.509822 | -2.690633 | -2.808548 |
| C | -3.806811 | -1.062925 | -1.602187 |
| C | -3.747368 | -2.243578 | -2.346175 |
| H | -2.447768 | -3.597568 | -3.405909 |
| H | -4.764281 | -0.689606 | -1.245799 |
| C | 1.371475  | -0.780138 | -1.737263 |
| C | 1.618722  | -2.107373 | -1.323285 |
| C | 2.385416  | -0.170693 | -2.498837 |
| C | 2.813914  | -2.766830 | -1.608727 |
| C | 3.583298  | -0.823719 | -2.800071 |
| C | 3.811010  | -2.121989 | -2.344272 |
| H | 2.966297  | -3.784991 | -1.257653 |
| H | 4.341100  | -0.314035 | -3.390986 |
| P | 0.000775  | -0.000037 | 0.754903  |
| C | -1.378340 | 0.947993  | 1.493410  |
| C | 1.515188  | 0.722291  | 1.483362  |
| C | -0.127492 | -1.669173 | 1.492068  |
| C | -2.245531 | 0.373333  | 2.433068  |
| C | -1.595714 | 2.276155  | 1.083609  |
| C | 2.770953  | 0.236029  | 1.076141  |
| C | 1.458030  | 1.772425  | 2.410250  |
| C | 0.804217  | -2.132355 | 2.431489  |
| C | -1.169055 | -2.521663 | 1.082826  |
| C | -3.317360 | 1.105830  | 2.943628  |
| C | -2.665993 | 3.002546  | 1.600819  |
| C | 3.938942  | 0.801579  | 1.582657  |
| C | 2.632065  | 2.336069  | 2.910203  |
| C | 0.706508  | -3.426882 | 2.942018  |
| C | -1.262202 | -3.811866 | 1.599882  |
| C | -3.532735 | 2.419401  | 2.527249  |
| H | -3.983914 | 0.645420  | 3.667841  |
| H | -2.823791 | 4.025522  | 1.270736  |
| C | 3.874203  | 1.855780  | 2.495914  |
| H | 4.901259  | 0.418697  | 1.254528  |
| H | 2.572004  | 3.152721  | 3.624507  |
| C | -0.323189 | -4.270575 | 2.525879  |
| H | 1.438781  | -3.773643 | 3.666093  |
| H | -2.069092 | -4.460368 | 1.270181  |
| H | -0.108448 | 5.427038  | -2.563459 |
| H | 1.845526  | 2.067552  | -0.751216 |

|   |           |           |           |
|---|-----------|-----------|-----------|
| H | 0.860099  | -2.638292 | -0.754899 |
| H | 2.236984  | 0.840947  | -2.865845 |
| H | -2.718526 | 0.560457  | -0.740207 |
| H | -0.395651 | -2.353555 | -2.877978 |
| H | -4.654335 | -2.799066 | -2.571597 |
| H | 4.745833  | -2.629739 | -2.568468 |
| H | -1.853468 | 1.516431  | -2.865641 |
| H | -4.370695 | 2.986811  | 2.923102  |
| H | -0.935307 | 2.737755  | 0.357576  |
| H | -2.089802 | -0.648538 | 2.762955  |
| H | 0.497786  | 2.156242  | 2.738641  |
| H | 4.787507  | 2.299121  | 2.883403  |
| H | -1.899537 | -2.180403 | 0.357319  |
| H | 2.835226  | -0.576217 | 0.360240  |
| H | 1.610841  | -1.485988 | 2.761455  |
| H | -0.395059 | -5.280025 | 2.921706  |

**72. FLP<sub>10</sub>: Acid R = H. Base R = OCH<sub>3</sub>**

**E<sub>elec</sub>** = -2788.284807 a.u.; **H** = -2787.398279 a.u

|   |           |           |           |
|---|-----------|-----------|-----------|
| B | -0.475775 | -0.253662 | 1.976514  |
| C | -2.072581 | 0.071074  | 2.141239  |
| C | -2.547192 | 1.048991  | 3.037190  |
| C | -3.053894 | -0.767555 | 1.572626  |
| C | -3.906971 | 1.204958  | 3.321445  |
| C | -4.414893 | -0.606328 | 1.826231  |
| C | -4.853767 | 0.386377  | 2.705468  |
| H | -4.223888 | 1.966742  | 4.031063  |
| H | -5.132484 | -1.270593 | 1.349142  |
| C | 0.461729  | 0.794370  | 2.767265  |
| C | 1.398947  | 0.428661  | 3.748207  |
| C | 0.324073  | 2.178074  | 2.529809  |
| C | 2.127110  | 1.374361  | 4.474433  |
| C | 1.059205  | 3.134012  | 3.229717  |
| C | 1.957946  | 2.736537  | 4.223002  |
| H | 2.831120  | 1.045785  | 5.236594  |
| H | 0.925794  | 4.190313  | 3.005507  |
| C | -0.367204 | -1.833191 | 2.325925  |
| C | -0.399269 | -2.882775 | 1.390217  |
| C | -0.428342 | -2.216281 | 3.681532  |
| C | -0.441437 | -4.224464 | 1.771959  |
| C | -0.462189 | -3.554865 | 4.078228  |
| C | -0.461715 | -4.572756 | 3.123569  |
| H | -0.457728 | -5.000208 | 1.008255  |
| H | -0.502957 | -3.801551 | 5.137201  |
| P | 0.133034  | 0.018197  | -0.190069 |
| C | 0.838742  | 1.640619  | -0.729552 |
| C | -1.436624 | -0.235457 | -1.098666 |
| C | 1.416247  | -1.094704 | -0.894394 |
| C | 2.046331  | 1.999746  | -0.095175 |
| C | 0.375605  | 2.532668  | -1.729147 |
| C | -1.831438 | -1.398471 | -1.795180 |
| C | -2.424695 | 0.751054  | -0.914225 |
| C | 1.589843  | -1.154036 | -2.298355 |
| C | 2.304686  | -1.858244 | -0.115814 |
| C | 2.685486  | 3.228903  | -0.296499 |

|   |           |           |           |
|---|-----------|-----------|-----------|
| O | 2.560773  | 1.041654  | 0.714169  |
| C | 0.987500  | 3.770436  | -1.938825 |
| O | -0.661286 | 2.126153  | -2.513479 |
| C | -3.117586 | -1.540674 | -2.316994 |
| O | -0.902262 | -2.393614 | -1.907562 |
| C | -3.714946 | 0.641327  | -1.440943 |
| O | -2.035041 | 1.826457  | -0.175718 |
| C | 2.505119  | -2.010902 | -2.901959 |
| O | 0.788789  | -0.319491 | -3.012199 |
| C | 3.233973  | -2.734935 | -0.701568 |
| O | 2.250860  | -1.694355 | 1.230852  |
| C | 2.121905  | 4.122407  | -1.204453 |
| H | 3.587249  | 3.466724  | 0.249450  |
| C | 3.778094  | 1.289324  | 1.419765  |
| H | 0.625023  | 4.465289  | -2.685632 |
| C | -1.285318 | 3.072721  | -3.377593 |
| C | -4.051389 | -0.517995 | -2.136616 |
| H | -3.426922 | -2.434875 | -2.842684 |
| C | -1.280766 | -3.632630 | -2.507652 |
| H | -4.443663 | 1.417346  | -1.256657 |
| C | -3.017746 | 2.792985  | 0.207136  |
| C | 3.313224  | -2.813084 | -2.090338 |
| H | 2.617520  | -2.073636 | -3.977041 |
| C | 0.778294  | -0.414850 | -4.434139 |
| H | 3.893019  | -3.315788 | -0.071872 |
| C | 2.836904  | -2.697795 | 2.068483  |
| O | 2.633208  | 5.365105  | -1.472370 |
| H | 4.605802  | 1.447348  | 0.715798  |
| H | 3.669791  | 2.145615  | 2.093078  |
| H | 3.947786  | 0.386949  | 2.005218  |
| H | -1.616276 | 3.960798  | -2.823750 |
| H | -0.613668 | 3.378096  | -4.191197 |
| H | -2.151022 | 2.550710  | -3.789329 |
| O | -5.292194 | -0.755285 | -2.667616 |
| H | -2.099331 | -4.106395 | -1.951484 |
| H | -1.575005 | -3.494078 | -3.556089 |
| H | -0.385484 | -4.253836 | -2.456292 |
| H | -2.494710 | 3.487237  | 0.865072  |
| H | -3.396677 | 3.329710  | -0.672830 |
| H | -3.836163 | 2.315871  | 0.755448  |
| O | 4.178329  | -3.637989 | -2.760180 |
| H | 0.024338  | 0.302873  | -4.759033 |
| H | 1.754765  | -0.147552 | -4.858369 |
| H | 0.497288  | -1.425444 | -4.757488 |
| H | 3.933237  | -2.637830 | 2.045699  |
| H | 2.470990  | -2.480652 | 3.071381  |
| H | 2.499703  | -3.696926 | 1.772950  |
| C | 3.799372  | 5.767759  | -0.748003 |
| C | -6.312397 | 0.215812  | -2.415487 |
| C | 5.029688  | -4.480647 | -1.978045 |
| H | 4.648595  | 5.106731  | -0.965456 |
| H | 4.022783  | 6.777947  | -1.094018 |
| H | 3.608653  | 5.779575  | 0.332940  |
| H | -6.058537 | 1.184700  | -2.865862 |
| H | -7.213885 | -0.180704 | -2.884688 |

|   |           |           |           |
|---|-----------|-----------|-----------|
| H | -6.477995 | 0.341642  | -1.337810 |
| H | 5.610539  | -5.057179 | -2.699366 |
| H | 5.706273  | -3.886584 | -1.349859 |
| H | 4.442353  | -5.160203 | -1.346983 |
| H | -5.912921 | 0.504563  | 2.922716  |
| H | -2.744349 | -1.579618 | 0.920851  |
| H | -0.375485 | -2.659060 | 0.327559  |
| H | -0.476089 | -1.446129 | 4.448052  |
| H | -0.370232 | 2.507189  | 1.760341  |
| H | 1.560670  | -0.624237 | 3.959339  |
| H | 2.521227  | 3.476606  | 4.786761  |
| H | -0.493153 | -5.616348 | 3.427104  |
| H | -1.837920 | 1.696106  | 3.544603  |

**73. FLP<sub>11</sub>: Acid R = H. Base R = NH<sub>2</sub>**

**E<sub>elec</sub>** = -2255.494527 a.u.; **H** = -2254.758917 a.u

|   |           |           |           |
|---|-----------|-----------|-----------|
| C | 1.355980  | -2.000857 | 2.132168  |
| C | 2.284381  | -1.255344 | 1.338593  |
| C | 3.654064  | -1.262530 | 1.739329  |
| C | 4.049288  | -1.929364 | 2.907766  |
| C | 3.113654  | -2.616496 | 3.688011  |
| C | 1.773376  | -2.666942 | 3.290610  |
| P | 1.546966  | -0.129068 | 0.115845  |
| C | 2.364927  | 1.487291  | 0.368731  |
| C | 3.369628  | 2.079650  | -0.438814 |
| C | 3.762058  | 3.408577  | -0.247444 |
| C | 3.188295  | 4.180072  | 0.769235  |
| C | 2.228291  | 3.607922  | 1.609336  |
| C | 1.823133  | 2.280021  | 1.422593  |
| N | 4.059370  | 1.303482  | -1.380040 |
| N | 3.531323  | 5.531125  | 0.907705  |
| N | 0.922525  | 1.726285  | 2.327870  |
| N | 4.633773  | -0.701520 | 0.943726  |
| N | 3.509553  | -3.214379 | 4.888436  |
| N | 0.040331  | -2.115907 | 1.733393  |
| C | 1.806401  | -0.653735 | -1.622242 |
| C | 2.347519  | -1.902461 | -2.049664 |
| C | 2.329944  | -2.258310 | -3.409075 |
| C | 1.757359  | -1.421371 | -4.369309 |
| C | 1.183992  | -0.209893 | -3.969705 |
| C | 1.195744  | 0.165972  | -2.620864 |
| N | 2.836536  | -2.831551 | -1.152355 |
| N | 1.683422  | -1.828046 | -5.706822 |
| N | 0.665451  | 1.404749  | -2.281063 |
| C | -1.247833 | -2.191028 | -1.787463 |
| C | -1.458123 | -3.409680 | -1.141203 |
| C | -2.424422 | -3.509337 | -0.136758 |
| C | -3.186785 | -2.396098 | 0.207986  |
| C | -2.988066 | -1.141497 | -0.414218 |
| C | -1.989037 | -1.071743 | -1.410788 |
| B | -3.863186 | 0.100925  | -0.047495 |
| C | -5.339692 | -0.099323 | 0.440296  |
| C | -5.924796 | 0.770334  | 1.386156  |
| C | -7.231766 | 0.589600  | 1.835037  |
| C | -8.006326 | -0.453722 | 1.322824  |

|   |           |           |           |
|---|-----------|-----------|-----------|
| C | -7.461656 | -1.320301 | 0.372505  |
| C | -6.143761 | -1.151855 | -0.048515 |
| C | -3.287838 | 1.553358  | -0.171312 |
| C | -1.929077 | 1.833598  | 0.087553  |
| C | -1.418817 | 3.129517  | 0.003712  |
| C | -2.254346 | 4.181345  | -0.379454 |
| C | -3.601177 | 3.933844  | -0.656247 |
| C | -4.110267 | 2.641722  | -0.536322 |
| H | -5.333713 | 1.592381  | 1.783261  |
| H | -7.650937 | 1.263876  | 2.577827  |
| H | -9.030334 | -0.589958 | 1.661719  |
| H | -8.063991 | -2.128896 | -0.034205 |
| H | -5.727298 | -1.836064 | -0.783908 |
| H | -3.943264 | -2.486340 | 0.984375  |
| H | -2.578433 | -4.455412 | 0.376367  |
| H | -0.856998 | -4.274055 | -1.409525 |
| H | -0.496255 | -2.109061 | -2.566733 |
| H | -1.803052 | -0.124422 | -1.909444 |
| H | -1.261246 | 1.019373  | 0.363222  |
| H | -0.370914 | 3.321178  | 0.223848  |
| H | -1.855722 | 5.189613  | -0.460438 |
| H | -4.253220 | 4.749834  | -0.958269 |
| H | -5.162841 | 2.462326  | -0.743142 |
| H | 4.520947  | 3.841926  | -0.896791 |
| H | 1.803180  | 4.186653  | 2.427254  |
| H | 2.735300  | -3.224419 | -3.704155 |
| H | 0.724930  | 0.449069  | -4.703948 |
| H | 5.097908  | -1.920286 | 3.199790  |
| H | 1.049919  | -3.227774 | 3.878931  |
| H | -0.032537 | 1.771935  | -2.916079 |
| H | 0.414110  | 1.539456  | -1.306872 |
| H | 1.595352  | -1.072685 | -6.376589 |
| H | 2.392117  | -2.495790 | -5.987600 |
| H | 3.514985  | -3.489212 | -1.510636 |
| H | 2.995692  | -2.524874 | -0.198310 |
| H | 0.276549  | 2.382517  | 2.751206  |
| H | 0.464542  | 0.873489  | 2.009140  |
| H | 4.583787  | 1.848294  | -2.055534 |
| H | 3.489714  | 0.586469  | -1.832772 |
| H | 3.383932  | 5.910481  | 1.836123  |
| H | 4.449007  | 5.772200  | 0.550898  |
| H | -0.648520 | -2.376405 | 2.424366  |
| H | -0.287715 | -1.493910 | 0.999343  |
| H | 2.915579  | -3.972158 | 5.204229  |
| H | 4.491528  | -3.459054 | 4.940228  |
| H | 5.505591  | -0.475765 | 1.403746  |
| H | 4.382283  | -0.038423 | 0.214652  |

**74. FLP<sub>12</sub>: Acid R = CN. Base R = CN**

**E<sub>elec</sub>** = -3418.189091 a.u.; **H** = -3417.611595 a.u

|   |          |          |           |
|---|----------|----------|-----------|
| C | 4.562162 | 2.667571 | 0.293618  |
| C | 3.652310 | 1.645458 | -0.073754 |
| C | 2.343550 | 2.053319 | -0.431503 |
| C | 1.958792 | 3.396887 | -0.428217 |
| C | 2.879282 | 4.376251 | -0.033163 |

|   |           |           |           |
|---|-----------|-----------|-----------|
| C | 4.181740  | 4.012264  | 0.332403  |
| B | 4.064820  | 0.132389  | -0.065617 |
| C | 5.423107  | -0.321298 | -0.705708 |
| C | 5.855567  | 0.179316  | -1.959346 |
| C | 7.054952  | -0.234775 | -2.545982 |
| C | 7.881320  | -1.141705 | -1.870407 |
| C | 7.497081  | -1.643700 | -0.620485 |
| C | 6.277986  | -1.250309 | -0.061106 |
| C | 5.042546  | 1.108477  | -2.685726 |
| N | 4.395556  | 1.868606  | -3.280831 |
| C | 9.117801  | -1.555067 | -2.456747 |
| N | 10.122539 | -1.891221 | -2.933348 |
| C | 5.925629  | -1.788121 | 1.218933  |
| N | 5.645008  | -2.235939 | 2.253979  |
| C | 1.383775  | 1.077624  | -0.851813 |
| N | 0.598877  | 0.289480  | -1.187828 |
| C | 2.488130  | 5.751071  | -0.003271 |
| N | 2.171701  | 6.868597  | 0.021168  |
| C | 5.900675  | 2.332779  | 0.677941  |
| N | 6.990010  | 2.064229  | 0.981228  |
| C | 3.115390  | -0.926522 | 0.599769  |
| C | 2.816718  | -2.160484 | -0.030993 |
| C | 1.942123  | -3.090067 | 0.537637  |
| C | 1.390136  | -2.835956 | 1.798637  |
| C | 1.706619  | -1.654660 | 2.478160  |
| C | 2.519673  | -0.697418 | 1.864130  |
| C | 0.450695  | -3.742823 | 2.379026  |
| N | -0.354301 | -4.432660 | 2.854266  |
| C | 3.368240  | -2.458288 | -1.318676 |
| N | 3.822988  | -2.708185 | -2.358496 |
| C | 2.726511  | 0.531145  | 2.570058  |
| N | 2.831141  | 1.530515  | 3.154507  |
| C | -1.975519 | -2.643603 | -1.143080 |
| C | -3.352619 | -2.529400 | -1.515127 |
| C | -4.099504 | -1.383512 | -1.139567 |
| C | -5.473907 | -1.375167 | -1.468831 |
| C | -6.058652 | -2.449228 | -2.155477 |
| C | -5.295597 | -3.563945 | -2.515336 |
| C | -3.937403 | -3.609324 | -2.179526 |
| P | -3.093416 | -0.000230 | -0.472447 |
| C | -2.685748 | -0.380261 | 1.274418  |
| C | -3.043949 | -1.523544 | 2.024284  |
| C | -2.469216 | -1.775362 | 3.278000  |
| C | -1.554656 | -0.873630 | 3.830640  |
| C | -1.214565 | 0.291273  | 3.130587  |
| C | -1.758337 | 0.518014  | 1.865276  |
| C | -6.363741 | -0.320978 | -1.091524 |
| C | -5.901245 | -4.654729 | -3.212234 |
| C | -4.043123 | -2.449124 | 1.589599  |
| C | -0.940064 | -1.146835 | 5.090986  |
| C | -1.395641 | 1.723280  | 1.184539  |
| C | -4.180314 | 1.478064  | -0.434667 |
| C | -4.790856 | 2.087105  | 0.684494  |
| C | -5.451547 | 3.316579  | 0.563011  |
| C | -5.538471 | 3.955386  | -0.678691 |

|   |           |           |           |
|---|-----------|-----------|-----------|
| C | -4.965323 | 3.359916  | -1.808950 |
| C | -4.285822 | 2.146469  | -1.679839 |
| C | -4.830015 | 1.467091  | 1.972183  |
| C | -6.220799 | 5.205879  | -0.794663 |
| C | -3.729175 | 1.540652  | -2.851911 |
| H | 7.345571  | 0.148580  | -3.517678 |
| H | 8.139693  | -2.337785 | -0.090481 |
| H | 1.680716  | -3.992099 | -0.001149 |
| H | 1.312608  | -1.474322 | 3.471474  |
| H | 0.949004  | 3.672806  | -0.708126 |
| H | 4.892883  | 4.769445  | 0.643296  |
| H | -5.916376 | 3.760594  | 1.436240  |
| H | -5.041272 | 3.837021  | -2.779558 |
| H | -2.742534 | -2.674041 | 3.818972  |
| H | -0.520060 | 1.007533  | 3.556958  |
| H | -7.116681 | -2.415876 | -2.390825 |
| H | -3.337707 | -4.476376 | -2.432260 |
| N | -0.398848 | -1.369944 | 6.094741  |
| N | -4.863046 | -3.217993 | 1.295140  |
| N | -1.117529 | 2.725582  | 0.665979  |
| N | -4.903502 | 1.002663  | 3.034959  |
| N | -6.773585 | 6.223137  | -0.890097 |
| N | -3.321554 | 1.036251  | -3.817060 |
| N | -0.877056 | -2.805786 | -0.802049 |
| N | -7.149398 | 0.488020  | -0.810852 |
| N | -6.391704 | -5.540523 | -3.781713 |

**75. FLP<sub>13</sub>: Acid R = CF<sub>3</sub>. Base R = CF<sub>3</sub>**

**E<sub>elec</sub>** = -7826.857711 a.u.; **H** = -7826.144584 a.u

|   |           |           |           |
|---|-----------|-----------|-----------|
| B | -4.122413 | 0.261184  | -0.351725 |
| C | -4.526345 | -0.992023 | -1.268293 |
| C | -5.307030 | -0.846401 | -2.452872 |
| C | -4.138592 | -2.324932 | -0.966656 |
| C | -5.669169 | -1.935143 | -3.242708 |
| C | -4.508292 | -3.411943 | -1.761068 |
| C | -5.274268 | -3.220596 | -2.898209 |
| H | -6.263633 | -1.779165 | -4.134520 |
| H | -4.180946 | -4.409425 | -1.493061 |
| C | -3.498496 | 1.567757  | -1.037320 |
| C | -3.948701 | 2.881233  | -0.731076 |
| C | -2.434933 | 1.498685  | -1.984453 |
| C | -3.364678 | 4.018674  | -1.288106 |
| C | -1.855375 | 2.641062  | -2.534608 |
| C | -2.310880 | 3.902126  | -2.180644 |
| H | -3.744107 | 4.999770  | -1.026305 |
| H | -1.037164 | 2.546340  | -3.236205 |
| C | -4.330686 | 0.203989  | 1.241656  |
| C | -3.350725 | 0.675496  | 2.165245  |
| C | -5.507398 | -0.333387 | 1.838947  |
| C | -3.536300 | 0.610126  | 3.545253  |
| C | -5.672244 | -0.416054 | 3.222002  |
| C | -4.689156 | 0.054225  | 4.077415  |
| H | -2.760932 | 0.967539  | 4.210539  |
| H | -6.578988 | -0.843777 | 3.631378  |
| C | -5.713069 | -4.395374 | -3.739801 |



|   |           |           |           |
|---|-----------|-----------|-----------|
| C | -3.286537 | -2.748079 | 0.224712  |
| C | -5.819897 | 0.487110  | -2.993749 |
| C | -6.719145 | -0.848905 | 1.063487  |
| C | -4.884424 | 0.001691  | 5.574062  |
| C | -1.992099 | 1.250287  | 1.767213  |
| C | -5.093893 | 3.228075  | 0.217237  |
| C | -1.816476 | 0.196408  | -2.492040 |
| C | -1.649413 | 5.145306  | -2.726112 |
| F | -5.444276 | 1.152714  | 6.037028  |
| F | -5.701648 | -1.014956 | 5.941701  |
| F | -3.708225 | -0.158751 | 6.229308  |
| F | -2.045301 | 2.576020  | 1.478448  |
| F | -1.087821 | 1.128993  | 2.778698  |
| F | -1.441299 | 0.629715  | 0.700851  |
| F | -6.948167 | -0.185201 | -0.090933 |
| F | -7.857203 | -0.728576 | 1.796491  |
| F | -6.607314 | -2.168525 | 0.751890  |
| F | -5.977194 | 2.230546  | 0.431545  |
| F | -4.629919 | 3.613257  | 1.437865  |
| F | -5.814577 | 4.275116  | -0.266544 |
| F | -0.782390 | 5.676750  | -1.819884 |
| F | -2.558815 | 6.111076  | -3.012541 |
| F | -0.944770 | 4.897305  | -3.855306 |
| F | -2.551484 | -0.363780 | -3.491376 |
| F | -0.579152 | 0.398293  | -3.002657 |
| F | -1.680754 | -0.747187 | -1.529157 |
| F | -5.759598 | -4.078480 | -5.057927 |
| F | -6.959351 | -4.812569 | -3.387100 |
| F | -4.882670 | -5.457259 | -3.602072 |
| F | -6.144930 | 1.380303  | -2.032824 |
| F | -4.908291 | 1.090546  | -3.803690 |
| F | -6.940483 | 0.317079  | -3.742626 |
| F | -2.436260 | -3.754632 | -0.124983 |
| F | -2.509955 | -1.770077 | 0.740050  |
| F | -4.049113 | -3.225897 | 1.242226  |
| P | 3.682130  | -0.224189 | -0.270380 |
| C | 5.162720  | -1.340934 | -0.405735 |
| C | 2.458220  | -0.881342 | 0.965410  |
| C | 4.177196  | 1.533029  | 0.084517  |
| C | 5.816172  | -1.262281 | -1.672517 |
| C | 5.611229  | -2.366907 | 0.467007  |
| C | 2.113933  | -0.394959 | 2.256159  |
| C | 1.667361  | -1.956627 | 0.466588  |
| C | 5.409091  | 2.052033  | 0.562343  |
| C | 3.228494  | 2.493425  | -0.375899 |
| C | 6.885629  | -2.091064 | -1.996903 |
| C | 6.663902  | -3.213067 | 0.105709  |
| C | 1.132334  | -1.023461 | 3.020127  |
| C | 0.701827  | -2.582300 | 1.254968  |
| C | 5.634554  | 3.429738  | 0.627445  |
| C | 3.458398  | 3.862005  | -0.271957 |
| C | 7.314507  | -3.066607 | -1.107288 |
| H | 7.367625  | -1.994150 | -2.961021 |
| H | 6.979647  | -3.991324 | 0.788271  |
| C | 0.451736  | -2.132986 | 2.540859  |

|   |           |           |           |
|---|-----------|-----------|-----------|
| H | 0.900493  | -0.642144 | 4.006185  |
| H | 0.134494  | -3.410915 | 0.854250  |
| C | 4.659972  | 4.333598  | 0.238037  |
| H | 6.584849  | 3.796882  | 0.992790  |
| H | 2.707689  | 4.561692  | -0.616213 |
| C | -0.564371 | -2.804890 | 3.431090  |
| C | 2.699665  | 0.852601  | 2.905227  |
| C | 1.767492  | -2.486274 | -0.965903 |
| C | 4.993937  | -2.723549 | 1.814491  |
| C | 8.493817  | -3.940480 | -1.459304 |
| C | 5.367973  | -0.330682 | -2.800612 |
| C | 6.618382  | 1.219940  | 0.971450  |
| C | 4.891129  | 5.818334  | 0.382510  |
| C | 1.931294  | 2.116702  | -1.088904 |
| F | 9.669707  | -3.321828 | -1.163943 |
| F | 8.523928  | -4.233472 | -2.784002 |
| F | 8.479429  | -5.113665 | -0.780665 |
| F | 5.284285  | 0.972759  | -2.419123 |
| F | 6.240493  | -0.352192 | -3.840718 |
| F | 4.164889  | -0.691037 | -3.303120 |
| F | 5.854540  | -3.441128 | 2.582584  |
| F | 4.626481  | -1.665347 | 2.561441  |
| F | 3.890091  | -3.510282 | 1.650712  |
| F | 3.014936  | -2.934154 | -1.282363 |
| F | 0.936284  | -3.540560 | -1.165723 |
| F | 1.424217  | -1.551680 | -1.879353 |
| F | -1.550152 | -1.939450 | 3.805235  |
| F | -1.160800 | -3.860925 | 2.834105  |
| F | 0.009011  | -3.254289 | 4.578816  |
| F | 2.370068  | 0.941005  | 4.218901  |
| F | 4.046030  | 0.922824  | 2.853919  |
| F | 2.210504  | 1.982462  | 2.318350  |
| F | 4.417023  | 6.275727  | 1.573590  |
| F | 6.208725  | 6.134325  | 0.331488  |
| F | 4.262375  | 6.523115  | -0.590876 |
| F | 2.168170  | 1.604920  | -2.319100 |
| F | 1.129855  | 3.201010  | -1.274405 |
| F | 1.177057  | 1.218894  | -0.403713 |
| F | 7.304978  | 0.787176  | -0.126133 |
| F | 7.501939  | 1.946296  | 1.703571  |
| F | 6.322546  | 0.136690  | 1.714896  |

**76. FLP<sub>14</sub>: Acid R = CN. Base R = H**

**E<sub>elec</sub>** = 2587.589330 a.u.; **H** = -2587.011871 a.u

|   |          |           |           |
|---|----------|-----------|-----------|
| C | 3.291661 | 2.545941  | 0.304860  |
| C | 2.327386 | 1.680767  | -0.259344 |
| C | 1.385787 | 2.251923  | -1.144164 |
| C | 1.368413 | 3.621668  | -1.419380 |
| C | 2.302203 | 4.460657  | -0.796019 |
| C | 3.272669 | 3.922289  | 0.059729  |
| B | 2.289972 | 0.146624  | 0.089198  |
| C | 3.560720 | -0.740387 | -0.179055 |
| C | 4.336839 | -0.599399 | -1.357721 |
| C | 5.455682 | -1.400120 | -1.610313 |
| C | 5.861566 | -2.346492 | -0.661979 |

|   |           |           |           |
|---|-----------|-----------|-----------|
| C | 5.141817  | -2.492804 | 0.530069  |
| C | 4.003489  | -1.712538 | 0.755749  |
| C | 3.984907  | 0.358720  | -2.362774 |
| N | 3.738589  | 1.133776  | -3.192755 |
| C | 7.012773  | -3.157760 | -0.907372 |
| N | 7.948138  | -3.817254 | -1.106977 |
| C | 3.322806  | -1.910052 | 2.001263  |
| N | 2.799031  | -2.103038 | 3.020467  |
| C | 0.521071  | 1.368088  | -1.860280 |
| N | -0.114091 | 0.607375  | -2.466675 |
| C | 2.275900  | 5.867918  | -1.048231 |
| N | 2.251150  | 7.011676  | -1.250588 |
| C | 4.293511  | 2.002367  | 1.171502  |
| N | 5.108923  | 1.529254  | 1.851073  |
| C | 1.037928  | -0.484517 | 0.783953  |
| C | 0.513132  | -1.733995 | 0.370777  |
| C | -0.554964 | -2.343068 | 1.033892  |
| C | -1.096002 | -1.733642 | 2.172089  |
| C | -0.594101 | -0.507891 | 2.621192  |
| C | 0.437442  | 0.118420  | 1.916531  |
| C | -2.181545 | -2.351277 | 2.867401  |
| N | -3.069506 | -2.842960 | 3.432235  |
| C | 1.078316  | -2.396275 | -0.766089 |
| N | 1.561172  | -2.936067 | -1.674985 |
| C | 0.924311  | 1.365502  | 2.423127  |
| N | 1.310434  | 2.376428  | 2.846372  |
| P | -3.276289 | 0.296006  | -1.065198 |
| C | -3.079859 | 0.931482  | 0.662476  |
| C | -3.796418 | 0.483835  | 1.784287  |
| C | -3.640708 | 1.102879  | 3.023850  |
| C | -2.780891 | 2.197046  | 3.161007  |
| C | -2.071984 | 2.662702  | 2.053870  |
| C | -2.217847 | 2.027588  | 0.818113  |
| C | -3.067553 | -1.541596 | -0.985995 |
| C | -2.139266 | -2.099472 | -1.879522 |
| C | -1.962010 | -3.484049 | -1.954835 |
| C | -2.703690 | -4.328809 | -1.128577 |
| C | -3.632178 | -3.785599 | -0.234579 |
| C | -3.822133 | -2.405981 | -0.175099 |
| C | -5.111386 | 0.403954  | -1.235639 |
| C | -5.828000 | 1.472958  | -0.672719 |
| C | -7.195189 | 1.616801  | -0.907300 |
| C | -7.872321 | 0.701226  | -1.713949 |
| C | -7.168555 | -0.358372 | -2.288490 |
| C | -5.801636 | -0.504314 | -2.055937 |
| H | -5.318697 | 2.192900  | -0.037655 |
| H | -8.938202 | 0.812040  | -1.892885 |
| H | -5.270172 | -1.337716 | -2.507731 |
| H | -4.578528 | -2.008464 | 0.492824  |
| H | -2.565927 | -5.405461 | -1.182686 |
| H | -1.553726 | -1.441215 | -2.514542 |
| H | -4.496890 | -0.338635 | 1.692601  |
| H | -2.668836 | 2.686331  | 4.124706  |
| H | -1.671665 | 2.393801  | -0.047820 |
| H | 6.008821  | -1.282544 | -2.535456 |

|   |           |           |           |
|---|-----------|-----------|-----------|
| H | 5.462384  | -3.211455 | 1.275998  |
| H | -0.965350 | -3.276064 | 0.665014  |
| H | -1.019037 | -0.031047 | 3.495598  |
| H | 0.646658  | 4.029232  | -2.118497 |
| H | 4.004257  | 4.569119  | 0.530670  |
| H | -7.732338 | 2.445970  | -0.453945 |
| H | -7.684755 | -1.078066 | -2.918639 |
| H | -4.198533 | 0.735326  | 3.881040  |
| H | -1.402737 | 3.511966  | 2.153002  |
| H | -4.214066 | -4.436002 | 0.412621  |
| H | -1.237612 | -3.895504 | -2.651633 |

**77. FLP<sub>15</sub>: Acid R = CF<sub>3</sub>. Base R = H**

**E<sub>elec</sub>** = -4791.929719 a.u.; **H** = -4791.284826 a.u

|   |           |           |           |
|---|-----------|-----------|-----------|
| B | -1.601455 | -0.095905 | -0.330263 |
| C | -2.589765 | -1.258261 | 0.171114  |
| C | -2.890273 | -2.407708 | -0.609279 |
| C | -3.229764 | -1.208814 | 1.443374  |
| C | -3.740336 | -3.416923 | -0.152708 |
| C | -4.075070 | -2.220900 | 1.892528  |
| C | -4.329582 | -3.329322 | 1.097228  |
| H | -3.938228 | -4.276890 | -0.781209 |
| H | -4.528776 | -2.149072 | 2.873301  |
| C | -0.179819 | -0.518164 | -0.950839 |
| C | 0.338055  | 0.045047  | -2.155077 |
| C | 0.616122  | -1.557768 | -0.390195 |
| C | 1.489989  | -0.440731 | -2.770321 |
| C | 1.776071  | -2.031451 | -1.007668 |
| C | 2.198627  | -1.493831 | -2.212002 |
| H | 1.842966  | 0.011177  | -3.687847 |
| H | 2.355315  | -2.813833 | -0.535560 |
| C | -2.112327 | 1.426647  | -0.219296 |
| C | -1.352586 | 2.465015  | 0.377214  |
| C | -3.398796 | 1.831534  | -0.691645 |
| C | -1.814784 | 3.779811  | 0.478670  |
| C | -3.853297 | 3.143771  | -0.590031 |
| C | -3.061997 | 4.125221  | -0.007246 |
| H | -1.190322 | 4.527588  | 0.954740  |
| H | -4.835490 | 3.402839  | -0.965546 |
| C | -5.277578 | -4.401495 | 1.578708  |
| C | -3.079747 | -0.059757 | 2.436050  |
| C | -2.341480 | -2.712626 | -2.002361 |
| C | -4.418301 | 0.892433  | -1.328128 |
| C | -3.555787 | 5.550067  | 0.057937  |
| C | 0.013118  | 2.327458  | 1.036018  |
| C | -0.304444 | 1.216770  | -2.882078 |
| C | 0.330204  | -2.239588 | 0.943864  |
| C | 3.405741  | -2.049792 | -2.927822 |
| F | -3.356340 | 6.194353  | -1.124269 |
| F | -4.886409 | 5.607842  | 0.319127  |
| F | -2.919088 | 6.266926  | 1.015569  |
| F | 0.930685  | 3.108721  | 0.399248  |
| F | -0.038538 | 2.770634  | 2.320877  |
| F | 0.516054  | 1.078836  | 1.074091  |
| F | -3.865743 | -0.069076 | -2.100094 |

|   |           |           |           |
|---|-----------|-----------|-----------|
| F | -5.286069 | 1.563481  | -2.129089 |
| F | -5.178601 | 0.263578  | -0.388478 |
| F | -0.047612 | 2.398072  | -2.247865 |
| F | 0.170689  | 1.361180  | -4.144682 |
| F | -1.649339 | 1.110714  | -2.998255 |
| F | 4.080968  | -1.091810 | -3.604403 |
| F | 3.035112  | -2.993885 | -3.839929 |
| F | 4.277712  | -2.646821 | -2.077799 |
| F | -0.464801 | -3.338714 | 0.810625  |
| F | 1.473004  | -2.677957 | 1.531255  |
| F | -0.266269 | -1.424834 | 1.843760  |
| F | -5.043491 | -5.593965 | 0.978900  |
| F | -6.570893 | -4.068378 | 1.316278  |
| F | -5.182248 | -4.590713 | 2.918899  |
| F | -1.925571 | -1.639801 | -2.706378 |
| F | -1.290467 | -3.575961 | -1.935716 |
| F | -3.288106 | -3.320487 | -2.767941 |
| F | -3.314550 | -0.468377 | 3.709713  |
| F | -1.849577 | 0.502910  | 2.446813  |
| F | -3.971809 | 0.938512  | 2.185644  |
| P | 4.406414  | -0.448937 | 0.799247  |
| C | 6.122498  | -0.858116 | 1.319316  |
| C | 3.806226  | 0.646366  | 2.148218  |
| C | 4.682600  | 0.740292  | -0.576967 |
| C | 6.742593  | -1.944739 | 0.680639  |
| C | 6.828588  | -0.162992 | 2.311213  |
| C | 4.027341  | 2.031195  | 2.199091  |
| C | 3.066130  | 0.041015  | 3.175997  |
| C | 5.902404  | 0.877107  | -1.253897 |
| C | 3.572623  | 1.468264  | -1.039626 |
| C | 8.048100  | -2.310605 | 1.007298  |
| H | 6.197900  | -2.501544 | -0.078423 |
| C | 8.128327  | -0.541177 | 2.648929  |
| H | 6.359255  | 0.672292  | 2.823148  |
| C | 3.520985  | 2.789238  | 3.254383  |
| H | 4.588281  | 2.516735  | 1.405596  |
| C | 2.568971  | 0.798347  | 4.235711  |
| H | 2.870440  | -1.027462 | 3.135380  |
| C | 6.006402  | 1.719281  | -2.362736 |
| H | 6.775569  | 0.328402  | -0.912908 |
| C | 3.681177  | 2.319656  | -2.136008 |
| H | 2.620139  | 1.376220  | -0.526861 |
| C | 8.743047  | -1.610585 | 1.995223  |
| H | 8.517550  | -3.148748 | 0.499018  |
| H | 8.663116  | 0.003522  | 3.422827  |
| C | 2.793129  | 2.175152  | 4.275228  |
| H | 3.693393  | 3.862172  | 3.277938  |
| H | 1.993346  | 0.316054  | 5.021183  |
| C | 4.900250  | 2.443421  | -2.807223 |
| H | 6.959817  | 1.812351  | -2.876355 |
| H | 2.811767  | 2.881879  | -2.466847 |
| H | 9.756211  | -1.901566 | 2.259279  |
| H | 2.392721  | 2.769431  | 5.092051  |
| H | 4.986278  | 3.100646  | -3.668175 |

**78. FLP<sub>17</sub>: Acid R = CF<sub>3</sub>. Base R = OCH<sub>3</sub>****E<sub>elec</sub> = -5821.167671 a.u.; H = -5820.210638 a.u**

|   |           |           |           |
|---|-----------|-----------|-----------|
| C | -1.389027 | 2.317139  | 0.491579  |
| C | -1.296505 | 0.944383  | 0.901981  |
| C | -1.331119 | 0.859134  | 2.338939  |
| C | -1.640655 | 1.926303  | 3.188026  |
| C | -1.871856 | 3.195828  | 2.696251  |
| C | -1.688859 | 3.387961  | 1.344438  |
| B | -1.488641 | -0.338008 | -0.342662 |
| C | -2.239272 | -1.860400 | 0.163114  |
| C | -3.594725 | -2.198065 | -0.224244 |
| C | -4.475526 | -2.890324 | 0.612434  |
| C | -4.041977 | -3.461935 | 1.795943  |
| C | -2.672540 | -3.530755 | 1.973898  |
| C | -1.801071 | -2.798074 | 1.160515  |
| C | -2.824420 | 0.453156  | -1.219979 |
| C | -3.927017 | 0.973897  | -0.447523 |
| C | -4.899541 | 1.844112  | -0.957407 |
| C | -4.902359 | 2.224140  | -2.282774 |
| C | -3.963592 | 1.642286  | -3.107469 |
| C | -2.982563 | 0.775694  | -2.607286 |
| H | -1.711010 | 1.748684  | 4.253489  |
| H | -1.789964 | 4.382223  | 0.925247  |
| H | -5.676334 | 2.212732  | -0.298110 |
| H | -3.985303 | 1.854336  | -4.169868 |
| H | -5.507226 | -3.012527 | 0.303565  |
| H | -2.259242 | -4.156250 | 2.756214  |
| C | -2.191363 | 4.339053  | 3.614609  |
| C | -1.024738 | -0.371872 | 3.171704  |
| C | -1.162913 | 2.910661  | -0.889440 |
| C | -2.228997 | 0.251197  | -3.822570 |
| C | -5.885780 | 3.232552  | -2.805792 |
| C | -4.372393 | 0.672044  | 0.990430  |
| C | -4.219751 | -2.105606 | -1.614622 |
| C | -4.995382 | -4.073602 | 2.778610  |
| C | -0.401152 | -3.356252 | 1.301981  |
| F | -4.457820 | -5.152217 | 3.413577  |
| F | -5.350840 | -3.189534 | 3.754658  |
| F | -6.149555 | -4.487922 | 2.191526  |
| F | -0.036490 | -3.658796 | 2.587270  |
| F | 0.593711  | -2.652947 | 0.762882  |
| F | -0.392292 | -4.591096 | 0.668294  |
| F | -4.834042 | -3.308978 | -1.894176 |
| F | -3.328571 | -1.948112 | -2.609531 |
| F | -5.205912 | -1.182868 | -1.772961 |
| F | -3.685595 | -0.211429 | 1.725619  |
| F | -4.429533 | 1.823998  | 1.731303  |
| F | -5.656492 | 0.190798  | 0.963486  |
| F | -7.055139 | 3.217902  | -2.114496 |
| F | -6.186717 | 3.025733  | -4.115048 |
| F | -5.396320 | 4.504132  | -2.715839 |
| F | -3.119473 | -0.271199 | -4.730154 |
| F | -1.620631 | 1.279318  | -4.498935 |
| F | -1.315675 | -0.703777 | -3.633628 |
| F | -2.096590 | -1.145938 | 3.475191  |

|   |           |           |           |
|---|-----------|-----------|-----------|
| F | -0.500878 | -0.035665 | 4.396041  |
| F | -0.092758 | -1.135282 | 2.582009  |
| F | -1.047700 | 4.916263  | 4.107367  |
| F | -2.917012 | 3.948680  | 4.691708  |
| F | -2.880674 | 5.326030  | 2.990254  |
| F | -0.277792 | 3.964926  | -0.785276 |
| F | -0.656886 | 2.102059  | -1.821275 |
| F | -2.295229 | 3.476940  | -1.400698 |
| N | 0.005893  | -0.661263 | -1.082704 |
| N | 1.200805  | 0.157146  | -1.184375 |
| C | 0.185924  | -1.763292 | -1.934263 |
| C | 1.671730  | 0.495909  | -2.468556 |
| O | 1.105811  | -1.879842 | -2.731797 |
| O | -0.772797 | -2.702730 | -1.794692 |
| O | 2.894937  | 0.617701  | -2.583226 |
| O | 0.806854  | 0.782247  | -3.412594 |
| C | -0.842678 | -3.690600 | -2.873383 |
| C | 1.389933  | 1.023781  | -4.739114 |
| C | -1.655244 | -4.871000 | -2.380363 |
| H | 0.175168  | -3.972043 | -3.149732 |
| H | -1.314353 | -3.199020 | -3.728554 |
| C | 1.689382  | -0.288193 | -5.441994 |
| H | 2.286983  | 1.633949  | -4.608455 |
| H | 0.615688  | 1.596880  | -5.247795 |
| H | -1.754130 | -5.594342 | -3.197436 |
| H | -1.167060 | -5.363413 | -1.536480 |
| H | -2.657047 | -4.565848 | -2.072781 |
| H | 2.067885  | -0.074473 | -6.448483 |
| H | 2.440203  | -0.858431 | -4.890951 |
| H | 0.783690  | -0.893522 | -5.523958 |
| P | 2.835422  | -0.015792 | -0.341443 |
| C | 3.705364  | 1.598099  | -0.109993 |
| C | 2.501109  | -0.317449 | 1.425090  |
| C | 4.049447  | -1.200689 | -1.062468 |
| C | 3.385876  | 2.843839  | -0.695780 |
| C | 4.827195  | 1.576465  | 0.747665  |
| C | 2.055475  | 0.824410  | 2.150753  |
| C | 3.001167  | -1.384295 | 2.208099  |
| C | 5.279746  | -0.752792 | -1.626885 |
| C | 3.809517  | -2.596570 | -1.174647 |
| C | 4.155713  | 3.983658  | -0.452014 |
| O | 2.264597  | 2.916029  | -1.454361 |
| C | 5.581732  | 2.718863  | 1.038356  |
| O | 5.198741  | 0.351027  | 1.219285  |
| C | 2.140532  | 0.917407  | 3.532160  |
| O | 1.533676  | 1.841266  | 1.412788  |
| C | 3.006759  | -1.341242 | 3.607947  |
| O | 3.552168  | -2.430723 | 1.553487  |
| C | 6.259001  | -1.641113 | -2.090723 |
| O | 5.491449  | 0.580514  | -1.724975 |
| C | 4.774720  | -3.487350 | -1.646113 |
| O | 2.589517  | -3.037194 | -0.815889 |
| C | 5.240370  | 3.922193  | 0.421253  |
| H | 3.892992  | 4.940996  | -0.883426 |
| C | 2.132437  | 4.011891  | -2.370054 |

|   |          |           |           |
|---|----------|-----------|-----------|
| H | 6.437478 | 2.646812  | 1.694845  |
| C | 6.152708 | 0.265580  | 2.278719  |
| C | 2.588642 | -0.183976 | 4.261315  |
| H | 1.771129 | 1.783141  | 4.065348  |
| C | 1.623503 | 3.170550  | 1.960053  |
| H | 3.366511 | -2.192367 | 4.167712  |
| C | 3.934222 | -3.599499 | 2.278684  |
| C | 6.006882 | -3.009723 | -2.079727 |
| H | 7.187352 | -1.251295 | -2.481674 |
| C | 6.721524 | 1.079280  | -2.245631 |
| H | 4.583965 | -4.550375 | -1.700103 |
| C | 2.240545 | -4.386597 | -1.139692 |
| O | 5.909853 | 5.098840  | 0.616820  |
| H | 1.933106 | 4.951444  | -1.842988 |
| H | 3.035533 | 4.105064  | -2.984419 |
| H | 1.272938 | 3.760528  | -2.989905 |
| H | 5.834839 | 0.866540  | 3.139049  |
| H | 6.174125 | -0.789489 | 2.553365  |
| H | 7.149969 | 0.578934  | 1.943480  |
| O | 2.569811 | -0.038518 | 5.615483  |
| H | 2.653228 | 3.375712  | 2.272423  |
| H | 1.333440 | 3.831666  | 1.145939  |
| H | 0.935012 | 3.297381  | 2.799976  |
| H | 4.741025 | -3.384053 | 2.991836  |
| H | 3.073664 | -4.033049 | 2.801872  |
| H | 4.299407 | -4.292612 | 1.519794  |
| O | 6.896115 | -3.955804 | -2.503961 |
| H | 7.575048 | 0.750599  | -1.638187 |
| H | 6.864522 | 0.772746  | -3.289565 |
| H | 6.625976 | 2.164171  | -2.187533 |
| H | 2.412776 | -4.579865 | -2.203919 |
| H | 2.810233 | -5.098822 | -0.529001 |
| H | 1.184905 | -4.473174 | -0.906354 |
| C | 7.000438 | 5.097076  | 1.544170  |
| C | 2.883585 | -1.185281 | 6.416056  |
| C | 8.162822 | -3.506367 | -2.997845 |
| H | 7.362870 | 6.125325  | 1.568245  |
| H | 6.666194 | 4.798381  | 2.545989  |
| H | 7.805185 | 4.430137  | 1.207784  |
| H | 2.742077 | -0.864372 | 7.448460  |
| H | 2.205853 | -2.016693 | 6.187912  |
| H | 3.924958 | -1.499261 | 6.266898  |
| H | 8.705789 | -4.411991 | -3.270588 |
| H | 8.037566 | -2.869832 | -3.883022 |
| H | 8.717752 | -2.960977 | -2.223618 |

#### 79. FLP: Reference

$E_{\text{elec}} = -2071.690882$  a.u.;  $H = -2070.883312$  a.u

|   |           |          |           |
|---|-----------|----------|-----------|
| C | -1.475640 | 3.719389 | -3.510221 |
| C | -2.430443 | 3.573027 | -2.503308 |
| C | -2.234400 | 2.730505 | -1.402437 |
| C | -1.033738 | 1.987419 | -1.307330 |
| C | -0.039377 | 2.152981 | -2.304824 |
| C | -0.278837 | 3.011056 | -3.380989 |
| P | -0.653007 | 0.742385 | 0.001549  |



|   |           |           |           |
|---|-----------|-----------|-----------|
| C | -2.252558 | -0.086952 | 0.397400  |
| C | -2.708800 | -0.940765 | -0.647064 |
| C | -3.812421 | -1.769273 | -0.439975 |
| C | -4.498609 | -1.799280 | 0.775329  |
| C | -4.056839 | -0.941616 | 1.781065  |
| C | -2.958997 | -0.084501 | 1.625933  |
| B | 1.727103  | -2.232187 | -0.087316 |
| C | 1.043816  | -3.028281 | -1.253729 |
| C | 1.128269  | -2.592668 | -2.594487 |
| C | 0.495550  | -3.275352 | -3.630697 |
| C | -0.231098 | -4.436288 | -3.358218 |
| C | -0.319010 | -4.905310 | -2.045721 |
| C | 0.304351  | -4.206877 | -1.013423 |
| C | 1.175133  | -2.343185 | 1.377789  |
| C | 2.039043  | -2.255480 | 2.491306  |
| C | 1.557334  | -2.318439 | 3.798249  |
| C | 0.185812  | -2.449279 | 4.030303  |
| C | -0.694299 | -2.538459 | 2.949125  |
| C | -0.201922 | -2.501018 | 1.645847  |
| C | 2.989969  | -1.352443 | -0.368558 |
| C | 3.939076  | -1.685874 | -1.357584 |
| C | 5.052057  | -0.885543 | -1.605535 |
| C | 5.257386  | 0.304065  | -0.894482 |
| C | 4.324123  | 0.649148  | 0.093365  |
| C | 3.228938  | -0.166040 | 0.357926  |
| C | -0.057426 | 1.765622  | 1.396813  |
| C | 0.003463  | 3.165015  | 1.350995  |
| C | 0.613271  | 3.885867  | 2.379664  |
| C | 1.180749  | 3.241831  | 3.483870  |
| C | 1.128370  | 1.839661  | 3.521261  |
| C | 0.535008  | 1.114959  | 2.495402  |
| H | 2.247168  | -2.253938 | 4.636226  |
| H | -1.764379 | -2.623131 | 3.117342  |
| H | 5.772784  | -1.183871 | -2.364818 |
| H | 4.459219  | 1.568189  | 0.661144  |
| H | 0.564084  | -2.902455 | -4.649613 |
| H | -0.875432 | -5.813939 | -1.829293 |
| H | 0.643658  | 4.972323  | 2.321552  |
| H | 1.570007  | 1.304915  | 4.360192  |
| H | -4.136892 | -2.413917 | -1.255663 |
| H | -4.589570 | -0.924669 | 2.731217  |
| H | -3.357302 | 4.141994  | -2.564269 |
| H | 0.495170  | 3.129184  | -4.137964 |
| H | -0.195010 | -2.479015 | 5.048237  |
| H | -0.902805 | -2.550968 | 0.818483  |
| H | 1.683529  | -1.686641 | -2.821506 |
| H | 0.229946  | -4.585661 | 0.002703  |
| H | 2.521255  | 0.137620  | 1.123395  |
| H | 3.810302  | -2.601930 | -1.929559 |
| C | 6.431864  | 1.201706  | -1.198020 |
| H | -0.724487 | -4.973707 | -4.164359 |
| H | 3.106324  | -2.134985 | 2.322669  |
| C | 1.844905  | 4.020309  | 4.593785  |
| H | 0.525149  | 0.029919  | 2.546544  |
| H | -0.426192 | 3.696127  | 0.506074  |

|   |           |           |           |
|---|-----------|-----------|-----------|
| C | -2.622898 | 0.791891  | 2.809062  |
| C | -5.662346 | -2.735464 | 0.993600  |
| C | 1.295253  | 1.451157  | -2.222839 |
| C | -2.041302 | -0.975388 | -2.000051 |
| C | -3.315623 | 2.684564  | -0.349995 |
| C | -1.730922 | 4.605258  | -4.705588 |
| H | -6.274492 | -2.417644 | 1.843469  |
| H | -6.303827 | -2.786846 | 0.107065  |
| H | -5.310170 | -3.754659 | 1.200111  |
| H | -2.319215 | -1.881766 | -2.545110 |
| H | -2.321214 | -0.104628 | -2.605085 |
| H | -0.949922 | -0.959008 | -1.903149 |
| H | -3.485601 | 0.850456  | 3.479907  |
| H | -1.780703 | 0.386476  | 3.381311  |
| H | -2.343496 | 1.806082  | 2.516565  |
| H | -3.973346 | 3.553806  | -0.447956 |
| H | -3.928600 | 1.780880  | -0.436296 |
| H | -2.889951 | 2.687381  | 0.657281  |
| H | -0.806944 | 5.076271  | -5.057005 |
| H | -2.139331 | 4.021283  | -5.540797 |
| H | -2.453411 | 5.393289  | -4.470491 |
| H | 1.879920  | 1.624672  | -3.131456 |
| H | 1.883548  | 1.807711  | -1.369385 |
| H | 1.176679  | 0.373331  | -2.077360 |
| H | 1.416361  | 3.761955  | 5.569411  |
| H | 2.918260  | 3.798263  | 4.643225  |
| H | 1.730551  | 5.098412  | 4.446540  |
| H | 6.819412  | 1.671593  | -0.287865 |
| H | 7.245789  | 0.647441  | -1.675675 |
| H | 6.135361  | 2.009052  | -1.880731 |

#### 4. FLP-DEAD cartesian coordinates

##### 80. Linker = DEAD

$E_{\text{elec}} = -645.3876395$  a.u.;  $H = -645.205943$  a.u

|   |           |           |           |
|---|-----------|-----------|-----------|
| N | -0.298324 | 0.697857  | -0.862889 |
| N | 0.851645  | 0.252894  | -0.688186 |
| C | 1.879083  | 1.275120  | -0.719755 |
| O | 2.510018  | 1.511319  | -1.720798 |
| O | 2.067243  | 1.766060  | 0.507748  |
| C | -1.309099 | -0.335791 | -0.970056 |
| O | -1.691365 | -0.742374 | -2.039877 |
| O | -1.790128 | -0.626058 | 0.241367  |
| C | 3.195476  | 2.701641  | 0.634218  |
| C | 3.281221  | 3.093171  | 2.094424  |
| H | 2.996863  | 3.555162  | -0.020430 |
| H | 4.095306  | 2.191255  | 0.278211  |
| H | 2.357048  | 3.577457  | 2.422945  |
| H | 3.461591  | 2.216660  | 2.723522  |
| C | -2.934343 | -1.550689 | 0.248015  |
| C | -3.368651 | -1.703387 | 1.690551  |
| H | -2.603894 | -2.494542 | -0.195217 |
| H | -3.715162 | -1.121852 | -0.387082 |
| H | -2.557208 | -2.110429 | 2.300824  |
| H | -3.674917 | -0.740612 | 2.109881  |

|   |           |           |          |
|---|-----------|-----------|----------|
| H | 4.109582  | 3.796176  | 2.232177 |
| H | -4.219617 | -2.390903 | 1.741059 |

**81. FLP<sub>3</sub> - Linker. Acid R = NH<sub>2</sub>. Base R = H**

**E<sub>elec</sub>** = -2900.952356 a.u.; **H** = -2900.030996 a.u

|   |           |           |           |
|---|-----------|-----------|-----------|
| C | -4.279298 | -1.550593 | -1.823851 |
| C | -4.358318 | -0.441744 | -0.966597 |
| C | -5.603600 | 0.057990  | -0.560457 |
| C | -6.771295 | -0.559075 | -1.005840 |
| C | -6.697910 | -1.667856 | -1.850982 |
| C | -5.455265 | -2.157811 | -2.259130 |
| P | -2.821297 | 0.344270  | -0.452837 |
| C | -2.213242 | 1.383474  | -1.786431 |
| C | -0.967632 | 2.022404  | -1.661770 |
| C | -0.534123 | 2.876108  | -2.673032 |
| C | -1.320511 | 3.080964  | -3.808750 |
| C | -2.550666 | 2.434714  | -3.937054 |
| C | -3.002870 | 1.589253  | -2.925371 |
| N | -1.588026 | -0.802481 | -0.202363 |
| C | -1.909705 | -1.803674 | 0.697957  |
| O | -0.961171 | -2.731801 | 0.791007  |
| C | -1.192253 | -3.788663 | 1.778275  |
| C | -2.045739 | -4.895046 | 1.182127  |
| N | -0.307485 | -0.696811 | -0.797550 |
| C | -0.356588 | -1.154423 | -2.072392 |
| O | 0.906468  | -1.026785 | -2.617646 |
| C | 1.078063  | -1.599373 | -3.932289 |
| C | 2.524694  | -1.358697 | -4.328794 |
| B | 2.707086  | 0.162407  | 0.944044  |
| C | 3.597421  | -0.819725 | 0.099074  |
| C | 4.921160  | -0.458621 | -0.330701 |
| C | 5.703291  | -1.304689 | -1.127261 |
| C | 5.213305  | -2.547418 | -1.536059 |
| C | 3.936476  | -2.947884 | -1.135561 |
| C | 3.142865  | -2.112443 | -0.335846 |
| C | 1.771746  | -0.344098 | 2.103604  |
| C | 2.119296  | -1.470398 | 2.922280  |
| C | 1.235315  | -2.002620 | 3.871435  |
| C | -0.023628 | -1.431011 | 4.061695  |
| C | -0.386651 | -0.298904 | 3.327058  |
| C | 0.495769  | 0.245925  | 2.384176  |
| C | 2.783775  | 1.716389  | 0.631861  |
| C | 2.949626  | 2.685664  | 1.670234  |
| C | 2.997995  | 4.061898  | 1.403868  |
| C | 2.891959  | 4.525381  | 0.087870  |
| C | 2.738360  | 3.611572  | -0.959398 |
| C | 2.695705  | 2.230061  | -0.701535 |
| C | -3.185815 | 1.430298  | 0.959240  |
| C | -3.788603 | 0.919556  | 2.122991  |
| C | -4.031272 | 1.760438  | 3.207666  |
| C | -3.683548 | 3.110776  | 3.150472  |
| C | -3.103994 | 3.626671  | 1.990174  |
| C | -2.861805 | 2.795924  | 0.897702  |
| O | -1.301352 | -1.608519 | -2.734466 |
| O | -2.982288 | -1.792007 | 1.302840  |
| H | -4.039258 | -0.132399 | 2.174035  |

|   |           |           |           |
|---|-----------|-----------|-----------|
| H | -3.868931 | 3.759481  | 4.002201  |
| H | -2.411673 | 3.210440  | 0.002701  |
| H | -0.348399 | 1.831873  | -0.792213 |
| H | -0.972964 | 3.743997  | -4.596904 |
| H | -3.957570 | 1.083218  | -3.025749 |
| H | -5.661647 | 0.918771  | 0.098365  |
| H | -7.610648 | -2.148973 | -2.192443 |
| H | -3.300357 | -1.903006 | -2.145824 |
| H | -7.737179 | -0.174819 | -0.690055 |
| H | -5.398678 | -3.017838 | -2.920543 |
| H | -4.491395 | 1.353317  | 4.103893  |
| H | -2.839695 | 4.678670  | 1.930351  |
| H | 0.417076  | 3.387017  | -2.556742 |
| H | -3.159212 | 2.584933  | -4.824054 |
| N | 0.039964  | 1.356671  | 1.675647  |
| N | 3.397342  | -2.003410 | 2.867813  |
| H | -1.366294 | 0.152794  | 3.467987  |
| H | 1.542125  | -2.856965 | 4.473061  |
| N | -0.942832 | -2.024505 | 4.938736  |
| N | 5.522159  | 0.707403  | 0.125102  |
| N | 1.900359  | -2.584160 | 0.044247  |
| H | 6.713601  | -1.003212 | -1.399154 |
| H | 3.540161  | -3.908557 | -1.461888 |
| N | 6.016313  | -3.406287 | -2.294183 |
| N | 3.144912  | 2.260805  | 2.980001  |
| N | 2.583162  | 1.371801  | -1.775932 |
| H | 3.159249  | 4.766146  | 2.218325  |
| H | 2.695537  | 3.969296  | -1.987469 |
| N | 3.013916  | 5.893175  | -0.186086 |
| H | 0.370796  | -1.130749 | -4.625994 |
| H | 0.842406  | -2.669689 | -3.888381 |
| H | 2.723524  | -1.818646 | -5.303658 |
| H | 2.738079  | -0.287485 | -4.403529 |
| H | 3.202303  | -1.788492 | -3.584472 |
| H | -1.647682 | -3.342314 | 2.664666  |
| H | -0.180701 | -4.120412 | 2.018330  |
| H | -2.145278 | -5.710301 | 1.908095  |
| H | -3.044480 | -4.520944 | 0.940721  |
| H | -1.585045 | -5.294998 | 0.273209  |
| H | 1.551439  | -3.340163 | -0.533303 |
| H | 1.174762  | -1.878444 | 0.180126  |
| H | 5.508408  | -4.095796 | -2.836061 |
| H | 6.730161  | -2.944426 | -2.845791 |
| H | 6.273163  | 1.058180  | -0.456039 |
| H | 4.884642  | 1.434035  | 0.436596  |
| H | -0.627715 | 1.929458  | 2.177004  |
| H | 0.774176  | 1.895962  | 1.223751  |
| H | -0.523673 | -2.555751 | 5.693788  |
| H | -1.663679 | -1.398066 | 5.278825  |
| H | 3.470540  | -2.975610 | 3.140673  |
| H | 3.910724  | -1.791364 | 2.015074  |
| H | 2.208944  | 1.763397  | -2.629376 |
| H | 2.263475  | 0.423681  | -1.606262 |
| H | 2.911912  | 2.934046  | 3.698891  |
| H | 2.814817  | 1.319127  | 3.180493  |

|   |          |          |           |
|---|----------|----------|-----------|
| H | 2.585515 | 6.194125 | -1.053704 |
| H | 2.771971 | 6.504706 | 0.584938  |

**82. FLP<sub>4</sub> - Linker. Acid R = OCH<sub>3</sub>. Base R = H**

**E<sub>elec</sub>** = -3433.717301 a.u.; **H** = -3432.642363 a.u

|   |           |           |           |
|---|-----------|-----------|-----------|
| C | -3.491482 | 0.593993  | -3.198928 |
| C | -3.877894 | 0.490222  | -1.855202 |
| C | -5.238339 | 0.433601  | -1.519258 |
| C | -6.204690 | 0.473857  | -2.523502 |
| C | -5.820922 | 0.564617  | -3.861551 |
| C | -4.465984 | 0.625608  | -4.193636 |
| P | -2.646164 | 0.502879  | -0.520609 |
| C | -2.421612 | 2.227122  | -0.048988 |
| C | -1.725735 | 2.575962  | 1.116605  |
| C | -1.796646 | 3.877968  | 1.606216  |
| C | -2.533160 | 4.846261  | 0.925919  |
| C | -3.179629 | 4.517829  | -0.268241 |
| C | -3.132061 | 3.213747  | -0.754994 |
| H | -1.133351 | 1.833306  | 1.631121  |
| H | -2.588512 | 5.860676  | 1.312015  |
| H | -3.650724 | 2.961973  | -1.672903 |
| H | -5.544676 | 0.358399  | -0.481038 |
| H | -6.575674 | 0.589682  | -4.643041 |
| H | -2.437620 | 0.673902  | -3.442726 |
| N | -1.161221 | -0.201582 | -1.029796 |
| C | -1.355394 | -1.376703 | -1.757159 |
| O | -0.284542 | -1.759242 | -2.433544 |
| C | -0.417104 | -3.002277 | -3.188266 |
| C | -0.909429 | -2.705816 | -4.594555 |
| N | 0.111057  | 0.411546  | -0.970714 |
| C | 0.237726  | 1.272668  | -2.044149 |
| O | 1.486255  | 1.735256  | -2.227372 |
| C | 1.662869  | 2.618403  | -3.359510 |
| C | 3.117010  | 3.054090  | -3.330871 |
| B | 1.176815  | -0.075006 | 0.261017  |
| C | 1.920167  | -1.522113 | -0.181765 |
| C | 2.197102  | -2.580014 | 0.724875  |
| C | 2.754290  | -3.810625 | 0.362423  |
| C | 3.138631  | -4.020933 | -0.959130 |
| C | 3.005900  | -2.993862 | -1.884330 |
| C | 2.430300  | -1.774308 | -1.465130 |
| O | 1.925044  | -2.334548 | 2.049802  |
| C | 2.299977  | -3.288536 | 3.030643  |
| O | 3.663589  | -5.266628 | -1.246262 |
| C | 4.102550  | -5.489745 | -2.582821 |
| O | 2.378331  | -0.723817 | -2.350723 |
| C | 2.829765  | -0.915451 | -3.677923 |
| C | 0.178877  | -0.337667 | 1.588597  |
| C | -0.589757 | -1.517528 | 1.719723  |
| C | -1.235906 | -1.937185 | 2.891470  |
| C | -1.144419 | -1.140149 | 4.024706  |
| C | -0.427096 | 0.051244  | 3.978885  |
| C | 0.213057  | 0.420233  | 2.788870  |
| O | -0.664241 | -2.328021 | 0.607880  |
| C | -0.979825 | -3.706940 | 0.779542  |

|   |           |           |           |
|---|-----------|-----------|-----------|
| O | 0.919090  | 1.596769  | 2.748708  |
| C | 1.224749  | 2.278068  | 3.958321  |
| O | -1.750421 | -1.436125 | 5.227387  |
| C | -2.302031 | -2.746118 | 5.366543  |
| C | 2.325735  | 1.114329  | 0.493420  |
| C | 3.662336  | 0.817150  | 0.868066  |
| C | 4.685393  | 1.768237  | 0.986573  |
| C | 4.394618  | 3.111078  | 0.791188  |
| C | 3.088916  | 3.493936  | 0.500811  |
| C | 2.104774  | 2.500780  | 0.365683  |
| O | 3.944952  | -0.489780 | 1.169514  |
| C | 5.296675  | -0.923562 | 1.224941  |
| O | 5.449395  | 3.991596  | 0.928206  |
| C | 5.171112  | 5.372891  | 0.718712  |
| O | 0.809153  | 2.905857  | 0.108594  |
| C | 0.608980  | 4.207006  | -0.433564 |
| C | -3.455886 | -0.330296 | 0.886277  |
| C | -3.993546 | -1.619646 | 0.711380  |
| C | -4.706382 | -2.225267 | 1.741179  |
| C | -4.898024 | -1.564002 | 2.955894  |
| C | -4.364221 | -0.290924 | 3.137622  |
| C | -3.654298 | 0.327415  | 2.109731  |
| H | -3.848443 | -2.131019 | -0.230588 |
| H | -5.460835 | -2.039142 | 3.755034  |
| H | -3.265426 | 1.323905  | 2.271561  |
| O | -0.694206 | 1.607288  | -2.785855 |
| O | -2.449892 | -1.933130 | -1.768820 |
| H | -7.256886 | 0.430231  | -2.256534 |
| H | -4.162229 | 0.700905  | -5.234147 |
| H | -5.118047 | -3.219420 | 1.588693  |
| H | -4.488964 | 0.227895  | 4.083063  |
| H | -1.253641 | 4.130999  | 2.511725  |
| H | -3.730452 | 5.274267  | -0.819771 |
| H | -0.372478 | 0.658818  | 4.873764  |
| H | -1.819010 | -2.847292 | 2.895361  |
| H | 2.918683  | -4.604011 | 1.081037  |
| H | 3.364938  | -3.110891 | -2.897551 |
| H | 5.695992  | 1.488961  | 1.257777  |
| H | 2.826965  | 4.538158  | 0.399808  |
| H | 0.970898  | 3.462884  | -3.276102 |
| H | 1.406748  | 2.075690  | -4.277248 |
| H | 3.316503  | 3.742770  | -4.159443 |
| H | 3.348729  | 3.552794  | -2.384570 |
| H | 3.781620  | 2.189959  | -3.421344 |
| H | -1.100128 | -3.665464 | -2.652031 |
| H | 0.593810  | -3.414984 | -3.168441 |
| H | -0.934333 | -3.632130 | -5.179786 |
| H | -1.918597 | -2.284843 | -4.565161 |
| H | -0.243067 | -1.995779 | -5.093973 |
| H | 1.902295  | 3.082394  | 3.664476  |
| H | 0.325133  | 2.705057  | 4.426839  |
| H | 1.725341  | 1.614289  | 4.675191  |
| H | -0.727191 | -4.182768 | -0.169106 |
| H | -0.376310 | -4.148400 | 1.580945  |
| H | -2.047821 | -3.853999 | 0.989995  |

|   |           |           |           |
|---|-----------|-----------|-----------|
| H | -2.659658 | -2.807358 | 6.396193  |
| H | -3.140878 | -2.903913 | 4.676546  |
| H | -1.537949 | -3.515346 | 5.191079  |
| H | 2.023261  | -2.837886 | 3.985751  |
| H | 1.761264  | -4.240141 | 2.910158  |
| H | 3.381464  | -3.483632 | 3.008880  |
| H | 2.657867  | 0.034759  | -4.186207 |
| H | 3.902166  | -1.157289 | -3.716250 |
| H | 2.265023  | -1.705293 | -4.195739 |
| H | 4.472119  | -6.516869 | -2.606092 |
| H | 3.276330  | -5.380610 | -3.300271 |
| H | 4.913327  | -4.801172 | -2.859494 |
| H | -0.390702 | 4.198027  | -0.870759 |
| H | 0.657502  | 4.984020  | 0.342973  |
| H | 1.348435  | 4.429989  | -1.210918 |
| H | 6.124696  | 5.889410  | 0.844988  |
| H | 4.785477  | 5.554586  | -0.294551 |
| H | 4.448275  | 5.754137  | 1.454133  |
| H | 5.243412  | -2.013737 | 1.275917  |
| H | 5.850615  | -0.625262 | 0.324628  |
| H | 5.813954  | -0.537782 | 2.115578  |

**83. FLP<sub>5</sub> - Linker. Acid R = NH<sub>2</sub>. Base R = NH<sub>2</sub>**

**E<sub>elec</sub>** = -3399.468826 a.u.; **H** = -3398.389200 a.u

|   |           |           |           |
|---|-----------|-----------|-----------|
| C | -2.304090 | 0.101888  | 2.716764  |
| C | -3.346302 | -0.544008 | 1.978781  |
| C | -3.949437 | -1.674608 | 2.622074  |
| C | -3.552292 | -2.098410 | 3.898984  |
| C | -2.543186 | -1.423312 | 4.588963  |
| C | -1.921026 | -0.316889 | 3.998114  |
| B | -3.787097 | -0.045160 | 0.557072  |
| N | 0.149052  | -0.166127 | -0.833533 |
| N | 1.165695  | 0.637318  | -0.224911 |
| P | 2.790514  | 0.067556  | -0.051485 |
| C | 3.102928  | -0.895909 | 1.435144  |
| C | 2.103060  | -1.309488 | 2.373529  |
| C | 2.389732  | -2.334463 | 3.289256  |
| C | 3.632758  | -2.966486 | 3.299282  |
| C | 4.633146  | -2.557136 | 2.409277  |
| C | 4.389141  | -1.535557 | 1.488775  |
| N | 0.873172  | -0.723696 | 2.451195  |
| N | 3.910010  | -3.951245 | 4.249146  |
| N | 5.440206  | -1.123429 | 0.694121  |
| N | -5.036637 | -2.317009 | 2.045708  |
| N | -2.102971 | -1.888575 | 5.833057  |
| N | -1.560275 | 1.106344  | 2.116890  |
| C | -4.145547 | -1.108420 | -0.547262 |
| C | -5.334688 | -1.008444 | -1.336880 |
| C | -5.696705 | -2.001792 | -2.255945 |
| C | -4.884277 | -3.125262 | -2.438343 |
| C | -3.703396 | -3.250239 | -1.701776 |
| C | -3.329264 | -2.257063 | -0.788287 |
| N | -5.205980 | -4.075459 | -3.414867 |
| N | -6.230784 | 0.037690  | -1.127630 |
| N | -2.123128 | -2.428636 | -0.109817 |

|   |           |           |           |
|---|-----------|-----------|-----------|
| C | -3.926291 | 1.491787  | 0.238468  |
| C | -4.472236 | 2.426514  | 1.185509  |
| C | -4.699828 | 3.771165  | 0.856121  |
| C | -4.363147 | 4.256056  | -0.410941 |
| C | -3.800118 | 3.392975  | -1.355115 |
| C | -3.587624 | 2.040168  | -1.047261 |
| N | -4.772907 | 2.031862  | 2.475291  |
| N | -4.508446 | 5.615970  | -0.704681 |
| N | -3.058517 | 1.244181  | -2.042560 |
| C | 0.074171  | 0.027966  | -2.164863 |
| O | 0.686908  | 0.814459  | -2.907092 |
| O | -0.879761 | -0.823924 | -2.682865 |
| C | -1.046698 | -0.751841 | -4.121247 |
| C | -2.250548 | -1.602179 | -4.478839 |
| C | 0.824967  | 1.869321  | 0.352615  |
| O | 1.412692  | 2.348884  | 1.311079  |
| O | -0.208787 | 2.440019  | -0.293436 |
| C | -0.555352 | 3.783964  | 0.164667  |
| C | 0.309565  | 4.810307  | -0.549021 |
| C | 3.086751  | -1.174797 | -1.347432 |
| C | 2.421742  | -2.443795 | -1.164962 |
| C | 2.896379  | -3.602074 | -1.792721 |
| C | 4.019700  | -3.568176 | -2.617302 |
| C | 4.658410  | -2.344855 | -2.839231 |
| C | 4.217903  | -1.168831 | -2.223408 |
| N | 1.346218  | -2.543178 | -0.320076 |
| N | 4.520882  | -4.738917 | -3.186488 |
| N | 4.994192  | -0.026904 | -2.398564 |
| C | 3.766336  | 1.578968  | -0.077059 |
| C | 4.432130  | 2.107325  | 1.088700  |
| C | 5.081596  | 3.350124  | 1.023550  |
| C | 5.031381  | 4.147276  | -0.115414 |
| C | 4.306451  | 3.699205  | -1.224654 |
| C | 3.673939  | 2.456518  | -1.210114 |
| N | 4.500103  | 1.459490  | 2.293322  |
| N | 5.716635  | 5.358130  | -0.167267 |
| N | 3.036498  | 2.056627  | -2.376952 |
| H | 5.603856  | 3.704630  | 1.909979  |
| H | 4.226890  | 4.320447  | -2.114509 |
| H | 1.616005  | -2.636789 | 3.991872  |
| H | 5.622900  | -3.006142 | 2.454512  |
| H | 2.357043  | -4.534968 | -1.640147 |
| H | 5.523866  | -2.295369 | -3.497612 |
| H | 0.665011  | -1.755545 | -0.371997 |
| H | 0.957441  | -3.469642 | -0.203990 |
| H | 3.851866  | -5.494234 | -3.277919 |
| H | 5.065426  | -4.609599 | -4.031066 |
| H | 5.719534  | -0.151386 | -3.096517 |
| H | 4.440870  | 0.821352  | -2.574374 |
| H | 6.157352  | -1.810760 | 0.508848  |
| H | 5.301634  | -0.470587 | -0.071810 |
| H | 4.644369  | -4.600612 | 3.993493  |
| H | 3.097245  | -4.423405 | 4.627253  |
| H | 0.524451  | -0.108643 | 1.731426  |
| H | 0.146484  | -1.195007 | 2.974532  |



|   |           |           |           |
|---|-----------|-----------|-----------|
| H | 2.155423  | 1.500395  | -2.354046 |
| H | 2.947830  | 2.801870  | -3.059124 |
| H | 5.924028  | 5.781448  | 0.729200  |
| H | 5.365290  | 6.029658  | -0.839136 |
| H | 3.849865  | 0.702686  | 2.474385  |
| H | 4.739660  | 2.032345  | 3.089555  |
| H | -4.050794 | -2.948723 | 4.361706  |
| H | -1.117985 | 0.202081  | 4.518250  |
| H | -5.119704 | 4.443954  | 1.602033  |
| H | -3.516937 | 3.769656  | -2.336485 |
| H | -6.622626 | -1.902751 | -2.820261 |
| H | -3.042416 | -4.097907 | -1.874992 |
| H | -0.127022 | -1.110134 | -4.598900 |
| H | -1.185150 | 0.294369  | -4.415463 |
| H | -2.411190 | -1.571203 | -5.562622 |
| H | -2.101220 | -2.643280 | -4.179362 |
| H | -3.151954 | -1.235433 | -3.979708 |
| H | -0.420417 | 3.833097  | 1.248436  |
| H | -1.611749 | 3.883098  | -0.089927 |
| H | 0.005721  | 5.819564  | -0.248260 |
| H | 1.364386  | 4.668041  | -0.294955 |
| H | 0.189319  | 4.719204  | -1.633283 |
| H | -1.666204 | -1.185695 | 6.418537  |
| H | -2.782288 | -2.437664 | 6.347128  |
| H | -5.191792 | -3.266167 | 2.361375  |
| H | -5.115292 | -2.210136 | 1.037765  |
| H | -1.076670 | 1.743690  | 2.736933  |
| H | -1.994540 | 1.552709  | 1.314070  |
| H | -5.451975 | 2.582739  | 2.981013  |
| H | -4.767416 | 1.038007  | 2.676812  |
| H | -4.594576 | 5.831255  | -1.691371 |
| H | -5.206070 | 6.099813  | -0.151250 |
| H | -2.474190 | 1.718971  | -2.718754 |
| H | -2.694841 | 0.336975  | -1.775045 |
| H | -5.819534 | 0.868130  | -0.709551 |
| H | -6.821889 | 0.251619  | -1.921744 |
| H | -1.450886 | -2.954872 | -0.657427 |
| H | -1.693602 | -1.565258 | 0.212489  |
| H | -4.815584 | -4.996814 | -3.253336 |
| H | -6.189825 | -4.122159 | -3.653883 |

**84. FLP<sub>6</sub> - Linker. Acid R = OCH<sub>3</sub>. Base R = OCH<sub>3</sub>**

**E<sub>elec</sub>** = -4464.962061 a.u.; **H** = -4463.583592 a.u

|   |           |           |           |
|---|-----------|-----------|-----------|
| C | 3.510337  | -1.708208 | 1.395825  |
| C | 2.487597  | -0.741093 | 1.566154  |
| C | 1.915964  | -0.679324 | 2.852970  |
| C | 2.183488  | -1.634828 | 3.835978  |
| C | 3.082375  | -2.660795 | 3.569762  |
| C | 3.782353  | -2.684618 | 2.358473  |
| P | 2.009381  | 0.365628  | 0.174208  |
| N | 0.359601  | 0.988125  | 0.173048  |
| N | -0.711470 | 0.613514  | -0.707556 |
| B | -2.187851 | -0.047403 | -0.156881 |
| C | -2.886135 | -1.008284 | -1.370890 |
| C | -4.292698 | -1.120551 | -1.578573 |

|   |           |           |           |
|---|-----------|-----------|-----------|
| C | -4.906680 | -2.049002 | -2.433894 |
| C | -4.127826 | -2.909702 | -3.191491 |
| C | -2.746125 | -2.799983 | -3.120253 |
| C | -2.175875 | -1.854198 | -2.249262 |
| O | -5.104983 | -0.228668 | -0.926666 |
| C | -6.512627 | -0.392417 | -0.949063 |
| O | -4.803018 | -3.817871 | -3.985656 |
| C | -4.008024 | -4.672063 | -4.801763 |
| O | -0.793371 | -1.768981 | -2.270307 |
| C | -0.180960 | -1.981858 | -3.544536 |
| C | 3.245745  | 1.725643  | 0.109441  |
| C | 3.073065  | 2.864205  | -0.722008 |
| C | 4.120103  | 3.735080  | -1.047913 |
| C | 5.370378  | 3.534001  | -0.469190 |
| C | 5.548944  | 2.527469  | 0.477339  |
| C | 4.492759  | 1.673215  | 0.799367  |
| C | 2.194729  | -0.766137 | -1.226618 |
| C | 1.785537  | -2.115617 | -1.044236 |
| C | 2.229556  | -3.140062 | -1.879236 |
| C | 3.051393  | -2.831115 | -2.959723 |
| C | 3.437645  | -1.514349 | -3.212464 |
| C | 3.016503  | -0.496070 | -2.344413 |
| C | 0.305854  | 2.223422  | 0.848899  |
| O | 1.168038  | 2.543896  | 1.654588  |
| O | -0.717532 | 2.986374  | 0.480146  |
| C | -0.864644 | 4.223559  | 1.228920  |
| C | -0.031971 | 5.339803  | 0.618663  |
| C | -0.448710 | 0.930419  | -2.023665 |
| O | 0.638865  | 1.242872  | -2.506515 |
| O | -1.556845 | 0.842307  | -2.793315 |
| C | -1.399545 | 1.187989  | -4.179441 |
| C | -2.728310 | 0.864610  | -4.841592 |
| C | -3.279864 | 1.163962  | 0.305097  |
| C | -4.259395 | 0.914539  | 1.307658  |
| C | -5.162157 | 1.860652  | 1.800905  |
| C | -5.164831 | 3.141348  | 1.256595  |
| C | -4.313974 | 3.435995  | 0.201134  |
| C | -3.427209 | 2.438594  | -0.266619 |
| O | -4.333463 | -0.379622 | 1.771348  |
| C | -5.288601 | -0.718055 | 2.763298  |
| O | -6.060038 | 4.037531  | 1.813711  |
| C | -6.106539 | 5.339962  | 1.241231  |
| O | -2.665888 | 2.718027  | -1.381204 |
| C | -2.819159 | 3.962273  | -2.031630 |
| C | -1.804471 | -0.931452 | 1.214958  |
| C | -1.655600 | -0.296960 | 2.463381  |
| C | -1.639099 | -0.947381 | 3.708438  |
| C | -1.768115 | -2.328499 | 3.745547  |
| C | -1.911256 | -3.032910 | 2.554860  |
| C | -1.917482 | -2.338040 | 1.338258  |
| O | -1.583080 | 1.082687  | 2.462147  |
| C | -2.198497 | 1.782257  | 3.543275  |
| O | -1.752286 | -3.084055 | 4.902228  |
| C | -1.605460 | -2.377870 | 6.129825  |
| O | -2.050389 | -3.064020 | 0.179329  |

|   |           |           |           |
|---|-----------|-----------|-----------|
| C | -2.712225 | -4.322425 | 0.225843  |
| O | 0.980305  | -2.355781 | 0.008559  |
| O | 3.414284  | -3.892089 | -3.745333 |
| O | 3.422124  | 0.781693  | -2.527486 |
| O | 4.626504  | 0.787439  | 1.818448  |
| O | 6.468063  | 4.308265  | -0.726346 |
| O | 1.826841  | 3.096448  | -1.166760 |
| O | 1.107600  | 0.368433  | 3.107913  |
| O | 3.251568  | -3.585897 | 4.563336  |
| O | 4.297083  | -1.590565 | 0.284275  |
| H | 6.502955  | 2.458010  | 0.983232  |
| H | 3.929973  | 4.571373  | -1.705794 |
| H | 1.671377  | -1.604113 | 4.789543  |
| H | 4.557681  | -3.415977 | 2.178847  |
| H | 1.899141  | -4.161582 | -1.746818 |
| H | 4.052710  | -1.271763 | -4.066805 |
| H | -2.007195 | -4.111834 | 2.595822  |
| H | -1.538186 | -0.367222 | 4.615903  |
| H | -5.872376 | 1.628114  | 2.584815  |
| H | -4.343928 | 4.406034  | -0.275499 |
| H | -5.982907 | -2.098213 | -2.539207 |
| H | -2.100141 | -3.447584 | -3.698435 |
| H | -0.566345 | 0.625224  | -4.613113 |
| H | -1.149415 | 2.254339  | -4.259165 |
| H | -2.686678 | 1.105438  | -5.910163 |
| H | -2.964251 | -0.197443 | -4.721616 |
| H | -3.534218 | 1.441223  | -4.378063 |
| H | -0.574055 | 4.040431  | 2.266471  |
| H | -1.937001 | 4.426217  | 1.173069  |
| H | -0.205985 | 6.270449  | 1.171642  |
| H | 1.031000  | 5.091767  | 0.671466  |
| H | -5.134094 | -1.781722 | 2.954795  |
| H | -5.127504 | -0.156861 | 3.695424  |
| H | -6.316948 | -0.546579 | 2.413043  |
| H | -2.143636 | 3.928620  | -2.890020 |
| H | -3.847961 | 4.117415  | -2.389503 |
| H | -2.534285 | 4.809647  | -1.388328 |
| H | -6.860017 | 5.888275  | 1.810619  |
| H | -5.136960 | 5.851952  | 1.327794  |
| H | -6.400611 | 5.303823  | 0.182524  |
| H | 0.735790  | -1.390015 | -3.543155 |
| H | 0.069960  | -3.039523 | -3.705423 |
| H | -0.838643 | -1.643205 | -4.352858 |
| H | -4.713779 | -5.294115 | -5.356277 |
| H | -3.392980 | -4.094912 | -5.506988 |
| H | -3.352758 | -5.313600 | -4.195027 |
| H | -6.894106 | 0.383715  | -0.280976 |
| H | -6.928396 | -0.244164 | -1.956561 |
| H | -6.811763 | -1.382859 | -0.576438 |
| C | 5.921990  | 0.517501  | 2.354052  |
| H | 5.769748  | -0.314495 | 3.043525  |
| H | 6.621305  | 0.223493  | 1.561380  |
| H | 6.317455  | 1.383786  | 2.899169  |
| C | 6.315044  | 5.385690  | -1.656413 |
| H | 7.298125  | 5.853259  | -1.724111 |

|   |           |           |           |
|---|-----------|-----------|-----------|
| H | 6.012175  | 5.015289  | -2.644426 |
| H | 5.581291  | 6.117807  | -1.295797 |
| C | 1.610766  | 3.960830  | -2.283276 |
| H | 0.555122  | 3.846721  | -2.520024 |
| H | 1.832395  | 5.004019  | -2.022934 |
| H | 2.213798  | 3.638673  | -3.138657 |
| C | 0.841666  | -3.712971 | 0.452875  |
| H | 0.323845  | -3.645788 | 1.408116  |
| H | 0.239654  | -4.285966 | -0.258478 |
| H | 1.831102  | -4.167638 | 0.586492  |
| C | 4.214253  | -3.623760 | -4.900998 |
| H | 4.370399  | -4.592421 | -5.377509 |
| H | 3.693877  | -2.950177 | -5.593766 |
| H | 5.183181  | -3.189646 | -4.621147 |
| C | 4.294698  | 1.094807  | -3.609901 |
| H | 4.508115  | 2.158610  | -3.495835 |
| H | 5.231645  | 0.525855  | -3.547245 |
| H | 3.806043  | 0.911958  | -4.575398 |
| C | 5.216147  | -2.636360 | -0.033728 |
| H | 5.641294  | -2.352986 | -0.997007 |
| H | 6.012865  | -2.709362 | 0.718883  |
| H | 4.697270  | -3.597298 | -0.132427 |
| C | 1.141584  | 0.924298  | 4.423792  |
| H | 0.772516  | 1.943095  | 4.307888  |
| H | 0.497269  | 0.364146  | 5.112206  |
| H | 2.169186  | 0.937586  | 4.805737  |
| C | 4.124226  | -4.688976 | 4.303690  |
| H | 4.061093  | -5.324311 | 5.188038  |
| H | 3.797674  | -5.250938 | 3.419268  |
| H | 5.160829  | -4.352915 | 4.166359  |
| H | -0.310606 | 5.503071  | -0.426871 |
| H | -2.950243 | -4.557216 | -0.814053 |
| H | -2.068396 | -5.112111 | 0.644154  |
| H | -3.635898 | -4.261409 | 0.814890  |
| H | -2.461212 | 2.767170  | 3.154267  |
| H | -3.113079 | 1.276283  | 3.868449  |
| H | -1.517164 | 1.891633  | 4.398566  |
| H | -1.618936 | -3.137788 | 6.913611  |
| H | -0.651270 | -1.832006 | 6.166668  |
| H | -2.431159 | -1.670127 | 6.288300  |
| H | -5.134094 | -1.781722 | 2.954795  |
| H | -5.127504 | -0.156861 | 3.695424  |
| H | -6.316948 | -0.546579 | 2.413043  |
| H | -2.143636 | 3.928620  | -2.890020 |
| H | -3.847961 | 4.117415  | -2.389503 |
| H | -2.534285 | 4.809647  | -1.388328 |
| H | -6.860017 | 5.888275  | 1.810619  |
| H | -5.136960 | 5.851952  | 1.327794  |
| H | -6.400611 | 5.303823  | 0.182524  |
| H | 0.735790  | -1.390015 | -3.543155 |
| H | 0.069960  | -3.039523 | -3.705423 |
| H | -0.838643 | -1.643205 | -4.352858 |
| H | -4.713779 | -5.294115 | -5.356277 |
| H | -3.392980 | -4.094912 | -5.506988 |
| H | -3.352758 | -5.313600 | -4.195027 |

|   |           |           |           |
|---|-----------|-----------|-----------|
| H | -6.894106 | 0.383715  | -0.280976 |
| H | -6.928396 | -0.244164 | -1.956561 |
| H | -6.811763 | -1.382859 | -0.576438 |
| C | 5.921990  | 0.517501  | 2.354052  |
| H | 5.769748  | -0.314495 | 3.043525  |
| H | 6.621305  | 0.223493  | 1.561380  |
| H | 6.317455  | 1.383786  | 2.899169  |
| C | 6.315044  | 5.385690  | -1.656413 |
| H | 7.298125  | 5.853259  | -1.724111 |
| H | 6.012175  | 5.015289  | -2.644426 |
| H | 5.581291  | 6.117807  | -1.295797 |
| C | 1.610766  | 3.960830  | -2.283276 |
| H | 0.555122  | 3.846721  | -2.520024 |
| H | 1.832395  | 5.004019  | -2.022934 |
| H | 2.213798  | 3.638673  | -3.138657 |
| C | 0.841666  | -3.712971 | 0.452875  |
| H | 0.323845  | -3.645788 | 1.408116  |
| H | 0.239654  | -4.285966 | -0.258478 |
| H | 1.831102  | -4.167638 | 0.586492  |
| C | 4.214253  | -3.623760 | -4.900998 |
| H | 4.370399  | -4.592421 | -5.377509 |
| H | 3.693877  | -2.950177 | -5.593766 |
| H | 5.183181  | -3.189646 | -4.621147 |
| C | 4.294698  | 1.094807  | -3.609901 |
| H | 4.508115  | 2.158610  | -3.495835 |
| H | 5.231645  | 0.525855  | -3.547245 |
| H | 3.806043  | 0.911958  | -4.575398 |
| C | 5.216147  | -2.636360 | -0.033728 |
| H | 5.641294  | -2.352986 | -0.997007 |
| H | 6.012865  | -2.709362 | 0.718883  |
| H | 4.697270  | -3.597298 | -0.132427 |
| C | 1.141584  | 0.924298  | 4.423792  |
| H | 0.772516  | 1.943095  | 4.307888  |
| H | 0.497269  | 0.364146  | 5.112206  |
| H | 2.169186  | 0.937586  | 4.805737  |
| C | 4.124226  | -4.688976 | 4.303690  |
| H | 4.061093  | -5.324311 | 5.188038  |
| H | 3.797674  | -5.250938 | 3.419268  |
| H | 5.160829  | -4.352915 | 4.166359  |

# 85. FLP<sub>7</sub> - Linker. Acid R = H. Base R = CN

$E_{elec} = -3232.965544$  a.u.;  $H = -3232.204004$  a.u

|   |           |           |           |
|---|-----------|-----------|-----------|
| C | -4.497070 | 1.566016  | 3.739477  |
| C | -5.342186 | 0.974934  | 2.799372  |
| C | -4.846126 | 0.546461  | 1.565286  |
| C | -3.494959 | 0.697030  | 1.210409  |
| C | -2.676249 | 1.303366  | 2.178337  |
| C | -3.147685 | 1.728311  | 3.419949  |
| B | -2.922007 | 0.216412  | -0.249602 |
| C | -3.863883 | -0.940264 | -0.906949 |
| C | -5.066978 | -0.550965 | -1.531291 |
| C | -5.955322 | -1.473203 | -2.087984 |
| C | -5.666197 | -2.837708 | -2.045588 |
| C | -4.483531 | -3.256056 | -1.434418 |
| C | -3.610407 | -2.321191 | -0.873683 |

|   |           |           |           |
|---|-----------|-----------|-----------|
| N | -1.387788 | -0.440038 | 0.086799  |
| C | -1.108887 | -1.279015 | 1.117776  |
| O | -2.161782 | -1.651430 | 1.819542  |
| C | -1.918984 | -2.313277 | 3.103163  |
| C | -3.267773 | -2.402112 | 3.785572  |
| N | -0.245328 | -0.301099 | -0.746865 |
| C | -0.153017 | -0.966541 | -1.992465 |
| O | -1.289702 | -1.359894 | -2.468143 |
| C | -1.312957 | -1.950961 | -3.828080 |
| C | -0.960684 | -3.422692 | -3.780753 |
| P | 1.355470  | -0.113490 | -0.151129 |
| C | 1.337074  | 0.506750  | 1.594241  |
| C | 0.781969  | 1.775442  | 1.881670  |
| C | 0.635184  | 2.224903  | 3.209289  |
| C | 1.087859  | 1.450210  | 4.270349  |
| C | 1.736726  | 0.235306  | 4.001012  |
| C | 1.856524  | -0.230575 | 2.693818  |
| C | 0.409456  | 2.747866  | 0.903236  |
| C | 2.584306  | -1.454252 | 2.566889  |
| C | 0.921908  | 1.897409  | 5.616982  |
| C | 2.446764  | -1.594772 | -0.393649 |
| C | 3.819008  | -1.462245 | -0.738236 |
| C | 4.701848  | -2.550328 | -0.645992 |
| C | 4.235097  | -3.818000 | -0.306048 |
| C | 2.856652  | -4.009010 | -0.188327 |
| C | 1.971306  | -2.927848 | -0.250900 |
| C | 4.424954  | -0.321021 | -1.351228 |
| C | 0.602337  | -3.340379 | -0.296866 |
| C | 5.137998  | -4.915518 | -0.167355 |
| C | 2.111524  | 1.384147  | -0.954007 |
| C | 1.626237  | 2.023737  | -2.121961 |
| C | 2.090670  | 3.300364  | -2.487746 |
| C | 3.060042  | 3.962953  | -1.738504 |
| C | 3.606898  | 3.327056  | -0.620975 |
| C | 3.140267  | 2.068597  | -0.240622 |
| C | 0.673230  | 1.523173  | -3.058190 |
| C | 3.839717  | 1.488863  | 0.865484  |
| C | 3.501373  | 5.268504  | -2.115050 |
| O | 0.980156  | -1.063995 | -2.478235 |
| O | 0.063860  | -1.636647 | 1.398729  |
| C | -2.741660 | 1.489653  | -1.260328 |
| C | -2.572332 | 2.803171  | -0.789870 |
| C | -2.495722 | 3.904531  | -1.647720 |
| C | -2.616371 | 3.728157  | -3.024959 |
| C | -2.810657 | 2.440755  | -3.526466 |
| C | -2.866635 | 1.350855  | -2.655741 |
| H | 5.750146  | -2.391298 | -0.871744 |
| H | 2.451676  | -5.004779 | -0.049251 |
| H | 1.667899  | 3.769694  | -3.368529 |
| H | 4.397814  | 3.797528  | -0.048570 |
| H | 0.167126  | 3.186506  | 3.385563  |
| H | 2.150917  | -0.354146 | 4.810832  |
| H | -2.527683 | 2.981826  | 0.280454  |
| H | -3.038408 | 0.364011  | -3.072706 |
| H | -2.354315 | 4.899684  | -1.233565 |

|   |           |           |           |
|---|-----------|-----------|-----------|
| H | -2.911258 | 2.281273  | -4.596990 |
| H | -2.574160 | 4.581805  | -3.697265 |
| H | -5.309280 | 0.508080  | -1.595206 |
| H | -2.698092 | -2.695378 | -0.422188 |
| H | -6.870713 | -1.123640 | -2.560636 |
| H | -4.236585 | -4.315130 | -1.390152 |
| H | -6.350151 | -3.561739 | -2.481767 |
| H | -5.527863 | 0.065789  | 0.869369  |
| H | -1.620103 | 1.420664  | 1.957445  |
| H | -6.395778 | 0.835920  | 3.031710  |
| H | -2.469541 | 2.183759  | 4.140302  |
| H | -4.880361 | 1.891473  | 4.703043  |
| H | -1.204779 | -1.705717 | 3.668013  |
| H | -1.473596 | -3.291600 | 2.899763  |
| H | -3.150355 | -2.886432 | 4.760802  |
| H | -3.687549 | -1.402797 | 3.929662  |
| H | -3.964554 | -2.990506 | 3.182317  |
| H | -0.637476 | -1.358537 | -4.447948 |
| H | -2.347859 | -1.782462 | -4.126333 |
| H | -1.092933 | -3.842560 | -4.784118 |
| H | 0.079199  | -3.570375 | -3.478542 |
| H | -1.615821 | -3.953004 | -3.086242 |
| N | 5.871656  | -5.809234 | -0.056153 |
| N | 5.016217  | 0.482712  | -1.947815 |
| N | -0.415487 | -3.875121 | -0.472708 |
| N | 3.227429  | -2.421072 | 2.585971  |
| N | 0.782207  | 2.255618  | 6.713180  |
| N | 0.175880  | 3.664556  | 0.227886  |
| N | 4.489246  | 1.063763  | 1.731394  |
| N | 3.863748  | 6.330105  | -2.416449 |
| N | -0.022320 | 1.263319  | -3.952362 |

**86. FLP<sub>8</sub> - Linker. Acid R = H. Base R = CF<sub>3</sub>**

**E<sub>elec</sub> = -4063.563250 a.u.; H = -4062.800833 a.u**

|   |           |           |           |
|---|-----------|-----------|-----------|
| C | 4.102113  | -0.476297 | -3.213910 |
| C | 3.641795  | -1.026451 | -2.002227 |
| C | 3.362626  | -2.405520 | -2.030873 |
| C | 3.472724  | -3.172661 | -3.192089 |
| C | 3.890830  | -2.583291 | -4.384249 |
| C | 4.217952  | -1.226051 | -4.385130 |
| B | 3.594288  | -0.145555 | -0.619540 |
| N | 2.038238  | 0.541697  | -0.344614 |
| N | 0.831021  | 0.284740  | -1.057697 |
| P | -0.695616 | 0.191875  | -0.266427 |
| C | -1.706468 | -1.414046 | -0.726484 |
| C | -1.508551 | -2.296108 | -1.848646 |
| C | -2.246975 | -3.476642 | -1.955961 |
| C | -3.135848 | -3.897067 | -0.981855 |
| C | -3.344310 | -3.086079 | 0.106310  |
| C | -2.682895 | -1.856972 | 0.217131  |
| C | -0.605699 | -2.173161 | -3.106186 |
| F | -0.330352 | -3.415122 | -3.605909 |
| C | -3.832552 | -5.229679 | -1.124983 |
| F | -4.308341 | -5.405489 | -2.383084 |
| C | -3.223918 | -1.136343 | 1.449711  |

|   |           |           |           |
|---|-----------|-----------|-----------|
| F | -4.565081 | -1.296379 | 1.562219  |
| H | 3.071350  | -2.904992 | -1.113952 |
| H | 4.392209  | 0.570388  | -3.236766 |
| C | 3.984171  | -1.054976 | 0.683206  |
| C | 5.013509  | -2.012556 | 0.551051  |
| C | 5.491976  | -2.760983 | 1.626900  |
| C | 4.960317  | -2.575942 | 2.903612  |
| C | 3.948436  | -1.633347 | 3.075222  |
| C | 3.477229  | -0.897562 | 1.984444  |
| C | 4.604399  | 1.141256  | -0.745851 |
| C | 5.907121  | 1.094637  | -0.220988 |
| C | 6.802697  | 2.158544  | -0.355760 |
| C | 6.422382  | 3.322623  | -1.023692 |
| C | 5.134198  | 3.400473  | -1.556507 |
| C | 4.253827  | 2.327411  | -1.417755 |
| C | 1.799522  | 1.511042  | 0.578374  |
| O | 0.640389  | 1.918269  | 0.844243  |
| O | 2.878679  | 1.957464  | 1.195961  |
| C | 2.713790  | 2.928513  | 2.277387  |
| C | 4.107774  | 3.437598  | 2.582189  |
| C | 0.609843  | 0.746057  | -2.361849 |
| O | -0.564349 | 0.770567  | -2.743468 |
| O | 1.681087  | 1.070589  | -3.027174 |
| C | 1.530135  | 1.422333  | -4.453441 |
| C | 2.325903  | 2.685781  | -4.705773 |
| C | -0.287072 | -0.375341 | 1.539012  |
| C | 0.308212  | -1.654324 | 1.757517  |
| C | 0.636733  | -2.104295 | 3.045418  |
| C | 0.429289  | -1.319132 | 4.154657  |
| C | -0.133946 | -0.068001 | 3.977286  |
| C | -0.507369 | 0.402529  | 2.718983  |
| C | 0.652041  | -2.752493 | 0.752376  |
| F | 1.753407  | -3.441609 | 1.115759  |
| C | 0.801417  | -1.779760 | 5.542867  |
| F | -0.283859 | -1.796077 | 6.360899  |
| C | -1.196286 | 1.756184  | 2.935367  |
| F | -0.331054 | 2.643063  | 3.493141  |
| C | -1.825795 | 1.723645  | -0.718017 |
| C | -3.227991 | 1.566593  | -0.970351 |
| C | -4.133132 | 2.572547  | -0.623537 |
| C | -3.699219 | 3.809468  | -0.182834 |
| C | -2.352869 | 4.087911  | -0.321604 |
| C | -1.415220 | 3.090763  | -0.619328 |
| C | -3.939595 | 0.493042  | -1.800740 |
| F | -4.860424 | 1.104951  | -2.600803 |
| C | -4.666263 | 4.844058  | 0.332454  |
| F | -4.248653 | 6.105919  | 0.065713  |
| C | -0.094098 | 3.800818  | -0.950117 |
| F | 0.390711  | 4.518339  | 0.090138  |
| F | -0.360838 | -3.675077 | 0.701046  |
| F | 0.871192  | -2.317416 | -0.494538 |
| F | -1.755133 | 2.354307  | 1.881969  |
| F | -2.204942 | 1.590217  | 3.847170  |
| F | 1.336354  | -3.020300 | 5.547666  |
| F | 1.707845  | -0.938281 | 6.109070  |



|   |           |           |           |
|---|-----------|-----------|-----------|
| F | -3.137241 | -0.183207 | -2.632415 |
| F | -4.650837 | -0.403195 | -1.060266 |
| F | 0.908668  | 3.073887  | -1.462499 |
| F | -0.386927 | 4.720220  | -1.930259 |
| F | -5.901624 | 4.696938  | -0.207708 |
| F | -4.806828 | 4.746202  | 1.681888  |
| F | -1.260187 | -1.514745 | -4.092810 |
| F | 0.596525  | -1.614362 | -2.939935 |
| F | -2.695015 | -1.634097 | 2.598576  |
| F | -3.019429 | 0.201176  | 1.437648  |
| F | -2.978311 | -6.255504 | -0.873985 |
| F | -4.874974 | -5.352251 | -0.269506 |
| H | -5.193009 | 2.387980  | -0.753169 |
| H | -1.999506 | 5.104580  | -0.194105 |
| H | -2.105629 | -4.103120 | -2.825429 |
| H | -4.050960 | -3.377849 | 0.872900  |
| H | 1.092057  | -3.078939 | 3.155703  |
| H | -0.314983 | 0.562282  | 4.840605  |
| H | 3.237906  | -4.234510 | -3.161930 |
| H | 4.584893  | -0.754742 | -5.295240 |
| H | 3.984135  | -3.175648 | -5.291343 |
| H | 6.232186  | 0.210569  | 0.321059  |
| H | 3.255237  | 2.423499  | -1.828949 |
| H | 7.801001  | 2.077947  | 0.069430  |
| H | 4.812836  | 4.300166  | -2.078621 |
| H | 7.115335  | 4.154217  | -1.125901 |
| H | 5.456225  | -2.174269 | -0.428559 |
| H | 2.689709  | -0.175549 | 2.175409  |
| H | 6.285046  | -3.488050 | 1.466818  |
| H | 3.531879  | -1.461082 | 4.065293  |
| H | 5.330683  | -3.150673 | 3.748703  |
| H | 2.260574  | 2.409475  | 3.127580  |
| H | 2.034324  | 3.714001  | 1.939529  |
| H | 4.057643  | 4.175778  | 3.389664  |
| H | 4.756863  | 2.614672  | 2.893427  |
| H | 4.546572  | 3.904744  | 1.696241  |
| H | 0.465404  | 1.535486  | -4.664862 |
| H | 1.932428  | 0.558935  | -4.988660 |
| H | 2.273390  | 2.929957  | -5.772249 |
| H | 1.918133  | 3.525307  | -4.135721 |
| H | 3.374409  | 2.547461  | -4.430188 |

**87. FLP<sub>11</sub> - Linker. Acid R = H. Base R = NH<sub>2</sub>**

**E<sub>elec</sub>** = -2900.958576 a.u.; **H** = -2900.037332 a.u

|   |           |           |           |
|---|-----------|-----------|-----------|
| C | -3.462779 | -3.740049 | 2.078771  |
| C | -2.708687 | -2.977056 | 2.969130  |
| C | -2.325906 | -1.673181 | 2.633636  |
| C | -2.647674 | -1.080807 | 1.398279  |
| C | -3.461491 | -1.861536 | 0.547288  |
| C | -3.854320 | -3.161742 | 0.866807  |
| B | -2.167559 | 0.432611  | 0.938803  |
| C | -3.470883 | 1.259973  | 0.383733  |
| C | -4.721304 | 1.037440  | 0.992307  |
| C | -5.870217 | 1.746232  | 0.632961  |
| C | -5.812998 | 2.716666  | -0.367468 |

|   |           |           |           |
|---|-----------|-----------|-----------|
| C | -4.587549 | 2.969187  | -0.986576 |
| C | -3.446728 | 2.258931  | -0.607608 |
| N | -1.017171 | 0.315189  | -0.299782 |
| C | -1.358513 | 0.348920  | -1.630440 |
| O | -2.542327 | -0.246618 | -1.845459 |
| C | -3.116002 | -0.058060 | -3.167441 |
| C | -4.514092 | -0.641919 | -3.110622 |
| N | 0.339277  | 0.711004  | -0.092373 |
| C | 0.580267  | 2.065052  | 0.168945  |
| O | -0.471656 | 2.823552  | -0.144073 |
| C | -0.406525 | 4.214055  | 0.293989  |
| C | 0.362034  | 5.065553  | -0.703316 |
| P | 1.639708  | -0.449324 | -0.497475 |
| C | 0.813072  | -1.618624 | -1.575705 |
| C | -0.222083 | -2.487488 | -1.053751 |
| C | -1.059342 | -3.190853 | -1.922395 |
| C | -0.908306 | -3.088221 | -3.306534 |
| C | 0.138156  | -2.326225 | -3.835299 |
| C | 0.996627  | -1.601153 | -3.005535 |
| N | -0.375561 | -2.726876 | 0.286543  |
| N | 2.044749  | -0.943847 | -3.610003 |
| N | -1.821674 | -3.701740 | -4.152797 |
| C | 2.990545  | 0.499368  | -1.188743 |
| C | 4.349096  | 0.112598  | -0.868644 |
| C | 5.372090  | 1.063222  | -0.877616 |
| C | 5.131835  | 2.371872  | -1.311764 |
| C | 3.880901  | 2.708058  | -1.833507 |
| C | 2.823882  | 1.791693  | -1.824451 |
| N | 4.701281  | -1.189598 | -0.631512 |
| N | 1.666948  | 2.132408  | -2.449636 |
| N | 6.172147  | 3.292223  | -1.346625 |
| C | 2.226131  | -1.337260 | 0.953063  |
| C | 2.577555  | -0.654381 | 2.172799  |
| C | 2.751346  | -1.381922 | 3.362503  |
| C | 2.742960  | -2.774372 | 3.363052  |
| C | 2.650602  | -3.455620 | 2.137883  |
| C | 2.444495  | -2.763122 | 0.951166  |
| N | 2.813459  | 0.684124  | 2.210978  |
| N | 2.623215  | -3.469643 | -0.240965 |
| N | 2.824616  | -3.486070 | 4.548230  |
| O | 1.626295  | 2.510088  | 0.627978  |
| O | -0.698462 | 0.830794  | -2.560555 |
| C | -1.496547 | 1.241891  | 2.192995  |
| C | -0.384777 | 0.754228  | 2.905352  |
| C | 0.117285  | 1.388375  | 4.043028  |
| C | -0.468114 | 2.565957  | 4.506522  |
| C | -1.562452 | 3.088763  | 3.815711  |
| C | -2.063865 | 2.431586  | 2.690494  |
| H | 6.385005  | 0.750668  | -0.634244 |
| H | 3.721124  | 3.687822  | -2.278158 |
| H | 2.945579  | -0.835896 | 4.283000  |
| H | 2.768508  | -4.536432 | 2.105794  |
| H | -1.862741 | -3.786534 | -1.497219 |
| H | 0.293541  | -2.284886 | -4.910982 |
| H | -0.034359 | -2.037996 | 0.945266  |

|   |           |           |           |
|---|-----------|-----------|-----------|
| H | -1.282009 | -3.092981 | 0.560053  |
| H | -2.353301 | -4.467333 | -3.758251 |
| H | 1.891623  | -0.653101 | -4.565918 |
| H | 2.583689  | -0.291181 | -3.050787 |
| H | 2.059124  | -3.144268 | -1.026346 |
| H | 2.558967  | -4.475348 | -0.126365 |
| H | 3.140957  | -4.444842 | 4.484443  |
| H | 3.187053  | -2.991921 | 5.353254  |
| H | 2.489679  | 1.313289  | 1.465636  |
| H | 2.765652  | 1.115547  | 3.125137  |
| H | 0.802439  | 1.564497  | -2.433819 |
| H | 1.547273  | 3.101990  | -2.704936 |
| H | 6.931660  | 3.123562  | -0.698977 |
| H | 5.897991  | 4.265978  | -1.384653 |
| H | 4.033607  | -1.953001 | -0.609071 |
| H | 5.561568  | -1.361096 | -0.131226 |
| H | 0.101529  | -0.158961 | 2.571993  |
| H | -2.927777 | 2.852463  | 2.182888  |
| H | 0.953117  | 0.946141  | 4.583075  |
| H | -2.035611 | 4.005951  | 4.160850  |
| H | -0.083717 | 3.063429  | 5.393901  |
| H | -4.799686 | 0.283765  | 1.772485  |
| H | -2.512929 | 2.484585  | -1.113234 |
| H | -6.813097 | 1.535140  | 1.133600  |
| H | -4.518556 | 3.722408  | -1.769808 |
| H | -6.704896 | 3.266499  | -0.658690 |
| H | -1.756788 | -1.108260 | 3.365446  |
| H | -3.782490 | -1.437522 | -0.395156 |
| H | -2.417839 | -3.392370 | 3.931778  |
| H | -4.473813 | -3.725043 | 0.170741  |
| H | -3.759431 | -4.755407 | 2.330821  |
| H | -2.476076 | -0.564072 | -3.896249 |
| H | -3.128482 | 1.013779  | -3.388507 |
| H | -5.006116 | -0.514089 | -4.080990 |
| H | -4.475865 | -1.711651 | -2.881544 |
| H | -5.107354 | -0.133577 | -2.344548 |
| H | 0.041589  | 4.237877  | 1.289757  |
| H | -1.457637 | 4.501139  | 0.359267  |
| H | 0.320663  | 6.116112  | -0.393942 |
| H | 1.409573  | 4.754374  | -0.741470 |
| H | -0.082450 | 4.984944  | -1.701000 |
| H | -1.512454 | -3.876294 | -5.100522 |

**88. FLP<sub>12</sub> - Linker. Acid R = CN. Base R = CN**

**E<sub>elec</sub>** = -4063.563250 a.u.; **H** = -4062.800833 a.u

|   |           |           |           |
|---|-----------|-----------|-----------|
| C | 2.431017  | -0.300796 | 2.757955  |
| C | 2.284878  | 0.573119  | 1.636206  |
| C | 2.156990  | 1.935656  | 2.029582  |
| C | 2.184274  | 2.377616  | 3.365388  |
| C | 2.304920  | 1.474504  | 4.415095  |
| C | 2.420903  | 0.126289  | 4.097117  |
| B | 2.328442  | -0.021973 | 0.054022  |
| N | 0.758840  | -0.284955 | -0.427500 |
| N | -0.386856 | -0.619235 | 0.396815  |
| P | -1.983420 | -0.174383 | -0.269619 |

|   |           |           |           |
|---|-----------|-----------|-----------|
| C | -2.977326 | 0.158447  | 1.342105  |
| C | -2.571555 | -0.020983 | 2.686511  |
| C | -3.380760 | 0.370416  | 3.763449  |
| C | -4.625483 | 0.964282  | 3.554060  |
| C | -5.066231 | 1.152444  | 2.244959  |
| C | -4.260312 | 0.754435  | 1.170666  |
| C | -1.346723 | -0.604628 | 3.135328  |
| C | -5.438685 | 1.364400  | 4.658476  |
| C | -4.892199 | 0.912024  | -0.104908 |
| C | 1.929906  | 3.068847  | 1.184613  |
| N | 1.693516  | 4.099751  | 0.699586  |
| C | 2.294017  | 1.916064  | 5.773781  |
| N | 2.276111  | 2.274285  | 6.878764  |
| C | 2.676704  | -1.715277 | 2.726735  |
| N | 2.944911  | -2.826812 | 2.941148  |
| C | 3.106006  | 1.010300  | -1.053337 |
| C | 4.386729  | 0.724125  | -1.625062 |
| C | 5.235645  | 1.710799  | -2.154513 |
| C | 4.816998  | 3.038324  | -2.251271 |
| C | 3.476029  | 3.305574  | -1.981106 |
| C | 2.653931  | 2.298129  | -1.453395 |
| C | 5.694137  | 4.059424  | -2.727693 |
| N | 6.406254  | 4.890433  | -3.118020 |
| C | 4.875157  | -0.591188 | -1.929342 |
| N | 5.330969  | -1.554655 | -2.397860 |
| C | 1.267868  | 2.605948  | -1.578798 |
| N | 0.195511  | 2.874629  | -1.934685 |
| C | 3.236943  | -1.392246 | 0.066318  |
| C | 4.519920  | -1.346353 | 0.687834  |
| C | 5.374299  | -2.450191 | 0.769645  |
| C | 4.993158  | -3.664237 | 0.198602  |
| C | 3.775588  | -3.741165 | -0.482962 |
| C | 2.928462  | -2.628051 | -0.550059 |
| C | 5.036635  | -0.130771 | 1.248371  |
| N | 5.521378  | 0.833693  | 1.681468  |
| C | 5.842989  | -4.809673 | 0.285868  |
| N | 6.527345  | -5.745585 | 0.359668  |
| C | 1.738767  | -2.839626 | -1.316884 |
| N | 0.790550  | -3.100107 | -1.937306 |
| C | 0.330358  | -0.203871 | -1.698440 |
| O | -0.934037 | -0.220800 | -1.921997 |
| O | 1.218706  | -0.093242 | -2.637612 |
| C | 0.816187  | 0.316440  | -4.017913 |
| C | 2.098471  | 0.673659  | -4.732906 |
| C | -0.535875 | -1.956687 | 0.878670  |
| O | -1.682862 | -2.364316 | 1.034399  |
| O | 0.558571  | -2.591495 | 1.172875  |
| C | 0.350323  | -3.943750 | 1.796307  |
| C | -0.023429 | -4.993153 | 0.771375  |
| C | -2.180207 | 1.627238  | -0.750682 |
| C | -1.822312 | 2.648303  | 0.165595  |
| C | -1.970312 | 4.007958  | -0.145994 |
| C | -2.526178 | 4.394901  | -1.364173 |
| C | -2.896211 | 3.411194  | -2.281589 |
| C | -2.706101 | 2.053754  | -1.994278 |

|   |           |           |           |
|---|-----------|-----------|-----------|
| C | -1.269218 | 2.423530  | 1.462204  |
| C | -2.701316 | 5.778111  | -1.675798 |
| C | -3.132221 | 1.185329  | -3.043510 |
| C | -3.126681 | -1.471299 | -1.056164 |
| C | -4.195310 | -2.048179 | -0.292030 |
| C | -5.235290 | -2.771423 | -0.889588 |
| C | -5.240509 | -3.024080 | -2.260669 |
| C | -4.124121 | -2.644124 | -2.993569 |
| C | -3.066257 | -1.917867 | -2.409041 |
| C | -4.347814 | -2.088804 | 1.133714  |
| C | -6.327249 | -3.717983 | -2.874732 |
| C | -2.001000 | -1.828114 | -3.361858 |
| H | -6.028958 | -3.153110 | -0.257733 |
| H | -4.041749 | -2.903812 | -4.042258 |
| H | -3.019421 | 0.208341  | 4.772396  |
| H | -6.039443 | 1.587084  | 2.046359  |
| H | -1.637241 | 4.749902  | 0.570519  |
| H | -3.331258 | 3.687748  | -3.235121 |
| H | 2.082750  | 3.437325  | 3.568334  |
| H | 2.512321  | -0.614608 | 4.882479  |
| H | 6.330548  | -2.356261 | 1.271468  |
| H | 3.488445  | -4.664683 | -0.973753 |
| H | 6.215116  | 1.419076  | -2.517047 |
| H | 3.050855  | 4.281256  | -2.187349 |
| H | 0.131818  | 1.160247  | -3.908289 |
| H | 0.303916  | -0.538860 | -4.455676 |
| H | 1.857481  | 0.925085  | -5.770711 |
| H | 2.589358  | 1.535815  | -4.273596 |
| H | 2.789890  | -0.173556 | -4.734996 |
| H | -0.413439 | -3.805445 | 2.562719  |
| H | 1.319122  | -4.122783 | 2.258032  |
| H | -0.154829 | -5.940880 | 1.305734  |
| H | -0.959019 | -4.751344 | 0.263266  |
| H | 0.762278  | -5.126327 | 0.025668  |
| N | -7.214456 | -4.281564 | -3.369082 |
| N | -4.640784 | -2.300604 | 2.239236  |
| N | -1.297996 | -1.983917 | -4.273257 |
| N | -3.520499 | 0.595263  | -3.965275 |
| N | -2.848548 | 6.901721  | -1.930615 |
| N | -0.845072 | 2.377016  | 2.542670  |
| N | -5.512357 | 1.030501  | -1.081685 |
| N | -6.102834 | 1.695164  | 5.552106  |
| N | -0.431755 | -1.077616 | 3.671941  |

**89. FLP<sub>14</sub> - Linker. Acid R = CN. Base R = H**

**E<sub>elec</sub>** = -3233.056996 a.u.; **H** = -3232.293376 a.u

|   |           |           |           |
|---|-----------|-----------|-----------|
| C | 2.198749  | -1.238818 | 2.362298  |
| C | 1.368647  | -0.302625 | 1.693031  |
| C | 0.328358  | 0.224545  | 2.511018  |
| C | 0.043497  | -0.233661 | 3.804741  |
| C | 0.829628  | -1.235608 | 4.375169  |
| C | 1.934356  | -1.703410 | 3.659716  |
| B | 1.492632  | 0.217951  | 0.107252  |
| N | 0.144329  | -0.340184 | -0.657341 |
| N | -1.024689 | -0.724664 | 0.077268  |

|   |           |           |           |
|---|-----------|-----------|-----------|
| P | -2.648255 | -0.212950 | -0.337142 |
| C | -3.581993 | 0.485029  | 1.070298  |
| C | -3.430798 | 0.067446  | 2.401066  |
| C | -4.219698 | 0.618850  | 3.405838  |
| C | -5.184743 | 1.579629  | 3.104388  |
| C | -5.355526 | 1.989721  | 1.784038  |
| C | -4.558909 | 1.454160  | 0.773976  |
| H | -2.702783 | -0.689693 | 2.651817  |
| H | -5.797917 | 2.005980  | 3.893092  |
| H | -4.699351 | 1.803824  | -0.242515 |
| C | 1.507878  | 1.883062  | 0.198359  |
| C | 2.067645  | 2.560890  | 1.322592  |
| C | 1.954940  | 3.938885  | 1.532494  |
| C | 1.291398  | 4.734175  | 0.596778  |
| C | 0.832250  | 4.138034  | -0.577391 |
| C | 0.957484  | 2.753816  | -0.772491 |
| C | 2.867325  | -0.358461 | -0.645109 |
| C | 4.026508  | 0.445883  | -0.835156 |
| C | 5.266287  | -0.062129 | -1.267821 |
| C | 5.406627  | -1.405165 | -1.601995 |
| C | 4.271672  | -2.214355 | -1.549183 |
| C | 3.050783  | -1.702477 | -1.092199 |
| C | 0.029909  | -0.752444 | -1.985743 |
| O | -0.975968 | -1.287774 | -2.436802 |
| O | 1.124080  | -0.489557 | -2.704870 |
| C | 1.184741  | -1.135106 | -4.025863 |
| C | 0.466810  | -0.345215 | -5.104016 |
| C | -1.093094 | -1.933595 | 0.796981  |
| O | -2.158162 | -2.239417 | 1.321619  |
| O | 0.029406  | -2.614294 | 0.850050  |
| C | -0.015650 | -3.880324 | 1.612459  |
| C | -0.728905 | -4.975335 | 0.841741  |
| C | -2.582326 | 1.128096  | -1.534390 |
| C | -2.388999 | 2.450859  | -1.098743 |
| C | -2.536255 | 3.500016  | -2.001432 |
| C | -2.859625 | 3.241217  | -3.333237 |
| C | -3.034256 | 1.927255  | -3.769649 |
| C | -2.905099 | 0.869062  | -2.875517 |
| H | -2.140652 | 2.656283  | -0.062130 |
| H | -2.967266 | 4.063397  | -4.034821 |
| H | -3.047210 | -0.152264 | -3.208662 |
| C | -3.659074 | -1.567331 | -1.014334 |
| C | -5.041567 | -1.337775 | -1.082253 |
| C | -5.890209 | -2.317770 | -1.594156 |
| C | -5.370403 | -3.538552 | -2.021757 |
| C | -3.996768 | -3.772961 | -1.941688 |
| C | -3.139548 | -2.794794 | -1.446104 |
| H | -5.464940 | -0.401823 | -0.733845 |
| H | -6.032623 | -4.305617 | -2.413192 |
| H | -2.074615 | -2.980141 | -1.420128 |
| H | -6.957622 | -2.124907 | -1.647838 |
| H | -3.582982 | -4.721909 | -2.270157 |
| H | -4.077840 | 0.290365  | 4.431546  |
| H | -6.102320 | 2.736879  | 1.532037  |
| H | -2.392756 | 4.521054  | -1.660074 |

|   |           |           |           |
|---|-----------|-----------|-----------|
| H | -3.272348 | 1.723882  | -4.809197 |
| C | -0.480042 | 1.336453  | 2.106137  |
| C | 3.432623  | -1.753239 | 1.844561  |
| H | -0.776515 | 0.205712  | 4.362202  |
| H | 2.606287  | -2.425020 | 4.111336  |
| C | 0.525429  | -1.746304 | 5.674225  |
| C | 4.087856  | 1.875533  | -0.707707 |
| C | 2.019137  | -2.689591 | -1.210505 |
| H | 6.109995  | 0.613470  | -1.354774 |
| H | 4.329368  | -3.253471 | -1.852817 |
| C | 6.662088  | -1.931693 | -2.034661 |
| C | 2.883611  | 1.897787  | 2.297615  |
| C | 0.568086  | 2.351565  | -2.088551 |
| H | 2.394040  | 4.384977  | 2.417707  |
| H | 0.386456  | 4.745386  | -1.357090 |
| C | 1.115918  | 6.135461  | 0.812914  |
| H | 0.776409  | -2.142487 | -3.913886 |
| H | 2.259747  | -1.193727 | -4.212512 |
| H | 0.583189  | -0.879203 | -6.054766 |
| H | -0.597550 | -0.262248 | -4.875258 |
| H | 0.882298  | 0.658453  | -5.203858 |
| H | -0.490452 | -3.667494 | 2.573660  |
| H | 1.042430  | -4.101616 | 1.756841  |
| H | -0.642777 | -5.909636 | 1.407802  |
| H | -1.789139 | -4.740316 | 0.723133  |
| H | -0.266165 | -5.110887 | -0.138067 |
| N | 0.290629  | 2.217922  | -3.208561 |
| N | 0.955611  | 7.273437  | 0.986079  |
| N | 3.604943  | 1.463870  | 3.100411  |
| N | 4.306085  | 3.018035  | -0.727011 |
| N | 7.679252  | -2.362323 | -2.395561 |
| N | 1.310312  | -3.576949 | -1.459722 |
| N | -1.156400 | 2.262624  | 1.915303  |
| N | 4.466670  | -2.223982 | 1.598126  |
| N | 0.259102  | -2.171574 | 6.722524  |

**90. FLP<sub>15</sub> - Linker. Acid R = CF<sub>3</sub>. Base R = H**

**E<sub>elec</sub>** = -5437.283123 a.u.; **H** = -5436.453511 a.u

|   |           |           |           |
|---|-----------|-----------|-----------|
| C | -0.068519 | -1.974823 | 1.190909  |
| C | 0.217021  | -0.565077 | 1.201605  |
| C | 0.188936  | -0.032789 | 2.544319  |
| C | 0.051544  | -0.825399 | 3.685523  |
| C | -0.180733 | -2.184637 | 3.602450  |
| C | -0.275035 | -2.743554 | 2.349655  |
| B | 0.744674  | 0.210487  | -0.284534 |
| C | 1.444478  | 1.825429  | -0.163609 |
| C | 2.857161  | 2.055472  | -0.317843 |
| C | 3.540182  | 3.107446  | 0.302896  |
| C | 2.858789  | 4.132233  | 0.929187  |
| C | 1.486114  | 4.155712  | 0.764309  |
| C | 0.801093  | 3.058847  | 0.231273  |
| C | 2.015063  | -0.972622 | -0.742108 |
| C | 2.892396  | -1.507884 | 0.266265  |
| C | 3.670147  | -2.662676 | 0.115967  |
| C | 3.702845  | -3.349415 | -1.077993 |

|   |           |           |           |
|---|-----------|-----------|-----------|
| C | 3.016336  | -2.795767 | -2.139247 |
| C | 2.225126  | -1.648643 | -1.991932 |
| H | 0.106727  | -0.366618 | 4.662351  |
| H | -0.473201 | -3.803714 | 2.256292  |
| H | 4.266863  | -3.010387 | 0.950784  |
| H | 3.093691  | -3.257419 | -3.116588 |
| H | 4.620850  | 3.145402  | 0.239882  |
| H | 0.929107  | 5.031566  | 1.072301  |
| C | -0.394501 | -2.991226 | 4.852894  |
| C | 0.222771  | 1.446546  | 2.942395  |
| C | -0.134332 | -2.968035 | 0.022914  |
| C | 1.749576  | -1.296162 | -3.399666 |
| C | 4.452298  | -4.643792 | -1.224443 |
| C | 3.237626  | -0.922420 | 1.629573  |
| C | 3.790270  | 1.370483  | -1.316180 |
| C | 3.571101  | 5.217810  | 1.682940  |
| C | -0.636653 | 3.482842  | -0.021730 |
| F | 3.598692  | 4.964490  | 3.022553  |
| F | 4.862005  | 5.361938  | 1.286287  |
| F | 2.964487  | 6.427324  | 1.531017  |
| F | -1.142653 | 4.313713  | 0.934739  |
| F | -1.545225 | 2.495918  | -0.160258 |
| F | -0.704543 | 4.221505  | -1.180171 |
| F | 4.665463  | 2.299324  | -1.826306 |
| F | 3.141746  | 0.896676  | -2.398936 |
| F | 4.588204  | 0.387449  | -0.822481 |
| F | 2.842300  | 0.338938  | 1.848341  |
| F | 2.751177  | -1.691261 | 2.654806  |
| F | 4.593778  | -0.908453 | 1.808924  |
| F | 5.485248  | -4.742318 | -0.348742 |
| F | 4.962896  | -4.801686 | -2.474120 |
| F | 3.642371  | -5.718770 | -0.996746 |
| F | 2.838704  | -1.129615 | -4.218036 |
| F | 1.058189  | -2.347388 | -3.955062 |
| F | 1.003098  | -0.204370 | -3.570576 |
| F | 1.407299  | 2.075006  | 2.810670  |
| F | -0.116743 | 1.632770  | 4.256681  |
| F | -0.709835 | 2.142328  | 2.252861  |
| F | -1.636872 | -2.756526 | 5.382759  |
| F | 0.500455  | -2.675675 | 5.822116  |
| F | -0.309943 | -4.324948 | 4.633441  |
| F | -1.243997 | -3.774232 | 0.164976  |
| F | -0.213565 | -2.495308 | -1.224980 |
| F | 0.922419  | -3.826368 | 0.061942  |
| N | -0.591307 | 0.332940  | -1.252657 |
| N | -1.820898 | -0.404909 | -1.160824 |
| C | -0.723817 | 1.263658  | -2.293824 |
| C | -2.286663 | -0.988592 | -2.366938 |
| O | -1.741229 | 1.404221  | -2.963350 |
| O | 0.383980  | 1.988786  | -2.483387 |
| O | -3.501142 | -1.183304 | -2.456389 |
| O | -1.389215 | -1.348904 | -3.247081 |
| C | 0.365582  | 2.876662  | -3.645591 |
| C | -1.919880 | -1.832147 | -4.536472 |
| C | 1.626260  | 3.715050  | -3.581264 |



|   |           |           |           |
|---|-----------|-----------|-----------|
| H | -0.542688 | 3.480958  | -3.600759 |
| H | 0.327676  | 2.246732  | -4.539806 |
| C | -2.232541 | -0.657764 | -5.444503 |
| H | -2.799069 | -2.446624 | -4.330952 |
| H | -1.108070 | -2.449813 | -4.916692 |
| H | 1.633572  | 4.415204  | -4.423450 |
| H | 1.659535  | 4.290641  | -2.652060 |
| H | 2.519753  | 3.090099  | -3.641498 |
| H | -2.576658 | -1.039904 | -6.412262 |
| H | -3.013592 | -0.028218 | -5.012399 |
| H | -1.339821 | -0.047689 | -5.602587 |
| P | -3.405426 | -0.005562 | -0.373085 |
| C | -4.289919 | -1.520593 | 0.155558  |
| C | -3.240389 | 0.763487  | 1.265179  |
| C | -4.552922 | 1.039951  | -1.328796 |
| C | -3.968774 | -2.819394 | -0.245521 |
| C | -5.370422 | -1.319508 | 1.034805  |
| C | -2.899510 | -0.068014 | 2.345537  |
| C | -3.741935 | 2.047648  | 1.526088  |
| C | -5.803759 | 0.503602  | -1.671805 |
| C | -4.232461 | 2.346530  | -1.722686 |
| C | -4.695897 | -3.903300 | 0.245416  |
| C | -6.116488 | -2.402415 | 1.489923  |
| C | -3.053280 | 0.378402  | 3.653387  |
| C | -3.880573 | 2.493901  | 2.837936  |
| C | -6.731711 | 1.277773  | -2.362990 |
| C | -5.165679 | 3.111478  | -2.419534 |
| C | -5.773291 | -3.699868 | 1.105521  |
| H | -4.416171 | -4.908462 | -0.055670 |
| H | -6.956047 | -2.230106 | 2.156978  |
| C | -3.543385 | 1.660303  | 3.903106  |
| H | -2.789268 | -0.280012 | 4.474905  |
| H | -4.262225 | 3.493484  | 3.022813  |
| C | -6.418293 | 2.585798  | -2.734111 |
| H | -7.695782 | 0.849737  | -2.622310 |
| H | -4.901823 | 4.120202  | -2.723660 |
| H | -7.141639 | 3.186742  | -3.278121 |
| H | -6.044633 | -0.522182 | -1.417415 |
| H | -3.254510 | 2.759331  | -1.524371 |
| H | -5.630984 | -0.317544 | 1.361451  |
| H | -6.343141 | -4.546929 | 1.476816  |
| H | -3.153050 | -3.000105 | -0.927757 |
| H | -3.662195 | 2.006759  | 4.925627  |
| H | -4.039412 | 2.697129  | 0.712782  |
| H | -2.544016 | -1.077287 | 2.166611  |

**91. FLP<sub>16</sub> - Linker. Acid R = CN. Base R = NH<sub>2</sub>**

**E<sub>elec</sub>** = -3731.556547 a.u.; **H** = -3730.634232 a.u

|   |           |           |           |
|---|-----------|-----------|-----------|
| C | -4.497985 | -3.415922 | -1.172448 |
| C | -5.033602 | -2.240655 | -0.656092 |
| C | -4.224334 | -1.103485 | -0.470140 |
| C | -2.808654 | -1.091166 | -0.675180 |
| C | -2.377621 | -2.246102 | -1.401760 |
| C | -3.178513 | -3.375615 | -1.620181 |
| B | -1.820107 | 0.104808  | -0.010642 |

|   |           |           |           |
|---|-----------|-----------|-----------|
| C | -2.749704 | 1.503532  | 0.217415  |
| C | -3.482685 | 1.673655  | 1.437523  |
| C | -4.163089 | 2.841326  | 1.798156  |
| C | -4.201731 | 3.923360  | 0.922304  |
| C | -3.618348 | 3.768686  | -0.332971 |
| C | -2.926709 | 2.592613  | -0.679183 |
| N | -0.448685 | 0.324934  | -0.893180 |
| C | -0.490515 | 0.366334  | -2.277427 |
| O | -1.735199 | 0.175846  | -2.734193 |
| C | -1.877479 | 0.101212  | -4.191830 |
| C | -3.332022 | -0.227281 | -4.457716 |
| N | 0.792614  | 0.836493  | -0.354908 |
| C | 0.949619  | 2.239503  | -0.360447 |
| O | 0.001344  | 2.881812  | -1.035375 |
| C | 0.071870  | 4.350595  | -0.970208 |
| C | 1.041453  | 4.897693  | -2.000046 |
| P | 2.390707  | -0.150897 | -0.306686 |
| C | 2.165447  | -1.588762 | -1.335186 |
| C | 1.453412  | -2.728012 | -0.808130 |
| C | 1.623650  | -4.000616 | -1.341484 |
| C | 2.435100  | -4.202571 | -2.464148 |
| C | 3.070571  | -3.107888 | -3.050185 |
| C | 2.926194  | -1.809001 | -2.544478 |
| N | 0.546965  | -2.587727 | 0.217540  |
| N | 3.600090  | -0.812743 | -3.196210 |
| N | 2.620624  | -5.478730 | -2.965800 |
| C | 3.751372  | 0.932008  | -0.758991 |
| C | 4.972914  | 0.939156  | 0.019801  |
| C | 5.850169  | 2.027419  | -0.050052 |
| C | 5.639874  | 3.088938  | -0.930971 |
| C | 4.559501  | 3.023510  | -1.814138 |
| C | 3.645682  | 1.973060  | -1.752285 |
| N | 5.346345  | -0.084458 | 0.857215  |
| N | 2.676330  | 1.934747  | -2.722655 |
| N | 6.549639  | 4.129986  | -1.009178 |
| C | 2.656201  | -0.767806 | 1.369581  |
| C | 2.494012  | 0.055961  | 2.540442  |
| C | 2.596155  | -0.496389 | 3.829037  |
| C | 2.938823  | -1.832761 | 4.022792  |
| C | 3.302299  | -2.596689 | 2.899265  |
| C | 3.254725  | -2.061572 | 1.617533  |
| N | 2.227177  | 1.381035  | 2.455801  |
| N | 3.992903  | -2.745294 | 0.645617  |
| N | 3.031657  | -2.367474 | 5.289220  |
| O | 1.880840  | 2.802679  | 0.202543  |
| O | 0.466973  | 0.533897  | -3.025515 |
| C | -1.334841 | -0.323607 | 1.536639  |
| C | -1.494716 | -1.591268 | 2.159297  |
| C | -1.133927 | -1.852648 | 3.491206  |
| C | -0.606814 | -0.841958 | 4.291712  |
| C | -0.467200 | 0.431453  | 3.747572  |
| C | -0.812147 | 0.671988  | 2.412143  |
| H | 6.757420  | 1.997900  | 0.549787  |
| H | 4.428226  | 3.788749  | -2.575683 |
| H | 2.437572  | 0.150382  | 4.688213  |

|   |           |           |           |
|---|-----------|-----------|-----------|
| H | 3.739634  | -3.582886 | 3.039925  |
| H | 1.062379  | -4.828603 | -0.915472 |
| H | 3.652160  | -3.246110 | -3.958956 |
| H | 0.698175  | -1.823356 | 0.867258  |
| H | 0.277418  | -3.446481 | 0.681606  |
| H | 1.899686  | -6.154877 | -2.746711 |
| H | 2.945347  | -5.542519 | -3.922390 |
| H | 4.020937  | -1.086548 | -4.074224 |
| H | 3.240418  | 0.140840  | -3.206605 |
| H | 4.239984  | -3.691969 | 0.910932  |
| H | 3.669276  | -2.697287 | -0.315174 |
| H | 3.051490  | -3.376279 | 5.358392  |
| H | 2.488382  | -1.923074 | 6.021011  |
| H | 2.271671  | 1.921238  | 1.585062  |
| H | 2.187173  | 1.914349  | 3.311222  |
| H | 1.803231  | 1.386096  | -2.647292 |
| H | 2.574807  | 2.769132  | -3.284495 |
| H | 7.121648  | 4.292717  | -0.190509 |
| H | 6.223075  | 4.982489  | -1.445493 |
| H | 5.080920  | -1.045047 | 0.648817  |
| H | 6.276838  | 0.000150  | 1.243488  |
| C | -2.096763 | -2.751500 | 1.567772  |
| C | -0.692798 | 2.059574  | 2.069431  |
| H | -1.291032 | -2.845203 | 3.897629  |
| H | -0.096743 | 1.247497  | 4.356643  |
| C | -0.181836 | -1.102620 | 5.628625  |
| C | -3.708124 | 0.619322  | 2.386587  |
| C | -2.492418 | 2.683353  | -2.044809 |
| H | -4.677800 | 2.886390  | 2.751118  |
| H | -3.698585 | 4.564095  | -1.065826 |
| C | -4.854950 | 5.142373  | 1.279366  |
| C | -5.051569 | 0.047212  | -0.236551 |
| C | -1.172145 | -2.354838 | -2.161279 |
| H | -6.089808 | -2.176130 | -0.419685 |
| H | -2.757999 | -4.221877 | -2.151190 |
| C | -5.291896 | -4.591908 | -1.329400 |
| H | -1.192480 | -0.672328 | -4.547857 |
| H | -1.587418 | 1.071897  | -4.599290 |
| H | -3.498072 | -0.280768 | -5.538608 |
| H | -3.603957 | -1.191616 | -4.018090 |
| H | -3.984470 | 0.547420  | -4.045276 |
| H | 0.338950  | 4.625364  | 0.050632  |
| H | -0.952489 | 4.656806  | -1.180495 |
| H | 0.988765  | 5.992199  | -1.989490 |
| H | 2.064999  | 4.598101  | -1.759174 |
| H | 0.770770  | 4.551287  | -3.002311 |
| N | -2.525152 | -3.800968 | 1.305675  |
| N | 0.220545  | -1.312488 | 6.699107  |
| N | -0.603327 | 3.214531  | 1.965629  |
| N | -5.375663 | 6.139775  | 1.570394  |
| N | -4.033700 | -0.160839 | 3.186256  |
| N | -2.265695 | 2.990496  | -3.143341 |
| N | -5.932083 | -5.552545 | -1.464221 |
| N | -5.879794 | 0.863853  | -0.192913 |
| N | -0.371599 | -2.565982 | -2.979549 |
